# Supplementary material for: Granulocyte and monocyte apheresis as an adjunctive therapy to induce and maintain clinical remission in ulcerative colitis: a systematic review and meta-analysis
Source: PubMed Central journal article supplement — BMJ Open. 2021 May 19;11(5):e042374. doi: 10.1136/bmjopen-2020-042374 (PMC8137160; doi:10.1136/bmjopen-2020-042374), 2021-05-19
Supplement: bmjopen-2020-042374.draft_revisions.pdf [file bmjopen-2020-042374.draft_revisions.pdf]

# BMJ Open

BMJ Open is committed to open peer review. As part of this commitment we make the peer review history of every article we publish publicly available.

When an article is published we post the peer reviewers' comments and the authors' responses online. We also post the versions of the paper that were used during peer review. These are the versions that the peer review comments apply to.

The versions of the paper that follow are the versions that were submitted during the peer review process. They are not the versions of record or the final published versions. They should not be cited or distributed as the published version of this manuscript.

BMJ Open is an open access journal and the full, final, typeset and author-corrected version of record of the manuscript is available on our site with no access controls, subscription charges or pay-per-view fees (<http://bmjopen.bmj.com>).

If you have any questions on BMJ Open's open peer review process please email [info.bmjopen@bmj.com](mailto:info.bmjopen@bmj.com)

# BMJ Open

## Granulocyte and monocyte apheresis is an excellent choice as an adjunctive therapy to induce and maintain remission in ulcerative colitis: A meta-analysis of randomized controlled trials

|                               |                                                                                                                                                                                                                                                                                                                                                                                                                                                                                                                                                                                                                                                                                                                                                                                                                                                                                                                                                                                                                                                                                                                                                                                                                                                                                                                                                                                                                                                                                                                                                                                                               |
|-------------------------------|---------------------------------------------------------------------------------------------------------------------------------------------------------------------------------------------------------------------------------------------------------------------------------------------------------------------------------------------------------------------------------------------------------------------------------------------------------------------------------------------------------------------------------------------------------------------------------------------------------------------------------------------------------------------------------------------------------------------------------------------------------------------------------------------------------------------------------------------------------------------------------------------------------------------------------------------------------------------------------------------------------------------------------------------------------------------------------------------------------------------------------------------------------------------------------------------------------------------------------------------------------------------------------------------------------------------------------------------------------------------------------------------------------------------------------------------------------------------------------------------------------------------------------------------------------------------------------------------------------------|
| Journal:                      | <i>BMJ Open</i>                                                                                                                                                                                                                                                                                                                                                                                                                                                                                                                                                                                                                                                                                                                                                                                                                                                                                                                                                                                                                                                                                                                                                                                                                                                                                                                                                                                                                                                                                                                                                                                               |
| Manuscript ID                 | bmjopen-2020-042374                                                                                                                                                                                                                                                                                                                                                                                                                                                                                                                                                                                                                                                                                                                                                                                                                                                                                                                                                                                                                                                                                                                                                                                                                                                                                                                                                                                                                                                                                                                                                                                           |
| Article Type:                 | Original research                                                                                                                                                                                                                                                                                                                                                                                                                                                                                                                                                                                                                                                                                                                                                                                                                                                                                                                                                                                                                                                                                                                                                                                                                                                                                                                                                                                                                                                                                                                                                                                             |
| Date Submitted by the Author: | 02-Jul-2020                                                                                                                                                                                                                                                                                                                                                                                                                                                                                                                                                                                                                                                                                                                                                                                                                                                                                                                                                                                                                                                                                                                                                                                                                                                                                                                                                                                                                                                                                                                                                                                                   |
| Complete List of Authors:     | <p>Kiss, Szabolcs; University of Szeged, Doctoral School of Clinical Medicine; University of Pecs Medical School, Institute for Translational Medicine</p> <p>Németh, Dávid; University of Pecs Medical School, Institute for Translational Medicine</p> <p>hegyi, Péter; University of Pecs Medical School, Institute for Translational Medicine; University of Pecs, János Szentágothai Research Centre</p> <p>Földi, Mária ; Szegedi Tudományegyetem, Doctoral School of Clinical Medicine, University of Szeged; University of Pecs Medical School, Institute for Translational Medicine</p> <p>Szakács, Zsolt; University of Pecs Medical School, Institute for Translational Medicine; University of Pecs, János Szentágothai Research Centre</p> <p>Erőss, Bálint; University of Pecs Medical School, Institute for Translational Medicine; University of Pecs, János Szentágothai Research Centre</p> <p>Tinusz, Benedek; University of Pecs Medical School, First Department of Medicine</p> <p>Hegy, Péter Jenő; University of Pecs Medical School, Institute for Translational Medicine; University of Pecs Medical School, Division of Gastroenterology, First Department of Medicine</p> <p>Sarlós, Patrícia; University of Pecs Medical School, Institute for Translational Medicine; University of Pecs Medical School, Division of Gastroenterology, First Department of Medicine</p> <p>Hussain, Alizadeh; Szegedi Tudományegyetem, Doctoral School of Clinical Medicine, University of Szeged; University of Pecs Medical School, Division of Haematology, First Department of Medicine</p> |
| Keywords:                     | Inflammatory bowel disease < GASTROENTEROLOGY, IMMUNOLOGY, Gastroenterology < INTERNAL MEDICINE, HAEMATOLOGY                                                                                                                                                                                                                                                                                                                                                                                                                                                                                                                                                                                                                                                                                                                                                                                                                                                                                                                                                                                                                                                                                                                                                                                                                                                                                                                                                                                                                                                                                                  |
|                               |                                                                                                                                                                                                                                                                                                                                                                                                                                                                                                                                                                                                                                                                                                                                                                                                                                                                                                                                                                                                                                                                                                                                                                                                                                                                                                                                                                                                                                                                                                                                                                                                               |

SCHOLARONE™  
Manuscripts

1  
2  
3  
4  
5  
6  
7  
8  
9  
10  
11  
12  
13  
14  
15  
16  
17  
18  
19  
20  
21  
22  
23  
24  
25  
26  
27  
28  
29  
30  
31  
32  
33  
34  
35  
36  
37  
38  
39  
40  
41  
42  
43  
44  
45  
46  
47  
48  
49  
50  
51  
52  
53  
54  
55  
56  
57  
58  
59  
60

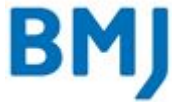

I, the Submitting Author has the right to grant and does grant on behalf of all authors of the Work (as defined in the below author licence), an exclusive licence and/or a non-exclusive licence for contributions from authors who are: i) UK Crown employees; ii) where BMJ has agreed a CC-BY licence shall apply, and/or iii) in accordance with the terms applicable for US Federal Government officers or employees acting as part of their official duties; on a worldwide, perpetual, irrevocable, royalty-free basis to BMJ Publishing Group Ltd ("BMJ") its licensees and where the relevant Journal is co-owned by BMJ to the co-owners of the Journal, to publish the Work in this journal and any other BMJ products and to exploit all rights, as set out in our [licence](#).

The Submitting Author accepts and understands that any supply made under these terms is made by BMJ to the Submitting Author unless you are acting as an employee on behalf of your employer or a postgraduate student of an affiliated institution which is paying any applicable article publishing charge ("APC") for Open Access articles. Where the Submitting Author wishes to make the Work available on an Open Access basis (and intends to pay the relevant APC), the terms of reuse of such Open Access shall be governed by a Creative Commons licence – details of these licences and which [Creative Commons](#) licence will apply to this Work are set out in our licence referred to above.

Other than as permitted in any relevant BMJ Author's Self Archiving Policies, I confirm this Work has not been accepted for publication elsewhere, is not being considered for publication elsewhere and does not duplicate material already published. I confirm all authors consent to publication of this Work and authorise the granting of this licence.

# Granulocyte and monocyte apheresis is an excellent choice as an adjunctive therapy to induce and maintain remission in ulcerative colitis: A meta-analysis of randomized controlled trials

1 Szabolcs Kiss<sup>1,2</sup>, Dávid Németh<sup>2</sup>, Péter Hegyi<sup>2,3</sup>, Mária Földi<sup>1,2</sup>, Zsolt Szakács<sup>2,3</sup>, Bálint Erőss<sup>2,3</sup>,  
2 Benedek Tinusz<sup>4</sup>, Péter Jenő Hegyi<sup>2,5</sup>, Patrícia Sarlós<sup>2,5</sup>, Hussain Alizadeh<sup>1,6\*</sup>

3 <sup>1</sup>Doctoral School of Clinical Medicine, University of Szeged, Szeged, Hungary

4 <sup>2</sup>Institute for Translational Medicine, Medical School, University of Pécs, Pécs, Hungary

5 <sup>3</sup>János Szentágotthai Research Centre, University of Pécs, Pécs, Hungary

6 <sup>4</sup>First Department of Medicine, Medical School, University of Pécs, Pécs, Hungary

7 <sup>5</sup>Division of Gastroenterology, First Department of Medicine, Medical School, University of Pécs,  
8 Pécs, Hungary

9 <sup>6</sup>Division of Haematology, First Department of Medicine, Medical School, University of Pécs, Pécs,  
10 Hungary

## 11 \* Correspondence:

12 Alizadeh Hussain M.D., Ph.D., Address: First Department of Medicine, University of Pécs Medical  
13 School, H-7624 Pécs, Ifjúság útja 13., Hungary; Tel: +(36-30) 643-6099

14 E-mail: alizadeh.hussain@pte.hu

15 **Keywords:** Inflammatory bowel disease; IMMUNOLOGY; Gastroenterology;  
16 HAEMATOLOGY

## 1 Abstract

**Objective:** The goal of treatment in ulcerative colitis (UC) is to induce and maintain remission. The addition of granulocyte and monocyte apheresis (GMA) to conventional therapy may be a promising therapeutic alternative. In this meta-analysis, we aimed to assess the efficacy and safety profile of GMA as an adjunctive therapy.

**Design:** Systematic review and meta-analysis.

**Methods:** We searched four databases (MEDLINE, Embase, Web of Science, and Cochrane Central Register of Controlled Trials) for randomized or minimized controlled trials which discussed the impact of additional GMA therapy on clinical remission induction and clinical remission maintenance compared to conventional therapy alone. Primary outcome were clinical remission induction and maintenance, secondary outcomes were adverse events (1) and steroid-sparing effect. Odds ratios (OR) with 95% confidence intervals were calculated. Trial Sequential Analyses (TSA) were performed to adjust for the risk of random errors in meta-analyses.

**Results:** A total of eleven studies were eligible for meta-analysis. GMA was clearly demonstrated to induce and maintain clinical remission more effectively than conventional therapy alone (598 patients: OR: 1.93, CI: 1.28–2.91,  $p=0.002$  for induction; 71 patients: OR: 8.34, CI: 2.64–26.32,  $p<0.001$  for maintenance).

**Conclusion:** GMA appears to be more effective as an adjunctive treatment in inducing and maintaining remission in UC patients than conventional therapy alone.

**Protocol registration number:** PROSPERO CRD42019134050.

Word count: 3801

## 2 Article Summary

### Strengths and limitations of this study

- This meta-analysis showed for the first time that GMA remarkably improves clinical remission maintenance compared with standard therapy alone in patients with UC.
- Grading of Recommendations Assessment, Development and Evaluation approach was applied to appraise the certainty of evidence.
- Our results are limited by the relatively low number of patients.
- To address the limitation by the number of included patients and to control both type I and type II errors, Trial Sequential Analyses have been performed.

### 3 Introduction

Ulcerative colitis (UC) is one of two major types of inflammatory bowel disease (IBD). The incidence of this disease varies from nine to 20 cases per 100 000 person-years (2). UC is a lifelong illness that has a profound impact on patients. The primary goal of treatment is to achieve and maintain remission, thereby preventing colectomy and colorectal neoplasms and ensuring an acceptable quality of life (3). The choice of treatment for patients with UC is tied to the clinical and endoscopic severity of the disease along with the frequency and severity of relapses. Patients with no response to conventional therapies, especially to corticosteroids and immunosuppressive agents, are common candidates for biological treatments and/or surgery. However, both of these options are challenged by the high costs and incidence of side-effects and complications.

Patients with UC usually have a raised level of granulocytes, and, in the case of an active disease, the mucosa of the bowel is infiltrated by a large number of granulocytes and macrophages. These leukocytes release degradative enzymes and proinflammatory cytokines, which lead to further inflammation of the bowel. Based on the hypothesis that a reduction of activated granulocytes and monocytes/macrophages may be beneficial, granulocyte-monocyte apheresis (GMA) was proposed as a strategy to promote remission in active UC (4). GMA is a novel non-pharmacological treatment tool for patients with UC, comprising an extra-corporeal absorptive circuit, which decreases inflammatory cytokines and upregulates regulatory T cells. Despite its high cost, GMA seems to have a good safety profile (4).

However, data on the efficacy of GMA are still debated. The first studies published in Japan showed remission or response rates of up to 60–80% (1, 5, 6). Sands et al. reported a study with a large number of patients comparing GMA to a placebo, and they found no significant difference in terms of clinical response (7). This substantial difference between studies could be explained by the heterogeneity of patients' characteristics, most probably by the varying severity and extent of the disease.

A large proportion of patients require long-term, high-dose steroid treatment, which often results in severe side-effects impairing patients' quality of life. If addition of GMA can reduce the dose of corticosteroids, the risk of steroid-induced adverse events (AEs) could be minimized. Therefore, it is also essential to evaluate the steroid-sparing effects of GMA (8). Beyond the induction of remission and the impact on steroid requirement, the role of GMA in maintaining remission is unclear (9). The aim of our study was to assess the role of GMA in the induction and maintenance of clinical remission in UC and to evaluate the potential steroid-sparing effect of the therapy.

### 4 Methods

The meta-analysis was reported in accordance with the Preferred Reporting Items for Systematic Reviews and Meta-Analyses Statement (10). The review protocol was registered on the PROSPERO International Prospective Register of Systematic Reviews (CRD42019134050).

#### 4.1 Search strategy

The systematic literature search was conducted by two independent reviewers (KS and FM) in MEDLINE (via PubMed), EMBASE, the Cochrane Library (CENTRAL), and the Web of Science for studies published up to 5<sup>th</sup> March 2019. The search query in each database was based on PICO components combined with Boolean operators: (gma OR apheresis OR adsorption OR "cell separation" OR leukapher\* OR leukopher\* OR leukocytapher\* OR leukocytopher\* OR lymphapher\*

90 OR lymphopher\* OR lymphocytopher\* OR lymphocytapher\*) AND (“inflammatory bowel disease”  
91 OR “ulcerative colitis”) AND (random\*).

## 4.2 Eligibility criteria

93 General criteria: a randomized controlled trial (RCT) or minimized controlled trial (This type of  
94 sequence generation is considered to be nearly equivalent to being random) (11); only full-text articles  
95 were included.

96 Specific criteria for clinical remission induction: patients with active UC (*Population*<sub>1</sub>),  
97 standard therapy for remission induction and GMA as an adjunctive therapy (*Intervention*<sub>1</sub>), and  
98 standard therapy for remission induction (*Comparison*<sub>1</sub>); *Outcomes*<sub>1</sub>: clinical response rate and clinical  
99 remission rate (defined either by the clinical activity index (CAI) or full Mayo score) and AEs.[12, 13]

100 Specific criteria for clinical remission maintenance: patients with UC in clinical remission  
101 induced by GMA (*Population*<sub>2</sub>), standard therapy for remission maintenance and GMA as an  
102 adjunctive therapy (*Intervention*<sub>2</sub>), and standard therapy for remission maintenance (*Comparison*<sub>2</sub>);  
103 *Outcomes*<sub>2</sub>: rate of maintained remission (defined either by the CAI or full Mayo score) and AEs.

104 The titles of the studies were screened based on predefined criteria, and the relevant studies  
105 were selected for abstract review. If the abstract was found to be appropriate, the full text of the article  
106 was studied. The decision to include a study in the meta-analysis was based on an independent  
107 assessment by the two reviewers and eventually by consensus for resolution of any disagreements.  
108 Reference lists in included studies and reviews on this topic were searched for additional studies.  
109 Publications citing the included studies were also screened in the Google Scholar academic search  
110 engine.

## 4.3 Data extraction

112 The two investigators (KS and FM) reviewed the articles independently and extracted data into a  
113 standardized data collection form (discrepancies were resolved based on consensus). For the selected  
114 studies, characteristics were extracted, including publication year, country, number of centres, number  
115 of patients, and study design. In addition, patient characteristics (age, sex, and extent of disease), details  
116 of therapy (concomitant medication, volume of GMA, number of GMA cycles, and duration of  
117 treatment), and main outcomes (number of patients with clinical improvement/response, number of  
118 patients achieving clinical remission, number of patients with maintained remission, and number of  
119 AEs) were also extracted.

## 4.4 Risk of bias assessment

121 The Cochrane Risk of Bias Tool was used by the two independent investigators (KS and FM) to assess  
122 the quality of the studies included. Any disagreement was resolved based on consensus (12). Major  
123 domains of quality assessment were the following:

- 124 1. Random sequence generation (selection bias)
- 125 2. Allocation concealment (selection bias)
- 126 3. Blinding of participants and personnel (performance bias)
- 127 4. Blinding of outcome assessment (detection bias)
- 128 5. Incomplete outcome data (attrition bias)
- 129 6. Selective reporting (reporting bias)



- 1  
2 130 7. Other bias (early stopping, baseline imbalance, blocked randomization with unblinded trials,  
3 131 and imputation of intention-to-treat (ITT) analysis)  
4

#### 5 132 4.5 Statistical analysis 6

7 133 The effect measure of dichotomous variables was reported for each outcome as the odds ratio (OR)  
8 134 with the related 95% confidence interval (8). All tests were 2-sided, and a p value <0.05 was considered  
9 135 statistically significant (except for heterogeneity, for which a p value <0.10 was considered  
10 136 significant). Weighted mean difference (WMD) was calculated for continuous variables. Values of OR,  
11 137 WMD, and weights are presented in forest plots. The random-effects model was used to pool effect  
12 138 sizes. Heterogeneity was tested both by performing Cochran's Q test and calculating  
13 139 Higgins' I<sup>2</sup> indicator.[(13, 14)6] The Q statistics were computed as the squared deviations from the  
14 140 pooled effect of the weighted sum of individual study effects, with the weights being used in the  
15 141 pooling method. P values were obtained by comparing test statistics with a chi-square with k-1 degrees  
16 142 of freedom (where k was the number of studies). The I<sup>2</sup> index corresponds to the percentage of the total  
17 143 variability across studies due to heterogeneity. A rough classification of its value based on the Cochrane  
18 144 Handbook for Systematic Reviews of Interventions is the following: low (0–40%), moderate (30–  
19 145 60%), substantial (50–90%), and considerable (75–100%).[(11)] Subgroup analysis was performed as  
20 146 described in the study protocol if a sufficient number of studies was available. Funnel plots were used  
21 147 to test the presence of publication bias. A Trial Sequential Analysis (TSA 0.9.5.10.) was also performed  
22 148 for the randomized controlled studies to quantify the statistical reliability and to estimate the optimal  
23 149 information size (OIS). This methodology combines an information size with the threshold of statistical  
24 150 significance. All the statistical analyses were performed using Comprehensive Meta-Analysis (version  
25 151 3, Biostat Inc., Englewood, NJ, USA) and StataIC (version 15.1).  
26  
27  
28  
29

#### 30 152 4.6 Quality of evidence 31

32 153 The GRADE approach was used by the two independent reviewers (KS and FM) to assess the quality  
33 154 of evidence for each outcome (15, 16). Disagreements were resolved by consensus.  
34

### 35 155 5 Results 36

#### 37 156 5.1 Search and selection 38

39 157 The search process is shown in **Figure 1**. A total of 334 records were identified in the databases. After  
40 158 screening and assessment for eligibility, eleven full-text articles containing one minimized controlled  
41 159 trial and eleven RCTs were included for analysis. Eight studies provided data on patients with active  
42 160 UC, and three studies contained data on patients with UC in clinical remission.  
43  
44

#### 45 161 5.2 Characteristics of the studies included 46

47 162 The characteristics of the included studies are presented in **Table 1**. In the case of clinical remission  
48 163 induction, all the studies were RCTs, except for the one study with minimization (17). A total of 598  
49 164 participants (mean: 77, ranging from 19 to 168) were included in this meta-analysis: 350 patients  
50 165 received GMA, and 248 were in control groups. All the participants had active UC and were treated  
51 166 with Adacolumn® (7, 17-23). Four of these trials were sham-controlled. All the patients received  
52 167 standard of care added to the intervention/comparator.  
53

54 168 Both GMA and control were added to conventional treatment. In terms of main outcomes, the studies  
55 169 investigated the rate of clinical remission and clinical response. Investigators assessed the activity of  
56  
57  
58  
59

1  
2 170 UC with either the Mayo score or CAI. One study required steroid-free remission to regard cases as  
3 171 being in clinical remission.

4  
5 172 In the case of clinical remission maintenance, all the studies were randomized controlled trials. A total  
6 173 of 71 participants (mean: 24, ranging from 13 to 37) were included in this meta-analysis: 36 patients  
7 174 received GMA, and 35 were in control groups. All the participants had ulcerative colitis in remission  
8 175 and were treated with Adacolumn® or Cellisorba®. One trial evaluated GMA vs sham control (24) and  
9 176 two trials assessed GMA compared to standard therapy alone (9, 25). Both GMA and sham control  
10 177 were added to conventional treatment. In terms of main outcome, the studies investigated the rate of  
11 178 clinical relapse.

12  
13 179 Three studies also reported on the steroid-sparing effect of GMA (9, 17, 22).

### 14 15 180 **5.3 Risk of bias assessment**

16  
17 181 A summary of risk of bias assessment is shown in **Supplementary Figure 1 and Supplementary**  
18 182 **Figure 2**. One study was graded at a high risk of selection bias because it used minimization for  
19 183 sequence generation (17). Three unblinded studies were at high risk of performance bias (19, 22, 25).  
20 184 Because of the nature of the intervention, four studies which lacked a description of the blinding  
21 185 process were interpreted as having a high risk of bias (18, 21, 23, 24). As regards assessment blinding,  
22 186 two unblinded studies were judged to be at high risk of bias (19, 25). Two studies were deemed as  
23 187 having a high risk of other bias; although they used ITT analysis, they considered subjects who left the  
24 188 study as a treatment failure that may lead to bias (7).

### 25 26 27 189 **5.4 Efficacy and safety of GMA in clinical remission induction**

28  
29 190 Seven randomized and one minimized controlled trial evaluated clinical remission induction. GMA  
30 191 therapy was associated with a better clinical response rate compared to the control group (OR = 2.03,  
31 192 95% CI = 1.36–3.01,  $p < 0.001$ ,  $I^2 = 8.4\%$ ) (**Supplementary Figure 3**). Patients undergoing GMA  
32 193 therapy had a higher remission rate compared to standard therapy without GMA (OR = 1.93, 95% CI  
33 194 = 1.28–2.91,  $p = 0.002$ ,  $I^2 = 0.0\%$ ) (**Figure 2**). Sub-group analyses were performed based on activity  
34 195 indices and number of GMA cycles. No difference was found between the two groups in studies  
35 196 assessing UC with the Mayo score (OR = 1.34, 95% CI = 0.74–2.43,  $p = 0.334$ ,  $I^2 = 0.0\%$ ), but the  
36 197 remission induction was more successful in studies using CAI for assessment (OR = 2.70, 95% CI =  
37 198 1.52–4.79,  $p = 0.001$ ,  $I^2 = 0.0\%$ ) (**Supplementary Figure 4**). A significant difference was found in  
38 199 studies using five cycles compared to the control (OR = 2.78, 95% CI = 1.17–6.60,  $p = 0.021$ ,  $I^2 = 0.0\%$ )  
39 200 and more than five cycles compared to standard therapy alone (OR = 1.73, 95% CI = 1.08–2.77,  
40 201  $p = 0.022$ ,  $I^2 = 0.0\%$ ). There was no statistically significant difference in the number of AEs ( $p = 0.135$ )  
41 202 (**Supplementary Figure 5**). No statistically significant steroid-sparing effect was detected among  
42 203 patients with active UC ( $p = 0.080$ ). A list of reported AEs is presented in **Supplementary Table 1**.

### 43 44 45 46 204 **5.5 Efficacy and safety of GMA in clinical remission maintenance**

47  
48 205 Three randomized clinical trials evaluated the clinical remission rate in remitting UC induced by GMA.  
49 206 Patients receiving GMA had a higher rate of clinical remission maintenance (OR = 8.34, 95% CI =  
50 207 2.64–26.32,  $p < 0.001$ ,  $I^2 = 0.0\%$ ) (**Figure 3**). Due to lack of data, the rate of AEs could not be assessed  
51 208 in this population.

1  
2 2093  
4 210 **5.6 Trial Sequential Analysis**

5  
6 211 Based on a TSA, the cumulative Z curve crossed the trial sequential significance boundary as regards  
7 212 clinical remission induction and clinical remission maintenance (power=80.0%; alpha=5.0%)  
8 213 (**Supplementary Figure 6**). Moreover, clinical remission maintenance exceeded the required meta-  
9 214 analysis sample size, possibly suggesting that further clinical trials are not required. A TSA for AEs  
10 215 and steroid-sparing effects could not be carried out due to insufficient information size.

11  
12  
13 216 **5.7 Quality of evidence**

14  
15 217 The GRADE analysis rated the quality of evidence for primary and secondary outcomes at a very low  
16 218 to moderate level. GRADE evidence profile is shown in **Supplementary Table 2**.

17  
18 219 **6 Discussion**

19  
20 220 The main goal of care is to achieve and maintain remission of UC. This condition is usually treated by  
21 221 a step-up approach, during which treatments are switched or additional treatment is administered to  
22 222 optimize current therapy. There are several therapeutic agents to slow down the clinical activity of UC.  
23 223 Corticosteroids, 5-aminosalicylates, immunosuppressive agents, and tumour necrosis alpha-inhibitors  
24 224 are commonly used, and new therapeutic targets, such as anti-adhesion molecules and anti-interleukins,  
25 225 are emerging. Despite these multiple therapeutic options, there is still a need to expand the scope of  
26 226 treatment methods due to possible development of intolerance or resistance to current treatments. After  
27 227 running out of treatment options, surgical therapy is frequently the last remaining option for patients.  
28 228 GMA is a novel non-pharmacologic treatment option for active and remitting UC, by which activated  
29 229 granulocytes and monocytes are removed from the circulation. These cells may contribute to the  
30 230 pathogenesis of UC.

31  
32 231 Guidelines describing the role of GMA in UC are in agreement on the potential beneficial effect and  
33 232 favourable safety profile. They also agree that there is insufficient evidence in this field of practice (26,  
34 233 27).

35  
36 234 To our knowledge, the first report on the efficacy of GMA in UC was published in Japan in 2001 (28).  
37 235 This study found a considerably high remission rate with only five sessions of GMA in patients  
38 236 refractory to conventional drug therapy. Subsequent studies from the early 21<sup>st</sup> century had similar  
39 237 results (29-31). In 2008, Sands et al. failed to prove a significant difference in clinical remission rate  
40 238 between GMA and a placebo on a relatively large population (7). However, this study was not free of  
41 239 attrition bias; a high proportion of patients were lost to follow-up. Three systematic reviews and meta-  
42 240 analyses have been conducted in this field so far (32-34). All of them have agreed on the benefit of  
43 241 GMA in clinical remission induction, and they pointed out the necessity for more trials with a rigorous  
44 242 and clear design to further narrow the focus on specific patient groups. These studies used one to three  
45 243 databases for a systematic search and selection.

46  
47 244 In our current meta-analysis, a broader literature search was carried out, and the role of GMA in clinical  
48 245 remission maintenance was assessed. Our work supported the hypothesis that GMA improves the rates  
49 246 of clinical response and clinical remission in patients with UC. It should be noted that response and  
50 247 remission rates defined by symptom scores should be cautiously interpreted because they also include  
51 248 subjective elements, such as overall physician judgement on disease activity. A few recent  
52 249 retrospective and prospective studies have suggested certain prognostic factors in the therapeutic  
53 250 response (35-37). It seems that younger patients respond better to GMA therapy, whereas gender and  
54  
55  
56  
57  
58  
59  
60

1  
2 251 smoking status showed no difference in response to treatment (35). Yokoyama et al. found that shorter  
3 252 duration of UC and lower cumulative corticosteroid dose are associated with a higher efficacy rate  
4 253 (36). In their study, patients who received GMA treatment immediately after relapse were the best  
5 254 responders. It would be advisable to conduct further research to identify subgroups of UC where  
6 255 patients benefit the most from GMA (38).

8 256 To date, there is no uniformly accepted GMA regimen. There are RCTs to compare a ten-cycle and a  
9 257 five-cycle GMA regimen. Dignass et al. and Ricart et al. found similar remission rates between ten and  
10 258 five cycles (46% vs. 36%,  $p=0.479$ ; 35.7% vs 45.5%,  $p>0.05$ , respectively) (38, 39). The latter study  
11 259 also showed a steroid-sparing effect in the group receiving ten cycles of GMA. Sakuraba et al. found  
12 260 that an improved remission rate is associated with intensive GMA (54.0% vs 71.2%,  $p=0.029$  in five-  
13 261 and ten-cycle regimens, respectively) (40). In our meta-analysis, the number of GMA cycles varied  
14 262 among studies as well. We assessed the efficacy of GMA based on the two main regimens in previous  
15 263 trials. Both groups showed a benefit of adding GMA to the therapy compared to standard treatment  
16 264 alone.

19 265 We found no significant difference between the two groups as regards AEs. Further studies are called  
20 266 for to provide a higher level of evidence on this topic. They would be particularly important for specific  
21 267 subgroups where the safety profile is of paramount importance, such as in cytomegalovirus infection,  
22 268 adolescence, and pregnancy. Clinical trials should also target these populations because fewer  
23 269 therapeutic options are available for them and the safety profile of GMA seems favourable compared  
24 270 to other treatments.

26 271 As with any therapeutic option, cost-effectiveness should also be considered. The cost of GMA is much  
27 272 higher compared to regular medication, such as corticosteroids, but GMA could be cost-effective in  
28 273 the long term. The use of GMA may reduce the cost of medical services, hospitalization, and surgery  
29 274 in the long term. Nevertheless, GMA's safety profile is in sharp contrast to multiple severe AEs  
30 275 associated with conventional pharmacologics and biologics.

32 276 To our knowledge, this is the first meta-analysis to assess the role of GMA in UC remission  
33 277 maintenance. Our study showed that the addition of GMA enhances the proportion of patients who can  
34 278 maintain their remission. Fukunaga et al. and Emmrich et al. enrolled clinically active UC patients  
35 279 based on CAI (9, 24). After successful induction therapy with the inclusion of GMA, patients achieving  
36 280 clinical remission were allocated to groups with and without GMA treatment for remission  
37 281 maintenance. Maiden et al. enrolled UC patients with a high level of faecal calprotectin, which is  
38 282 considered as a risk factor of relapse (25). This study differs from the previous two in the fact that they  
39 283 enrolled an asymptomatic population regardless of how patients achieved remission. The two studies  
40 284 recruiting patients with active UC detected no statistically significant difference between study arms  
41 285 in time to first relapse; however, it must be noted that in one of these studies, all the patients became  
42 286 steroid-free in the GMA group (9). Maiden et al. found that time to first relapse was significantly higher  
43 287 in patients receiving GMA ( $99\pm 73$  days vs.  $161\pm 44$  days,  $p=0.0004$ ). Despite our very promising  
44 288 results, these findings are limited by the amount of available data. More randomized controlled trials  
45 289 are necessary in this area to strengthen our results. This study has some potential limitations. Allowed  
46 290 concomitant therapies have differed among included studies; therefore, our estimates may have been  
47 291 subject to bias, as reflected by the grade of evidence (**Supplementary Table 2**). Moreover, our funnel  
48 292 plots showed symmetry by visual assessment, but publication bias still cannot be ruled out because of  
49 293 the low number of included studies. Side-effects and safety data were not uniformly reported in most  
50 294 of the publications under analysis, according to the International Conference on Harmonisation-Good  
51 295 Clinical Practice (ICH-GCP) guidelines (41). Furthermore, this result is strongly limited by the high  
52 296 heterogeneity of studies. All in all, GMA seems to be a reasonable therapeutic option, but finding its

2 297 exact place to treat UC demands further research. A particularly promising area could be remission  
3 298 maintenance.

## 5 299 **6.1 Conclusion**

7 300 Implications for practice: The results support the hypothesis that patients with active UC have a  
8 301 better chance of remission if GMA is administered as an adjunctive therapy. As regards the  
9 302 frequency of AEs, we found no statistically significant difference between the two groups. With  
10 303 regard to remission maintenance, GMA was identified as an effective alternative therapeutic option.

13 304 Implications for research: Further studies are required to select patients who may benefit the most  
14 305 from GMA therapy. Nevertheless, more randomized controlled studies are necessary to justify its  
15 306 role in remission induction. If GMA is proven to be safe and effective, cost-effectiveness studies will  
16 307 also be worthwhile in the future.

## 18 308 **7 Data availability statement**

20 309 The data that support the findings of this study are available from the corresponding author, [A.H.],  
22 310 upon reasonable request.

## 24 311 **8 Patient and Public Involvement**

26 312 It was not appropriate or possible to involve patients or the public in the design, or conduct, or  
27 313 reporting, or dissemination plans of our research.

## 29 314 **9 Author contributions**

31 315 S.K.: preparation of the draft of the manuscript, selection of studies, data extraction, risk of bias  
32 316 assessment; G.N.: statistical analysis, preparation of the standardized data collection sheet; P.H.:  
33 317 substantial contribution in study design; M.F.: selection of studies, data extraction; F.D.: selection of  
34 318 studies, data extraction; B.N. data extraction, risk of bias assessment; M.F.J.: preparation of the  
35 319 standardized data collection sheet, stylistic and grammatical revision of the manuscript; K.O.: risk of  
36 320 bias assessment, stylistic and grammatical revision of the manuscript; Z.M.: expert in the field of  
37 321 anaesthesiology and intensive therapy, substantial contribution in study design and interpretation of  
38 322 data, preparation of the manuscript; N.Z.: substantial contribution in study design; A.P.: preparation  
39 323 of the study protocol; P.J.H.: preparation of the standardized data collection sheet, stylistic and  
40 324 grammatical revision of the manuscript; Z.S.: participation in the design of the study and its  
41 325 coordination; P.G.: provided revisions to the scientific content of the manuscript; B.E.: provided  
42 326 revisions to the scientific content of the manuscript; A.H.: expert in the field of haematology,  
43 327 substantial contribution in study design and interpretation of data, preparation of study protocol and  
44 328 the first draft of the manuscript.

## 48 329 **10 Funding**

51 330 This research was not a company-initiated study. All costs were covered by the Economic  
52 331 Development and Innovation Operative Programme Grant (GINOP 2.3.2-15-2016-00048), the Grant  
53 332 of the Hungarian Science Foundation (FK 132834), and by Human Resources Development  
54 333 Operational Programme Grants (EFOP-3.6.2-16-2017-00006). Sponsors were not involved in the  
55 334 design, data collection, analysis, interpretation, or preparation of the manuscript.

## 11 Conflict of interest

Authors do not have any conflicts of interest to declare.

## 12 Compliance with Ethical Standards

This study was prepared in accordance with the Committee on Publication Ethics (COPE) guidelines to respect third parties rights such as copyright and/or moral rights. Ethical approval was not required to conduct this project as data is not individualized and primary data was not collected.

## 13 Abbreviations

AE, adverse events; clinical activity index, CAI; confidence interval, CI; granulocyte and monocyte apheresis, GMA; inflammatory bowel disease, IBD; OR, odds ratio; RCT, randomized controlled trial; TSA, trial sequential analysis; UC, ulcerative colitis; weighted mean difference, WMD.

## 14 References

1. Yamamoto T, Umegae S, Matsumoto K. Long-term clinical impact of early introduction of granulocyte and monocyte adsorptive apheresis in new onset, moderately active, extensive ulcerative colitis. *J Crohns Colitis*. 2012;6(7):750-5.
2. Ordás I, Eckmann L, Talamini M, Baumgart DC, Sandborn WJ. Ulcerative colitis. *The Lancet*. 2012;380(9853):1606-19.
3. Ungaro R, Mehandru S, Allen PB, Peyrin-Biroulet L, Colombel J-F. Ulcerative colitis. *The Lancet*. 2017;389(10080):1756-70.
4. Saniabadi AR, Tanaka T, Ohmori T, Sawada K, Yamamoto T, Hanai H. Treating inflammatory bowel disease by adsorptive leucocytapheresis: a desire to treat without drugs. *World J Gastroenterol*. 2014;20(29):9699-715.
5. Matsumoto T, Fukunaga K, Kamikozuru K, Tozawa K, Yokoyama Y, Kusaka T, et al. Cytapheresis as a Non-Pharmacological Therapy for Inflammatory Bowel Disease. *Transfus Med Hemother*. 2008;35(1):18-23.
6. Yamamoto T. The role of granulocyte and monocyte apheresis in inflammatory bowel disease. *J Crohns Colitis*. 2013;7(3):e114.
7. Sands BE, Sandborn WJ, Feagan B, Lofberg R, Hibi T, Wang T, et al. A randomized, double-blind, sham-controlled study of granulocyte/monocyte apheresis for active ulcerative colitis. *Gastroenterology*. 2008;135(2):400-9.
8. Bresci G, Parisi G, Mazzoni A, Scatena F, Capria A. Treatment of patients with acute ulcerative colitis: conventional corticosteroid therapy (MP) versus granulocytapheresis (GMA): a pilot study. *Dig Liver Dis*. 2007;39(5):430-4.
9. Fukunaga K, Yokoyama Y, Kamokozuru K, Nagase K, Nakamura S, Miwa H, et al. Adsorptive granulocyte/monocyte apheresis for the maintenance of remission in patients with ulcerative colitis: a prospective randomized, double blind, sham-controlled clinical trial. *Gut Liver*. 2012;6(4):427-33.
10. Moher D, Liberati A, Tetzlaff J, Altman DG, Group P. Preferred reporting items for systematic reviews and meta-analyses: the PRISMA statement. *PLoS Med*. 2009;6(7):e1000097.

- 1  
2 373 11. Hoboken. Cochrane Handbook for Systematic Reviews of Interventions: Wiley; 2008.
- 3  
4 374 12. Higgins JP, Altman DG, Gotzsche PC, Juni P, Moher D, Oxman AD, et al. The Cochrane  
5 375 Collaboration's tool for assessing risk of bias in randomised trials. *BMJ*. 2011;343:d5928.
- 6  
7 376 13. Cochran WG. The Combination of Estimates from Different Experiment. *Biometrics*.  
8 377 1954;10:101-29.
- 9  
10 378 14. Julian P T Higgins SGT, Jonathan J Deeks, Douglas G Altman. Measuring inconsistency in  
11 379 meta-analyses. *British Medical Journal*. 2003;327:557-60.
- 12 380 15. Schünemann H, Brożek J, Guyatt G, Oxman A, editors. GRADE handbook for grading  
13 381 quality of evidence and strength of recommendations. Updated October 2013. The GRADE Working  
14 382 Group, 2013. Available from [guidelinedevelopment.org/handbook](http://guidelinedevelopment.org/handbook).
- 15  
16 383 16. Schünemann H, Brożek J, Guyatt G, A O. GRADE handbook for grading quality of evidence  
17 384 and strength of recommendations: The GRADE Working Group, 2013; 2013.
- 18  
19 385 17. Sawada K, Kusugami K, Suzuki Y, Bamba T, Munakata A, Hibi T, et al. Leukocytapheresis  
20 386 in ulcerative colitis: results of a multicenter double-blind prospective case-control study with sham  
21 387 apheresis as placebo treatment. *Am J Gastroenterol*. 2005;100(6):1362-9.
- 22  
23 388 18. Bresci G, Parisi G, Mazzoni A, Scatena F, Capria A. Granulocytapheresis versus  
24 389 methylprednisolone in patients with acute ulcerative colitis: 12-month follow up. *J Gastroenterol*  
25 390 *Hepatol*. 2008;23(11):1678-82.
- 26  
27 391 19. Domenech E, Panes J, Hinojosa J, Annese V, Magro F, Sturniolo GC, et al. Addition of  
28 392 Granulocyte/Monocyte Apheresis to Oral Prednisone for Steroid-dependent Ulcerative Colitis: A  
29 393 Randomized Multicentre Clinical Trial. *J Crohns Colitis*. 2018;12(6):687-94.
- 30  
31 394 20. Eberhardson M, Karlen P, Linton L, Jones P, Lindberg A, Kostalla MJ, et al. Randomised,  
32 395 Double-blind, Placebo-controlled Trial of CCR9-targeted Leukapheresis Treatment of Ulcerative  
33 396 Colitis Patients. *J Crohns Colitis*. 2017;11(5):534-42.
- 34  
35 397 21. Hanai H, Iida T, Takeuchi K, Watanabe F, Maruyama Y, Kageoka M, et al. Intensive  
36 398 granulocyte and monocyte adsorption versus intravenous prednisolone in patients with severe  
37 399 ulcerative colitis: an unblinded randomised multi-centre controlled study. *Dig Liver Dis*.  
38 400 2008;40(6):433-40.
- 39  
40 401 22. Hanai H, Watanabe F, Yamada M, Sato Y, Takeuchi K, Iida T, et al. Adsorptive granulocyte  
41 402 and monocyte apheresis versus prednisolone in patients with corticosteroid-dependent moderately  
42 403 severe ulcerative colitis. *Digestion*. 2004;70(1):36-44.
- 43  
44 404 23. Nakamura T, Kawagoe Y, Matsuda T, Ueda A, Ueda Y, Takahashi Y, et al. Effect of  
45 405 granulocyte and monocyte adsorption apheresis on urinary albumin excretion and plasma endothelin-  
46 406 1 concentration in patients with active ulcerative colitis. *Blood Purif*. 2004;22(6):499-504.
- 47  
48 407 24. Emmrich J, Petermann S, Nowak D, Beutner I, Brock P, Klingel R, et al. Leukocytapheresis  
49 408 (LCAP) in the management of chronic active ulcerative colitis--results of a randomized pilot trial.  
50 409 *Dig Dis Sci*. 2007;52(9):2044-53.
- 51  
52 410 25. Maiden L, Takeuchi K, Baur R, Bjarnason I, O'Donohue J, Forgacs I, et al. Selective white  
53 411 cell apheresis reduces relapse rates in patients with IBD at significant risk of clinical relapse.  
54 412 *Inflamm Bowel Dis*. 2008;14(10):1413-8.
- 55  
56 413 26. Leukapheresis for inflammatory bowel disease: Interventional procedures guidance 2005  
57 414 [Available from: <https://www.nice.org.uk/guidance/ipg126>.

- 1  
2 415 27. Matsuoka K, Kobayashi T, Ueno F, Matsui T, Hirai F, Inoue N, et al. Evidence-based clinical  
3 416 practice guidelines for inflammatory bowel disease. *J Gastroenterol*. 2018;53(3):305-53.  
4  
5 417 28. Shimoyama T, Kimura K, Hiwatashi N, Matsueda K, Munakata A, Asakura H, et al. Safety  
6 418 and Efficacy of Granulocyte and Monocyte Adsorption Apheresis in Patients With Active Ulcerative  
7 419 Colitis: A Multicenter Study. *Journal of Clinical Apheresis*. 2001;16:1-9.  
8  
9 420 29. Kanke K, Nakano M, Hiraishi H, Terano A. Clinical evaluation of granulocyte/monocyte  
10 421 apheresis therapy for active ulcerative colitis. *Digestive and liver disease : official journal of the*  
11 422 *Italian Society of Gastroenterology and the Italian Association for the Study of the Liver*.  
12 423 2004;36(12):811-7.  
13  
14 424 30. Kim HJ, Kim JS, Han DS, Yang SK, Hahm KB, Lee WI, et al. [Granulocyte and monocyte  
15 425 adsorption apheresis in Korean conventional treatment-refractory patients with active ulcerative  
16 426 colitis: a prospective open-label multicenter study]. *The Korean journal of gastroenterology = Taehan*  
17 427 *Sohwagi Hakhoe chi*. 2005;45(1):34-44.  
18  
19 428 31. Shimoyama T, Sawada K, Hiwatashi N, Sawada T, Matsueda K, Munakata A, et al. Safety  
20 429 and efficacy of granulocyte and monocyte adsorption apheresis in patients with active ulcerative  
21 430 colitis: a multicenter study. *Journal of clinical apheresis*. 2001;16(1):1-9.  
22  
23 431 32. Habermalz B, Sauerland S. Clinical effectiveness of selective granulocyte, monocyte  
24 432 adsorptive apheresis with the Adacolumn device in ulcerative colitis. *Dig Dis Sci*. 2010;55(5):1421-  
25 433 8.  
26  
27 434 33. Thanaraj S, Hamlin PJ, Ford AC. Systematic review: granulocyte/monocyte adsorptive  
28 435 apheresis for ulcerative colitis. *Aliment Pharmacol Ther*. 2010;32(11-12):1297-306.  
29  
30 436 34. Yoshino T, Nakase H, Minami N, Yamada S, Matsuura M, Yazumi S, et al. Efficacy and  
31 437 safety of granulocyte and monocyte adsorption apheresis for ulcerative colitis: a meta-analysis. *Dig*  
32 438 *Liver Dis*. 2014;46(3):219-26.  
33  
34 439 35. Imperiali G, Amato A, Terpin MM, Beverina I, Bortoli A, Devani M, et al. Granulocyte-  
35 440 Monocyte Apheresis in Steroid-Dependent, Azathioprine-Intolerant/Resistant Moderate Ulcerative  
36 441 Colitis: A Prospective Multicenter Study. *Gastroenterol Res Pract*. 2017;2017:9728324.  
37  
38 442 36. Yokoyama Y, Kawai M, Fukunaga K, Kamikozuru K, Nagase K, Nogami K, et al. Looking  
39 443 for predictive factors of clinical response to adsorptive granulocyte and monocyte apheresis in  
40 444 patients with ulcerative colitis: markers of response to GMA. *BMC Gastroenterology*. 2013;13(27).  
41  
42 445 37. Tanaka T, Sugiyama S, Goishi H, Kajihara T, Akagi M, Miura T. Treatment of children and  
43 446 adolescents with ulcerative colitis by adsorptive depletion of myeloid lineage leucocytes as  
44 447 monotherapy or in combination with low dose prednisolone after failure of first-line medications.  
45 448 *BMC Gastroenterology*. 2013;13(130).  
46  
47 449 38. Dignass AU, Eriksson A, Kilander A, Pukitis A, Rhodes JM, Vavricka S. Clinical trial: five  
48 450 or ten cycles of granulocyte-monocyte apheresis show equivalent efficacy and safety in ulcerative  
49 451 colitis. *Aliment Pharmacol Ther*. 2010;31(12):1286-95.  
50  
51 452 39. Ricart E, Esteve M, Andreu M, Casellas F, Monfort D, Sans M, et al. Evaluation of 5 versus  
52 453 10 granulocyteapheresis sessions in steroid-dependent ulcerative colitis: A pilot, prospective,  
53 454 multicenter, randomized study. *World Journal of Gastroenterology*. 2007;13(15):2193-7.  
54  
55 455 40. Sakuraba A, Motoya S, Watanabe K, Nishishita M, Kanke K, Matsui T, et al. An open-label  
56 456 prospective randomized multicenter study shows very rapid remission of ulcerative colitis by



1  
2 457 intensive granulocyte and monocyte adsorptive apheresis as compared with routine weekly treatment.  
3 458 Am J Gastroenterol. 2009;104(12):2990-5.

4  
5 459 41. Bhatt A. International Council for Harmonisation E6(R2) addendum: Challenges of  
6 460 implementation. Perspectives in Clinical Research. 2017;8(4):162-6.

## 8 461 **15 Figures and tables**

9  
10 462 **Figure 1:** PRISMA flow chart representing the process of the study search and selection

11  
12 463 **Figure 2:** Forest plot of studies comparing clinical remission induction between patients with and  
13 464 without GMA as adjunctive therapy. Black diamonds represent the individual studies effect and  
14 465 vertical lines show the corresponding 95% confidence intervals. Size of the grey squares reflect on  
15 466 the weight of a particular study. The blue diamond the overall or summary effect. The outer edges of  
16 467 the diamonds represent the CIs.

18  
19 468 **Figure 3:** Forest plot of studies comparing clinical remission maintenance between patients with and  
20 469 without GMA as adjunctive therapy. Black diamonds represent the individual studies effect and  
21 470 vertical lines show the corresponding 95% confidence intervals. Size of the grey squares reflect on  
22 471 the weight of a particular study. The blue diamond the overall or summary effect. The outer edges of  
23 472 the diamonds represent the CIs.

25 473 **Table 1:** Characteristics of included studies

27 474 **Supplementary Figure 1:** Risk of bias assessment on study level in studies comparing patients with  
28 475 and without GMA as an adjunctive therapy

31 476 **Supplementary Figure 2:** Risk of bias assessment across studies comparing patients with and  
32 477 without GMA as an adjunctive therapy

34 478 **Supplementary Figure 3:** Forest plot of studies comparing clinical remission induction or clinical  
35 479 improvement between patients with and without GMA as adjunctive therapy. Black diamonds  
36 480 represent the individual studies effect and vertical lines show the corresponding 95% confidence  
37 481 intervals (8). Size of the grey squares reflect on the weight of a particular study. The blue diamond  
38 482 the overall or summary effect. The outer edges of the diamonds represent the CIs.

41 483 **Supplementary Figure 4:** Subgroup analysis based on criteria of remission in studies comparing  
42 484 clinical remission induction between patients with and without GMA as adjunctive therapy. Black  
43 485 diamonds represent the individual studies effect and vertical lines show the corresponding 95%  
44 486 confidence intervals. Size of the grey squares reflect on the weight of a particular study. The blue  
45 487 diamond the overall or summary effect. The outer edges of the diamonds represent the CIs.

48 488 **Supplementary Figure 5:** Forest plot of studies comparing frequency of adverse events between  
49 489 patients with and without GMA as adjunctive therapy. Black diamonds represent the individual  
50 490 studies effect and vertical lines show the corresponding 95% confidence intervals. Size of the grey  
51 491 squares reflect on the weight of a particular study. The blue diamond the overall or summary effect.  
52 492 The outer edges of the diamonds represent the CIs.

54 493 **Supplementary Figure 6:** Results of Trial Sequential Analysis. A: clinical remission induction, B:  
55 494 clinical remission maintenance, C: Clinical remission induction based on remission criteria, D:  
56 495 Clinical remission induction or clinical improvement

1  
2 496 **Supplementary Table 1:** List of reported adverse events.

3  
4 497 **Supplementary Table 2:** Certainty of evidence by GRADE approach

5  
6  
7  
8  
9  
10  
11  
12  
13  
14  
15  
16  
17  
18  
19  
20  
21  
22  
23  
24  
25  
26  
27  
28  
29  
30  
31  
32  
33  
34  
35  
36  
37  
38  
39  
40  
41  
42  
43  
44  
45  
46  
47  
48  
49  
50  
51  
52  
53  
54  
55  
56  
57  
58  
59  
60

For peer review only

498 **Table 1: Characteristics of included studies**

499 \* All patients received standard of care added to investigator/comparator. 1: one patient was  
 500 excluded from analysis because of protocol deviations; 2: one patient was excluded from  
 501 analysis because of protocol deviations; 3: one patient was excluded due to failure to return  
 502 blood from the column; 4: minimization may be implemented without a random element, and  
 503 this is considered to be equivalent to being random. Abbreviations:  
 504 GMA=granulocyte/monocyte apheresis; n= number; Rem=clinical remission; Res=clinical  
 505 response; CAI=Clinical Activity Index; EI=Endoscopic Index; 5-ASA=5-aminosalicylic acid;  
 506 AZA=azathioprine; PSL=prednisolone; SAS=sulfasalazine; 6-MP=6-mercaptopurine;  
 507 PSN=prednisone

| Clinical remission induction |                                                        |                              |                |                                         |                        |     |                        |    |                    |                                                                                              |                                                                                |
|------------------------------|--------------------------------------------------------|------------------------------|----------------|-----------------------------------------|------------------------|-----|------------------------|----|--------------------|----------------------------------------------------------------------------------------------|--------------------------------------------------------------------------------|
| Study Name                   | Country / Setting                                      | N <sup>o</sup> of cycles (n) | Randomization* | N <sup>o</sup> of patients analyzed (n) | Patients achieving Res |     | Patients achieving Rem |    | Time of assessment | Outcome criteria (Rem and Res)                                                               | Concomitant medication                                                         |
|                              |                                                        |                              |                |                                         | %                      | n   | %                      | n  |                    |                                                                                              |                                                                                |
| Brescia 2008                 | single center in Italy                                 | 5                            | GMA            | 40                                      | 92.5                   | 37  | 72.5                   | 29 | 5 weeks            | Rem= CAI<6; EI<4<br>Res= CAI<6; EI>4                                                         | oral 5-ASA                                                                     |
|                              |                                                        |                              | steroid        | 40                                      | 65.0                   | 26  | 50.0                   | 20 |                    |                                                                                              |                                                                                |
| Doménech 2018                | 39 centers in Austria, Germany, Italy, Portugal, Spain | 7                            | GMA+steroid    | 62 <sup>1</sup>                         | 58.1                   | 36  | 19.4                   | 12 | 12 weeks           | Rem= Mayo ≤2 and no steroid use;<br>Res=Mayo score decrease ≥3 or at least 30% from baseline | stable dose AZA and PSL were allowed if started before randomization           |
|                              |                                                        |                              | steroid        | 61 <sup>2</sup>                         | 49.2                   | 30  | 18.0                   | 11 |                    |                                                                                              |                                                                                |
| Eberhardson 2017             | single center in Sweden                                | 5                            | GMA            | 14                                      | 57.1                   | 8   | 35.7                   | 5  | 12 days            | Rem= Mayo score ≤3,<br>Res= Mayo score decrease ≥3 or at least 30% from baseline             | stable dose of steroid; 5-ASA and/or thiopurines were allowed                  |
|                              |                                                        |                              | sham           | 8 <sup>3</sup>                          | 37.5                   | 3   | 12.5                   | 1  |                    |                                                                                              |                                                                                |
| Hanai 2004                   | single center in Japan                                 | 7                            | GMA            | 46                                      | 93.5                   | 43  | 82.6                   | 38 | 12 weeks           | Rem= CAI≤4;<br>Res= CAI had fallen, but still 4<                                             | corticosteroids and/or 5-ASA/SAS                                               |
|                              |                                                        |                              | steroid        | 23                                      | 78.3                   | 18  | 65.2                   | 15 |                    |                                                                                              |                                                                                |
| Hanai 2008                   | 5 centers in Japan                                     | 11                           | GMA            | 35                                      | 80.0                   | 28  | 74.3                   | 26 | 12 weeks           | Rem= CAI≤4;<br>Res= CAI decreased by ≥5 points, but remained ≥5                              | all patients were on salicylates and the majority were on low dose PSL as well |
|                              |                                                        |                              | steroid        | 35                                      | 62.9                   | 22  | 48.6                   | 17 |                    |                                                                                              |                                                                                |
| Nakamura 2004                | single center in Japan                                 | 5                            | GMA            | 10                                      | N/A                    | N/A | 80.0                   | 8  | 6 weeks            | based on CAI, but not specified                                                              | all patients received PSL; SAS and 5-ASA was unchanged                         |
|                              |                                                        |                              | no GMA         | 10                                      | N/A                    | N/A | 20.0                   | 2  |                    |                                                                                              |                                                                                |

## GMA in ulcerative colitis

| Sands 2008<br>A study                 | 13 centers in Japan, Austria, Belgium, France, Germany, Italy, Norway, Sweden | 10                   | GMA           | 31                              | 67.7                                                             | 21 | 16.1                  | 5                      | 12 weeks                                                                                     | Rem= Mayo score $\leq 2$ ; 0-1 endoscopic score<br>Res= Mayo score decrease $\geq 3$ , | one or more of the following: 5-ASA agents, PSN, 6-MP or AZA |
|---------------------------------------|-------------------------------------------------------------------------------|----------------------|---------------|---------------------------------|------------------------------------------------------------------|----|-----------------------|------------------------|----------------------------------------------------------------------------------------------|----------------------------------------------------------------------------------------|--------------------------------------------------------------|
|                                       |                                                                               |                      | sham          | 16                              | 62.5                                                             | 10 | 18.8                  | 3                      |                                                                                              |                                                                                        |                                                              |
| Sands 2008<br>B study                 | 36 centers in the USA, Canada                                                 | 10                   | GMA           | 112                             | 60.7                                                             | 68 | 17.0                  | 19                     | 12 weeks                                                                                     | Rem= Mayo score $\leq 2$ ; 0-1 endoscopic score<br>Res= Mayo score decrease $\geq 3$   | one or more of the following: 5-ASA, PSN, 6-MP or AZA        |
|                                       |                                                                               |                      | sham          | 56                              | 50.0                                                             | 28 | 10.7                  | 6                      |                                                                                              |                                                                                        |                                                              |
| Sawada 2005 <sup>4</sup>              | 6 centers in Japan                                                            | 7                    | GMA           | 10                              | 80.0                                                             | 8  | 20.0                  | 2                      | 10 weeks                                                                                     | Rem= CAI=0;<br>Res= CAI improved $>3$                                                  | except for PSL, other medications remained unchanged         |
|                                       |                                                                               |                      | sham          | 9                               | 33.3                                                             | 3  | 11.1                  | 1                      |                                                                                              |                                                                                        |                                                              |
| <b>Clinical remission maintenance</b> |                                                                               |                      |               |                                 |                                                                  |    |                       |                        |                                                                                              |                                                                                        |                                                              |
| Study Name                            | Country/Setting                                                               | Number of cycles (n) | Randomization | Number of patients analyzed (n) | Number of patients in clinical remission at the end of the study |    | Close-out examination | Outcome criteria (Rem) | Concomitant medication                                                                       |                                                                                        |                                                              |
|                                       |                                                                               |                      |               |                                 | %                                                                | n  |                       |                        |                                                                                              |                                                                                        |                                                              |
| Emmrich 2006                          | single center in Germany                                                      | 5                    | GMA           | 8                               | 62.5                                                             | 5  | 6 months              | CAI $\leq 4$           | all patients were on PSL; 5-ASA or SAS was allowed; AZA given at baseline remained unchanged |                                                                                        |                                                              |
|                                       |                                                                               |                      | no GMA        | 5                               | 20.0                                                             | 1  |                       |                        |                                                                                              |                                                                                        |                                                              |
| Fukunaga 2012                         | single center in Japan                                                        | 12                   | GMA           | 10                              | 40.0                                                             | 4  | 12 months             | CAI $\leq 4$           | stable dose of AZA and PSL were allowed if started before randomization                      |                                                                                        |                                                              |
|                                       |                                                                               |                      | sham          | 11                              | 9.1                                                              | 1  |                       |                        |                                                                                              |                                                                                        |                                                              |
| Maiden 2008                           | 3 centers in United Kingdom                                                   | 5                    | GMA           | 18                              | 77.8                                                             | 14 | 6 months              | CAI $\leq 6$           | only 5-ASA or oral corticosteroid                                                            |                                                                                        |                                                              |

508

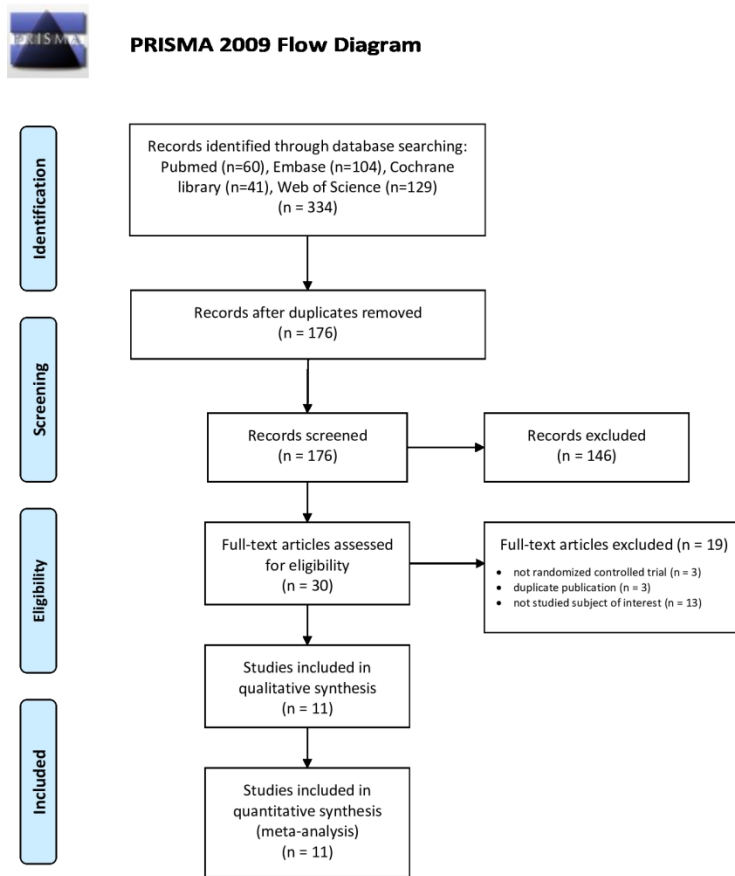

**Figure 1:** PRISMA flow chart representing the process of the study search and selection

215x279mm (200 x 200 DPI)

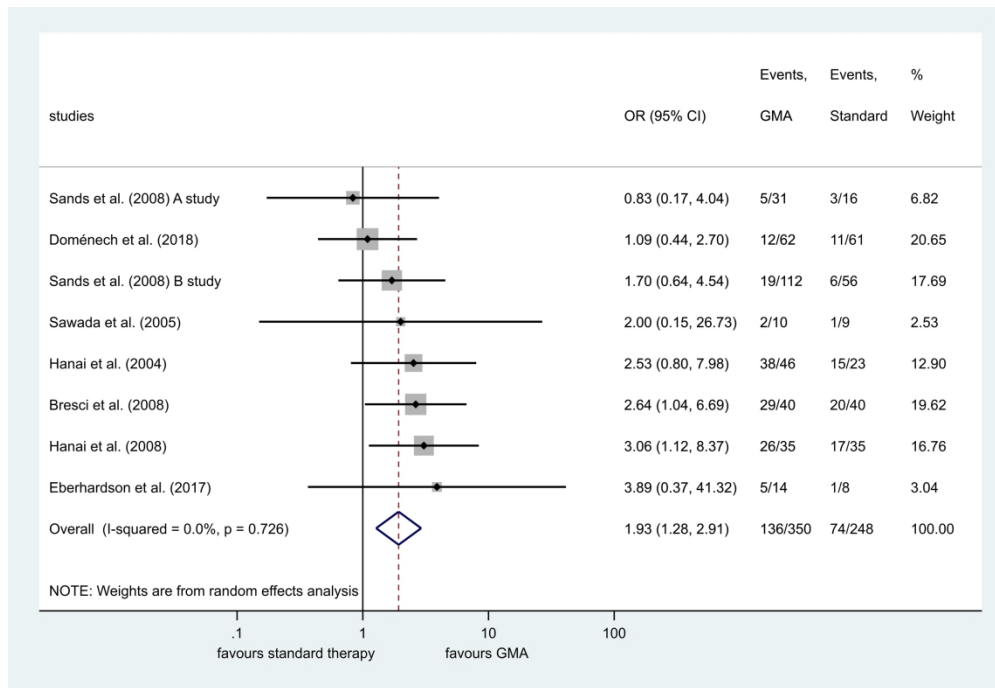

**Figure 2:** Forest plot of studies comparing clinical remission induction between patients with and without GMA as adjunctive therapy. Black diamonds represent the individual studies effect and vertical lines show the corresponding 95% confidence intervals (CI). Size of the grey squares reflect on the weight of a particular study. The blue diamond the overall or summary effect. The outer edges of the diamonds represent the CIs.

272x186mm (300 x 300 DPI)

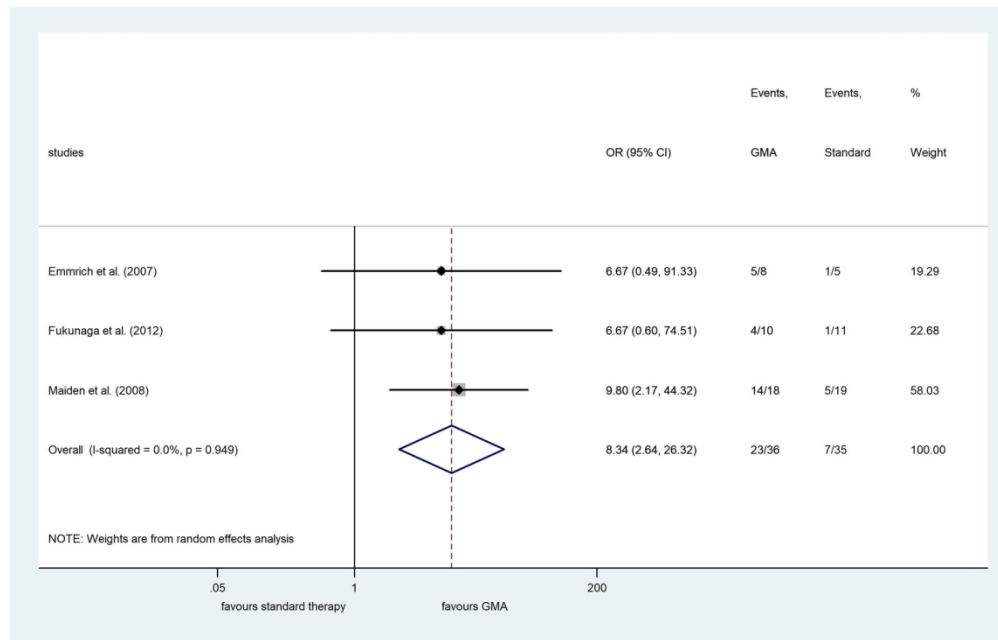

**Figure 3:** Forest plot of studies comparing clinical remission maintenance between patients with and without GMA as adjunctive therapy. Black diamonds represent the individual studies effect and vertical lines show the corresponding 95% confidence intervals (CI). Size of the grey squares reflect on the weight of a particular study. The blue diamond the overall or summary effect. The outer edges of the diamonds represent the CIs.

137x87mm (300 x 300 DPI)

# Supplementary Figure 1

1  
2  
3  
4  
5  
6  
7  
8  
9  
10  
11  
12  
13  
14  
15  
16  
17  
18  
19  
20  
21  
22  
23  
24  
25  
26  
27  
28  
29  
30  
31  
32  
33  
34  
35  
36  
37  
38  
39  
40  
41  
42  
43  
44  
45  
46  
47  
48  
49  
50  
51  
52  
53  
54  
55  
56  
57  
58  
59  
60

|                    | Random sequence generation (selection bias) | Allocation concealment (selection bias) | Blinding of participants and personnel (performance bias) | Blinding of outcome assessment (detection bias) | Incomplete outcome data (attrition bias) | Selective reporting (reporting bias) | Other bias |
|--------------------|---------------------------------------------|-----------------------------------------|-----------------------------------------------------------|-------------------------------------------------|------------------------------------------|--------------------------------------|------------|
| Bresci 2008        | ?                                           | ?                                       | -                                                         | ?                                               | +                                        | +                                    | +          |
| Doménech 2018      | +                                           | ?                                       | -                                                         | -                                               | +                                        | +                                    | +          |
| Eberhardson 2016   | ?                                           | ?                                       | ?                                                         | +                                               | +                                        | ?                                    | +          |
| Emmrich 2006       | ?                                           | ?                                       | -                                                         | ?                                               | +                                        | ?                                    | +          |
| Fukunaga 2012      | +                                           | +                                       | +                                                         | ?                                               | +                                        | +                                    | +          |
| Hanai 2004         | ?                                           | ?                                       | -                                                         | +                                               | +                                        | +                                    | +          |
| Hanai 2008         | ?                                           | ?                                       | -                                                         | +                                               | +                                        | +                                    | +          |
| Maiden 2012        | +                                           | ?                                       | -                                                         | -                                               | +                                        | ?                                    | +          |
| Nakamura 2004      | ?                                           | ?                                       | -                                                         | ?                                               | +                                        | +                                    | +          |
| Sands 2008 A study | +                                           | +                                       | +                                                         | +                                               | +                                        | +                                    | -          |
| Sands 2008 B study | +                                           | +                                       | +                                                         | +                                               | +                                        | +                                    | -          |
| Sawada 2005        | -                                           | -                                       | +                                                         | +                                               | +                                        | +                                    | +          |



# Supplementary Figure 2

1  
2  
3  
4  
5  
6  
7  
8  
9  
10  
11  
12  
13  
14  
15  
16  
17  
18  
19  
20  
21  
22  
23  
24  
25  
26  
27  
28  
29  
30  
31  
32  
33  
34  
35  
36  
37  
38  
39  
40  
41  
42  
43  
44  
45  
46  
47  
48  
49  
50  
51  
52  
53  
54  
55  
56  
57  
58  
59  
60

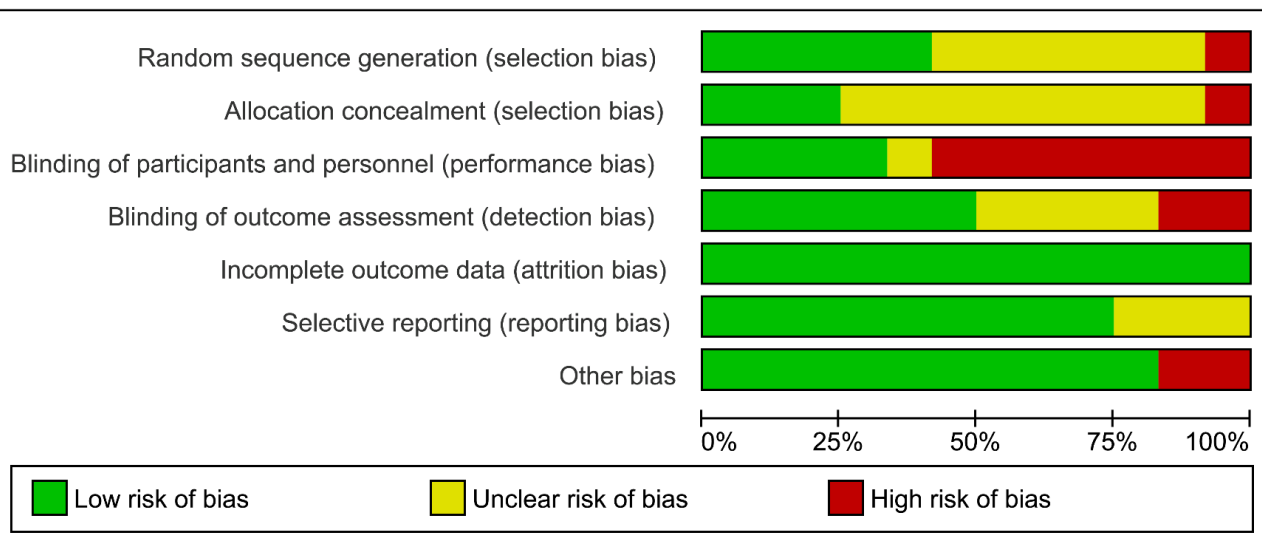

# Supplementary Figure 3

1  
2  
3  
4  
5  
6  
7  
8  
9  
10  
11  
12  
13  
14  
15  
16  
17  
18  
19  
20  
21  
22  
23  
24  
25  
26  
27  
28  
29  
30  
31  
32  
33  
34  
35  
36  
37  
38  
39  
40  
41  
42  
43  
44  
45  
46  
47  
48  
49  
50  
51  
52  
53  
54  
55  
56  
57  
58  
59  
60

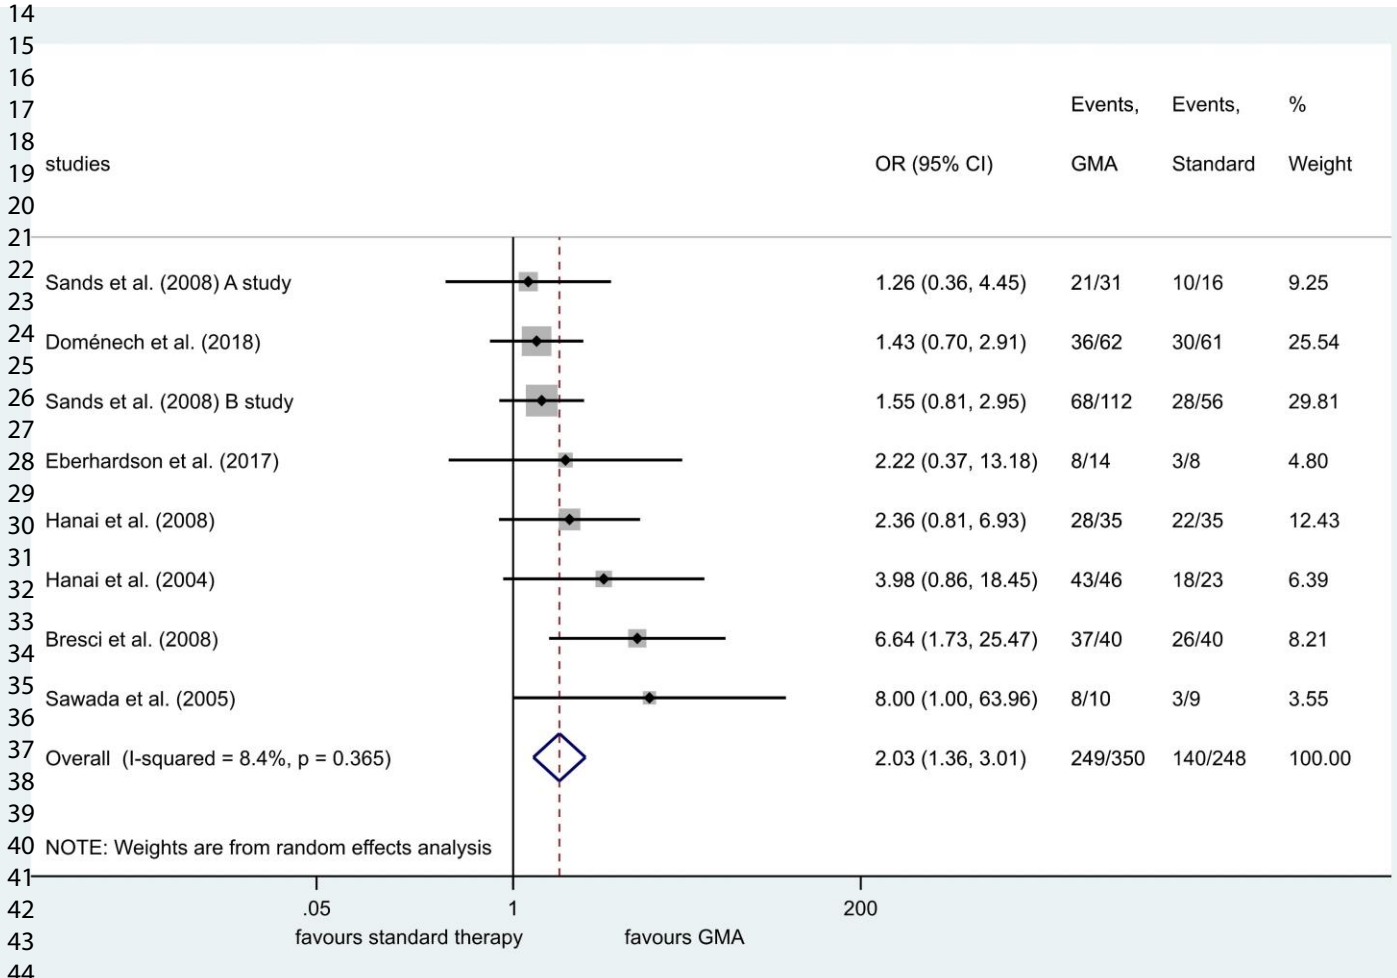

# Supplementary Figure 4

1  
2  
3  
4  
5  
6  
7  
8  
9  
10  
11  
12  
13  
14  
15  
16  
17  
18  
19  
20  
21  
22  
23  
24  
25  
26  
27  
28  
29  
30  
31  
32  
33  
34  
35  
36  
37  
38  
39  
40  
41  
42  
43  
44  
45  
46  
47  
48  
49  
50  
51  
52  
53  
54  
55  
56  
57  
58  
59  
60

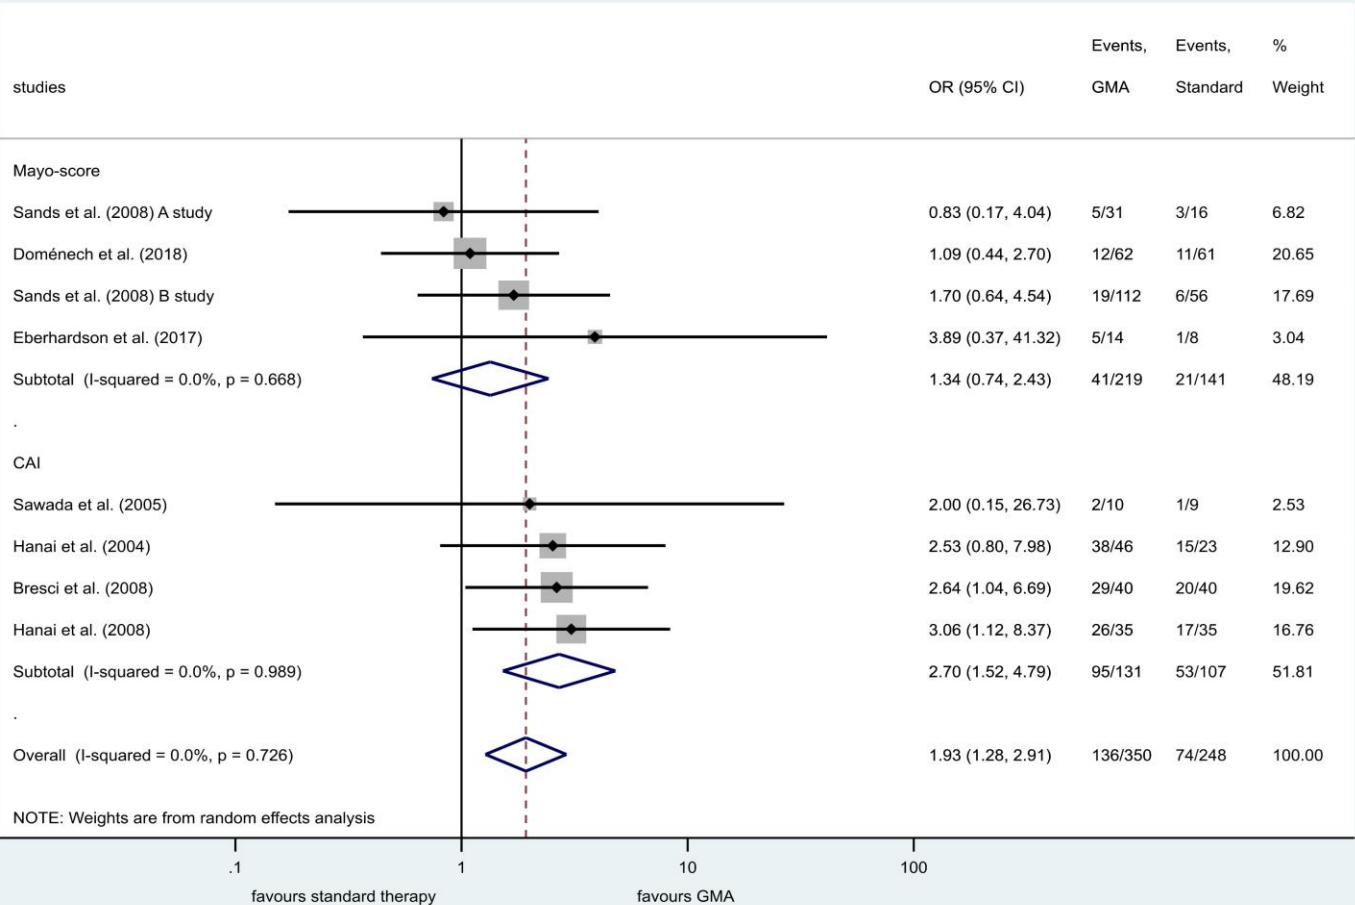

# Supplementary Figure 5

1  
2  
3  
4  
5  
6  
7  
8  
9  
10  
11  
12  
13  
14  
15  
16  
17  
18  
19  
20  
21  
22  
23  
24  
25  
26  
27  
28  
29  
30  
31  
32  
33  
34  
35  
36  
37  
38  
39  
40  
41  
42  
43  
44  
45  
46  
47  
48  
49  
50  
51  
52  
53  
54  
55  
56  
57  
58  
59  
60

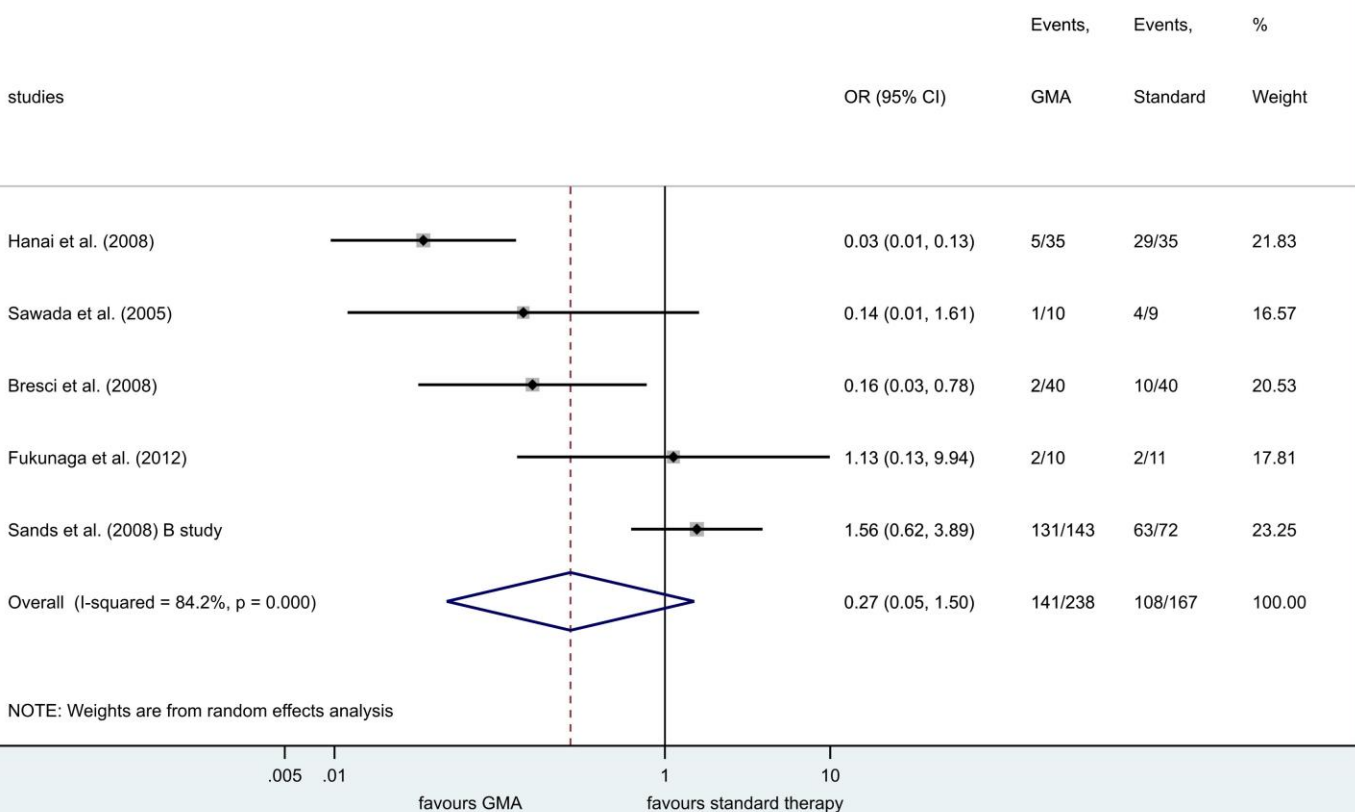

# Supplementary Figure 6

1  
2  
3  
4  
5  
6  
7  
8  
9  
10  
11  
12  
13  
14  
15  
16  
17  
18  
19  
20  
21  
22  
23  
24  
25  
26  
27  
28  
29  
30  
31  
32  
33  
34  
35  
36  
37  
38  
39  
40  
41  
42  
43  
44  
45  
46  
47  
48  
49  
50  
51  
52  
53  
54  
55  
56  
57  
58  
59  
60

**A**

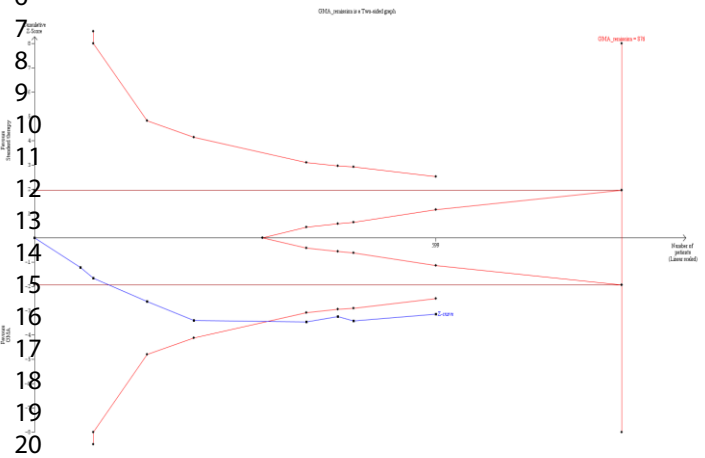

**B**

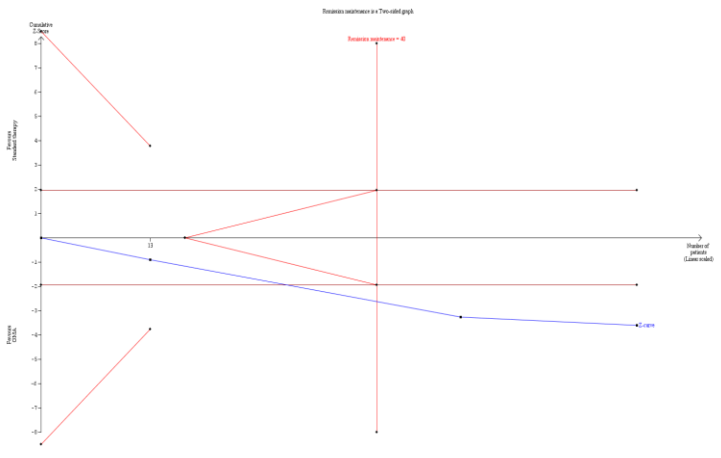

**C**

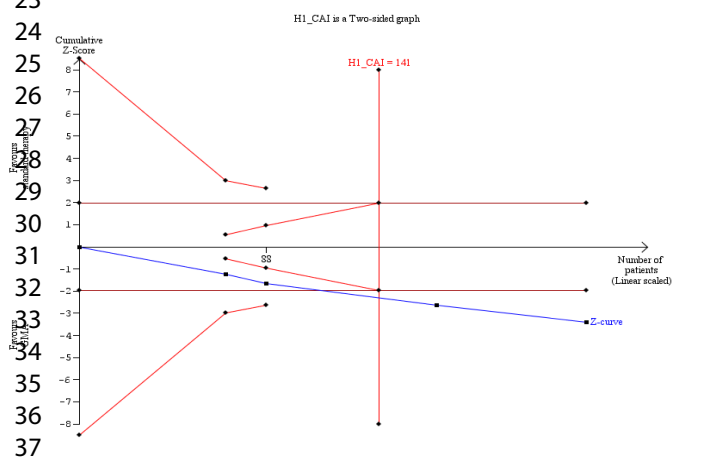

**D**

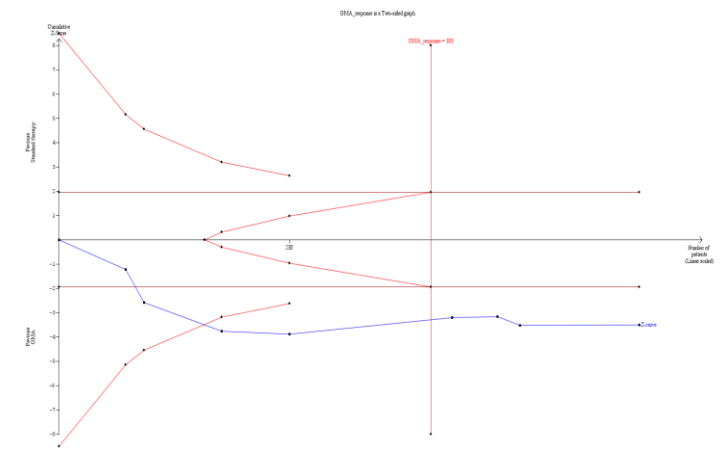

# Supplementary Table 1

|                      |                                                                                                                                                                                                                                                                   |
|----------------------|-------------------------------------------------------------------------------------------------------------------------------------------------------------------------------------------------------------------------------------------------------------------|
| Hanai et al. 2004    | flushing, nausea, mild fever                                                                                                                                                                                                                                      |
| Sawada et al. 2005   | fever, skin rash, back pain                                                                                                                                                                                                                                       |
| Bresci et al. 2008   | headache, gastrointestinal intolerance, facies lunaris, vascular hypertension, glucose intolerance                                                                                                                                                                |
| Fukunaga et al. 2012 | nausea, skin itchiness                                                                                                                                                                                                                                            |
| Sands et al. 2008    | headache, disease flare-up, decreased diastolic blood pressure, nasopharyngitis, hypotension, nausea, fatigue, post procedure hematoma, abdominal pain, dizziness, vomiting, vessel puncture site bruise, diarrhea, upper respiratory tract infection, flatulence |

## Supplementary Table 2

| Certainty assessment                                                  |                   |              |               |                           |                             |                                     | № of patients                                                                      |                                                   | Effect                            |                                                              | Certainty        | Importance |
|-----------------------------------------------------------------------|-------------------|--------------|---------------|---------------------------|-----------------------------|-------------------------------------|------------------------------------------------------------------------------------|---------------------------------------------------|-----------------------------------|--------------------------------------------------------------|------------------|------------|
| № of studies                                                          | Study design      | Risk of bias | Inconsistency | Indirectness              | Imprecision                 | Other considerations                | standard therapy for clinical remission induction and GMA as an adjunctive therapy | standard therapy for clinical remission induction | Relative (95% CI)                 | Absolute (95% CI)                                            |                  |            |
| <b>Clinical remission rate (assessed with: CAI or Mayo-score)</b>     |                   |              |               |                           |                             |                                     |                                                                                    |                                                   |                                   |                                                              |                  |            |
| 10                                                                    | randomised trials | serious      | not serious   | not serious               | not serious                 | none                                | 136/350 (38.9%)                                                                    | 74/249 (29.7%)                                    | <b>OR 1.94</b><br>(1.28 to 2.92)  | <b>153 more per 1 000</b><br>(from 54 more to 255 more)      | ⊕⊕⊕○<br>MODERATE | CRITICAL   |
| <b>Clinical response and clinical improvement (CAI or Mayo-score)</b> |                   |              |               |                           |                             |                                     |                                                                                    |                                                   |                                   |                                                              |                  |            |
| 15                                                                    | randomised trials | serious      | not serious   | not serious               | not serious                 | none                                | 249/350 (71.1%)                                                                    | 140/249 (56.2%)                                   | <b>OR 2.05</b><br>(1.37 to 3.06)  | <b>162 more per 1 000</b><br>(from 75 more to 235 more)      | ⊕⊕⊕○<br>MODERATE | CRITICAL   |
| <b>Clinical remission maintenance rate (assessed with: CAI)</b>       |                   |              |               |                           |                             |                                     |                                                                                    |                                                   |                                   |                                                              |                  |            |
| 20                                                                    | randomised trials | serious      | not serious   | serious <sup>a</sup>      | not serious                 | none                                | 39/36 (108.3%)                                                                     | 17/35 (48.6%)                                     | <b>OR 8.34</b><br>(2.64 to 26.32) | <b>402 more per 1 000</b><br>(from 228 more to 476 more)     | ⊕⊕○○<br>LOW      | CRITICAL   |
| <b>Adverse events</b>                                                 |                   |              |               |                           |                             |                                     |                                                                                    |                                                   |                                   |                                                              |                  |            |
| 25                                                                    | randomised trials | very serious | not serious   | very serious <sup>b</sup> | very serious <sup>c,d</sup> | publication bias strongly suspected | 141/238 (59.2%)                                                                    | 108/167 (64.7%)                                   | <b>OR 0.27</b><br>(0.05 to 1.50)  | <b>316 fewer per 1 000</b><br>(from 563 fewer to 86 more)    | ⊕○○○<br>VERY LOW | IMPORTANT  |
| <b>Steroid-sparing effect</b>                                         |                   |              |               |                           |                             |                                     |                                                                                    |                                                   |                                   |                                                              |                  |            |
| 30                                                                    | randomised trials | serious      | not serious   | not serious               | very serious <sup>d</sup>   | none                                | 66                                                                                 | 43                                                | -                                 | <b>WMD 6.83 mg/day lower</b><br>(14.47 lower to 0.81 higher) | ⊕○○○<br>VERY LOW | IMPORTANT  |

CI: Confidence interval; OR: Odds ratio

### Explanations

a. Duration of follow-up differs among studies (6 months or 12 months). b. Pool of adverse events differs among studies. c. The optimal information size criterion is not met. d. TSA could not be carried out.

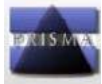

# PRISMA 2009 Checklist

| Section/topic                      | #  | Checklist item                                                                                                                                                                                                                                                                                              | Reported on page #   |
|------------------------------------|----|-------------------------------------------------------------------------------------------------------------------------------------------------------------------------------------------------------------------------------------------------------------------------------------------------------------|----------------------|
| <b>TITLE</b>                       |    |                                                                                                                                                                                                                                                                                                             |                      |
| Title                              | 1  | Identify the report as a systematic review, meta-analysis, or both.                                                                                                                                                                                                                                         | Page 1               |
| <b>ABSTRACT</b>                    |    |                                                                                                                                                                                                                                                                                                             |                      |
| Structured summary                 | 2  | Provide a structured summary including, as applicable: background; objectives; data sources; study eligibility criteria, participants, and interventions; study appraisal and synthesis methods; results; limitations; conclusions and implications of key findings; systematic review registration number. | Page 2               |
| <b>INTRODUCTION</b>                |    |                                                                                                                                                                                                                                                                                                             |                      |
| Rationale                          | 3  | Describe the rationale for the review in the context of what is already known.                                                                                                                                                                                                                              | Page 3               |
| Objectives                         | 4  | Provide an explicit statement of questions being addressed with reference to participants, interventions, comparisons, outcomes, and study design (PICOS).                                                                                                                                                  | Page 3-4             |
| <b>METHODS</b>                     |    |                                                                                                                                                                                                                                                                                                             |                      |
| Protocol and registration          | 5  | Indicate if a review protocol exists, if and where it can be accessed (e.g., Web address), and, if available, provide registration information including registration number.                                                                                                                               | Page 3               |
| Eligibility criteria               | 6  | Specify study characteristics (e.g., PICOS, length of follow-up) and report characteristics (e.g., years considered, language, publication status) used as criteria for eligibility, giving rationale.                                                                                                      | Page 4               |
| Information sources                | 7  | Describe all information sources (e.g., databases with dates of coverage, contact with study authors to identify additional studies) in the search and date last searched.                                                                                                                                  | Page 3               |
| Search                             | 8  | Present full electronic search strategy for at least one database, including any limits used, such that it could be repeated.                                                                                                                                                                               | Page 3-4<br>Figure 1 |
| Study selection                    | 9  | State the process for selecting studies (i.e., screening, eligibility, included in systematic review, and, if applicable, included in the meta-analysis).                                                                                                                                                   | Page 4<br>Figure 1   |
| Data collection process            | 10 | Describe method of data extraction from reports (e.g., piloted forms, independently, in duplicate) and any processes for obtaining and confirming data from investigators.                                                                                                                                  | Page 4               |
| Data items                         | 11 | List and define all variables for which data were sought (e.g., PICOS, funding sources) and any assumptions and simplifications made.                                                                                                                                                                       | Page 4               |
| Risk of bias in individual studies | 12 | Describe methods used for assessing risk of bias of individual studies (including specification of whether this was done at the study or outcome level), and how this information is to be used in any data synthesis.                                                                                      | Page 4-5             |
| Summary measures                   | 13 | State the principal summary measures (e.g., risk ratio, difference in means).                                                                                                                                                                                                                               | Page 5               |
| Synthesis of results               | 14 | Describe the methods of handling data and combining results of studies, if done, including measures of consistency (e.g., I <sup>2</sup> ) for each meta-analysis.                                                                                                                                          | Page 5               |



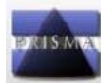

# PRISMA 2009 Checklist

| Section/topic                 | #  | Checklist item                                                                                                                                                                                           | Reported on page #                           |
|-------------------------------|----|----------------------------------------------------------------------------------------------------------------------------------------------------------------------------------------------------------|----------------------------------------------|
| Risk of bias across studies   | 15 | Specify any assessment of risk of bias that may affect the cumulative evidence (e.g., publication bias, selective reporting within studies).                                                             | Page 4-5                                     |
| Additional analyses           | 16 | Describe methods of additional analyses (e.g., sensitivity or subgroup analyses, meta-regression), if done, indicating which were pre-specified.                                                         | Page                                         |
| <b>RESULTS</b>                |    |                                                                                                                                                                                                          |                                              |
| Study selection               | 17 | Give numbers of studies screened, assessed for eligibility, and included in the review, with reasons for exclusions at each stage, ideally with a flow diagram.                                          | Page 5<br>Figure 1                           |
| Study characteristics         | 18 | For each study, present characteristics for which data were extracted (e.g., study size, PICOS, follow-up period) and provide the citations.                                                             | Page 5-6<br>Table 1                          |
| Risk of bias within studies   | 19 | Present data on risk of bias of each study and, if available, any outcome level assessment (see item 12).                                                                                                | Page 6<br>Suppl. Figure 1                    |
| Results of individual studies | 20 | For all outcomes considered (benefits or harms), present, for each study: (a) simple summary data for each intervention group (b) effect estimates and confidence intervals, ideally with a forest plot. | Page 6<br>Figure 2-3<br>Suppl. Figure 3-5    |
| Synthesis of results          | 21 | Present the main results of the review. If meta-analyses are done, include for each, confidence intervals and measures of consistency.                                                                   | Page 6<br>Figure 2-3<br>Suppl. Figure 3-5    |
| Risk of bias across studies   | 22 | Present results of any assessment of risk of bias across studies (see Item 15).                                                                                                                          | Page 6<br>Suppl. Figure 2                    |
| Additional analysis           | 23 | Give results of additional analyses, if done (e.g., sensitivity or subgroup analyses, meta-regression [see Item 16]).                                                                                    | Page 7<br>Suppl. Figure 4<br>Suppl. Figure 6 |
| <b>DISCUSSION</b>             |    |                                                                                                                                                                                                          |                                              |
| Summary of evidence           | 24 | Summarize the main findings including the strength of evidence for each main outcome; consider their relevance to key groups (e.g., healthcare providers, users, and policy makers).                     | Page 7&9<br>Suppl. Table 2                   |
| Limitations                   | 25 | Discuss limitations at study and outcome level (e.g., risk of bias), and at review-level (e.g., incomplete retrieval of identified research, reporting bias).                                            | Page 2&8                                     |

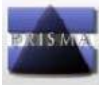

# PRISMA 2009 Checklist

1  
2  
3  
4  
5  
6  
7  
8  
9  
10  
11  
12  
13  
14  
15  
16  
17  
18  
19  
20  
21  
22  
23  
24  
25  
26  
27  
28  
29  
30  
31  
32  
33  
34  
35  
36  
37  
38  
39  
40  
41  
42  
43  
44  
45  
46  
47

|                |    |                                                                                                                                            |        |
|----------------|----|--------------------------------------------------------------------------------------------------------------------------------------------|--------|
| Conclusions    | 26 | Provide a general interpretation of the results in the context of other evidence, and implications for future research.                    | Page 9 |
| <b>FUNDING</b> |    |                                                                                                                                            |        |
| Funding        | 27 | Describe sources of funding for the systematic review and other support (e.g., supply of data); role of funders for the systematic review. | Page 9 |

From: Moher D, Liberati A, Tetzlaff J, Altman DG, The PRISMA Group (2009). Preferred Reporting Items for Systematic Reviews and Meta-Analyses: The PRISMA Statement. PLoS Med 6(7): e1000097. doi:10.1371/journal.pmed1000097

For peer review only

# BMJ Open

## Granulocyte and monocyte apheresis as an adjunctive therapy to induce and maintain clinical remission in ulcerative colitis: A systematic review and meta-analysis

|                                 |                                                                                                                                                                                                                                                                                                                                                                                                                                                                                                                                                                                                                                                                                                                                                                                                                                                                                                                                                                                                                                                                                                                                                                                                                                                                                                                                                                                                                                                                                                                                                                                                                   |
|---------------------------------|-------------------------------------------------------------------------------------------------------------------------------------------------------------------------------------------------------------------------------------------------------------------------------------------------------------------------------------------------------------------------------------------------------------------------------------------------------------------------------------------------------------------------------------------------------------------------------------------------------------------------------------------------------------------------------------------------------------------------------------------------------------------------------------------------------------------------------------------------------------------------------------------------------------------------------------------------------------------------------------------------------------------------------------------------------------------------------------------------------------------------------------------------------------------------------------------------------------------------------------------------------------------------------------------------------------------------------------------------------------------------------------------------------------------------------------------------------------------------------------------------------------------------------------------------------------------------------------------------------------------|
| Journal:                        | <i>BMJ Open</i>                                                                                                                                                                                                                                                                                                                                                                                                                                                                                                                                                                                                                                                                                                                                                                                                                                                                                                                                                                                                                                                                                                                                                                                                                                                                                                                                                                                                                                                                                                                                                                                                   |
| Manuscript ID                   | bmjopen-2020-042374.R1                                                                                                                                                                                                                                                                                                                                                                                                                                                                                                                                                                                                                                                                                                                                                                                                                                                                                                                                                                                                                                                                                                                                                                                                                                                                                                                                                                                                                                                                                                                                                                                            |
| Article Type:                   | Original research                                                                                                                                                                                                                                                                                                                                                                                                                                                                                                                                                                                                                                                                                                                                                                                                                                                                                                                                                                                                                                                                                                                                                                                                                                                                                                                                                                                                                                                                                                                                                                                                 |
| Date Submitted by the Author:   | 25-Jan-2021                                                                                                                                                                                                                                                                                                                                                                                                                                                                                                                                                                                                                                                                                                                                                                                                                                                                                                                                                                                                                                                                                                                                                                                                                                                                                                                                                                                                                                                                                                                                                                                                       |
| Complete List of Authors:       | <p>Kiss, Szabolcs; University of Szeged, Doctoral School of Clinical Medicine; University of Pecs Medical School, Institute for Translational Medicine</p> <p>Németh, Dávid; University of Pecs Medical School, Institute for Translational Medicine</p> <p>Hegyi, Péter; University of Pecs Medical School, Institute for Translational Medicine; University of Pecs, János Szentágotthai Research Centre</p> <p>Földi, Mária ; Szegedi Tudományegyetem, Doctoral School of Clinical Medicine, University of Szeged; University of Pecs Medical School, Institute for Translational Medicine</p> <p>Szakács, Zsolt; University of Pecs Medical School, Institute for Translational Medicine; University of Pecs, János Szentágotthai Research Centre</p> <p>Erőss, Bálint; University of Pecs Medical School, Institute for Translational Medicine; University of Pecs, János Szentágotthai Research Centre</p> <p>Tinusz, Benedek; University of Pecs Medical School, First Department of Medicine</p> <p>Hegyi, Péter Jenő; University of Pecs Medical School, Institute for Translational Medicine; University of Pecs Medical School, Division of Gastroenterology, First Department of Medicine</p> <p>Sarlós, Patrícia; University of Pecs Medical School, Institute for Translational Medicine; University of Pecs Medical School, Division of Gastroenterology, First Department of Medicine</p> <p>Hussain, Alizadeh; Szegedi Tudományegyetem, Doctoral School of Clinical Medicine, University of Szeged; University of Pecs Medical School, Division of Haematology, First Department of Medicine</p> |
| <b>Primary Subject Heading</b>: | Gastroenterology and hepatology                                                                                                                                                                                                                                                                                                                                                                                                                                                                                                                                                                                                                                                                                                                                                                                                                                                                                                                                                                                                                                                                                                                                                                                                                                                                                                                                                                                                                                                                                                                                                                                   |
| Secondary Subject Heading:      | Haematology (incl blood transfusion)                                                                                                                                                                                                                                                                                                                                                                                                                                                                                                                                                                                                                                                                                                                                                                                                                                                                                                                                                                                                                                                                                                                                                                                                                                                                                                                                                                                                                                                                                                                                                                              |
| Keywords:                       | Inflammatory bowel disease < GASTROENTEROLOGY, IMMUNOLOGY, Gastroenterology < INTERNAL MEDICINE, HAEMATOLOGY                                                                                                                                                                                                                                                                                                                                                                                                                                                                                                                                                                                                                                                                                                                                                                                                                                                                                                                                                                                                                                                                                                                                                                                                                                                                                                                                                                                                                                                                                                      |
|                                 |                                                                                                                                                                                                                                                                                                                                                                                                                                                                                                                                                                                                                                                                                                                                                                                                                                                                                                                                                                                                                                                                                                                                                                                                                                                                                                                                                                                                                                                                                                                                                                                                                   |

1  
2  
3  
4  
5  
6  
7  
8  
9  
10  
11  
12  
13  
14  
15  
16  
17  
18  
19  
20  
21  
22  
23  
24  
25  
26  
27  
28  
29  
30  
31  
32  
33  
34  
35  
36  
37  
38  
39  
40  
41  
42  
43  
44  
45  
46  
47  
48  
49  
50  
51  
52  
53  
54  
55  
56  
57  
58  
59  
60

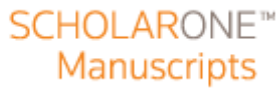



I, the Submitting Author has the right to grant and does grant on behalf of all authors of the Work (as defined in the below author licence), an exclusive licence and/or a non-exclusive licence for contributions from authors who are: i) UK Crown employees; ii) where BMJ has agreed a CC-BY licence shall apply, and/or iii) in accordance with the terms applicable for US Federal Government officers or employees acting as part of their official duties; on a worldwide, perpetual, irrevocable, royalty-free basis to BMJ Publishing Group Ltd ("BMJ") its licensees and where the relevant Journal is co-owned by BMJ to the co-owners of the Journal, to publish the Work in this journal and any other BMJ products and to exploit all rights, as set out in our [licence](#).

The Submitting Author accepts and understands that any supply made under these terms is made by BMJ to the Submitting Author unless you are acting as an employee on behalf of your employer or a postgraduate student of an affiliated institution which is paying any applicable article publishing charge ("APC") for Open Access articles. Where the Submitting Author wishes to make the Work available on an Open Access basis (and intends to pay the relevant APC), the terms of reuse of such Open Access shall be governed by a Creative Commons licence – details of these licences and which [Creative Commons](#) licence will apply to this Work are set out in our licence referred to above.

Other than as permitted in any relevant BMJ Author's Self Archiving Policies, I confirm this Work has not been accepted for publication elsewhere, is not being considered for publication elsewhere and does not duplicate material already published. I confirm all authors consent to publication of this Work and authorise the granting of this licence.

1  
2  
3  
4  
5  
6  
7  
8

# Granulocyte and monocyte apheresis as an adjunctive therapy to induce and maintain clinical remission in ulcerative colitis: A systematic review and meta-analysis

9 1 Szabolcs Kiss<sup>1,2</sup>, Dávid Németh<sup>2</sup>, Péter Hegyi<sup>2,3</sup>, Mária Földi<sup>1,2</sup>, Zsolt Szakács<sup>2,3</sup>, Bálint Erőss<sup>2,3</sup>,  
10 2 Benedek Tinusz<sup>4</sup>, Péter Jenő Hegyi<sup>2,5</sup>, Patrícia Sarlós<sup>2,5</sup>, Hussain Alizadeh<sup>1,6\*</sup>

11  
12 3 <sup>1</sup>Doctoral School of Clinical Medicine, University of Szeged, Szeged, Hungary

13  
14 4 <sup>2</sup>Institute for Translational Medicine, Medical School, University of Pécs, Pécs, Hungary

15  
16 5 <sup>3</sup>János Szentágotthai Research Centre, University of Pécs, Pécs, Hungary

17  
18 6 <sup>4</sup>First Department of Medicine, Medical School, University of Pécs, Pécs, Hungary

19  
20 7 <sup>5</sup>Division of Gastroenterology, First Department of Medicine, Medical School, University of Pécs,  
21 8 Pécs, Hungary

22  
23 9 <sup>6</sup>Division of Haematology, First Department of Medicine, Medical School, University of Pécs, Pécs,  
24 10 Hungary

25  
26 11 \* **Correspondence:**

27 12 Alizadeh Hussain M.D., Ph.D., Address: First Department of Medicine, University of Pécs Medical  
28 13 School, H-7624 Pécs, Ifjúság útja 13., Hungary; Tel: +(36-30) 643-6099

29 14 E-mail: alizadeh.hussain@pte.hu

30  
31 15 **Keywords:** Inflammatory bowel disease; IMMUNOLOGY; Gastroenterology;  
32 16 HAEMATOLOGY

## 1 Abstract

**Objective:** The goal of treatment in ulcerative colitis (UC) is to induce and maintain remission. The addition of granulocyte and monocyte apheresis (GMA) to conventional therapy may be a promising therapeutic alternative. In this meta-analysis, we aimed to assess the efficacy and safety profile of GMA as an adjunctive therapy.

**Design:** Systematic review and meta-analysis.

**Methods:** We searched four databases (MEDLINE, Embase, Web of Science, and Cochrane Central Register of Controlled Trials) for randomized or minimized controlled trials which discussed the impact of additional GMA therapy on clinical remission induction and clinical remission maintenance compared to conventional therapy alone. Primary outcome were clinical remission induction and maintenance, secondary outcomes were adverse events and steroid-sparing effect. Odds ratios (OR) with 95% confidence intervals were calculated. Trial Sequential Analyses (TSA) were performed to adjust for the risk of random errors in meta-analyses.

**Results:** A total of eleven studies were eligible for meta-analysis. GMA was clearly demonstrated to induce and maintain clinical remission more effectively than conventional therapy alone (598 patients: OR: 1.93, CI: 1.28–2.91,  $p=0.002$ ,  $I^2=0.0\%$  for induction; 71 patients: OR: 8.34, CI: 2.64–26.32,  $p<0.001$ ,  $I^2=0.0\%$  for maintenance). There was no statistically significant difference in the number of adverse events (OR: 0.27, CI: 0.05–1.50,  $p=0.135$ ,  $I^2=84.2\%$ )

**Conclusion:** GMA appears to be more effective as an adjunctive treatment in inducing and maintaining remission in UC patients than conventional therapy alone.

**Protocol registration number:** PROSPERO CRD42019134050.

Word count: 4186

## 2 Article Summary

### Strengths and limitations of this study

- This is the first meta-analysis assessing the role of GMA in clinical remission maintenance in ulcerative colitis.
- Grading of Recommendations Assessment, Development and Evaluation approach was applied to appraise the certainty of evidence.
- Our results are limited by the relatively low number of patients and the heterogenous reporting of adverse events.
- To address the limitation by the number of included patients and to control both type I and type II errors, Trial Sequential Analyses have been performed.

### 3 Introduction

Ulcerative colitis (UC) is one of two major types of inflammatory bowel disease (IBD). The incidence of this disease varies from nine to 20 cases per 100 000 person-years (1). UC is a lifelong illness that has a profound impact on patients. The primary goal of treatment is to achieve and maintain remission, thereby preventing colectomy and colorectal neoplasms and ensuring an acceptable quality of life (2). The choice of treatment for patients with UC is tied to the clinical and endoscopic severity of the disease along with the frequency and severity of relapses. Patients with no response to conventional therapies, especially to corticosteroids and immunosuppressive agents, are common candidates for biological treatments and/or surgery. However, both of these options are challenged by the high costs and incidence of side-effects and complications.

Patients with UC usually have a raised level of granulocytes, and, in the case of an active disease, the mucosa of the bowel is infiltrated by a large number of granulocytes and macrophages. These leukocytes release degradative enzymes and proinflammatory cytokines, which lead to further inflammation of the bowel. Based on the hypothesis that a reduction of activated granulocytes and monocytes/macrophages may be beneficial, granulocyte-monocyte apheresis (GMA) was proposed as a strategy to promote remission in active UC (3). GMA is a novel non-pharmacological treatment tool for patients with UC, comprising an extra-corporeal absorptive circuit, which decreases inflammatory cytokines and upregulates regulatory T cells. Despite its high cost, GMA seems to have a good safety profile (3).

However, data on the efficacy of GMA are still debated. The first studies published in Japan showed remission or response rates of up to 60–80% (4-6). Sands et al. reported a study with a large number of patients comparing GMA to a placebo, and they found no significant difference in terms of clinical response (7). This substantial difference between studies could be explained by the heterogeneity of patients' characteristics, most probably by the varying severity and extent of the disease.

A large proportion of patients require long-term, high-dose steroid treatment, which often results in severe side-effects impairing patients' quality of life. If addition of GMA can reduce the dose of corticosteroids, the risk of steroid-induced adverse events (AEs) could be minimized. Therefore, it is also essential to evaluate the steroid-sparing effects of GMA (8). Beyond the induction of remission and the impact on steroid requirement, the role of GMA in maintaining remission is unclear (9). The aim of our study was to assess the role of GMA in the induction and maintenance of clinical remission in UC and to evaluate the potential steroid-sparing effect of the therapy.

### 4 Methods

The meta-analysis was reported in accordance with the Preferred Reporting Items for Systematic Reviews and Meta-Analyses Statement (10). The review protocol was registered on the PROSPERO International Prospective Register of Systematic Reviews (CRD42019134050).

#### 4.1 Search strategy

The systematic literature search was conducted by two independent reviewers (KS and FM) in MEDLINE (via PubMed), EMBASE, Cochrane Central Register of Controlled Trials (CENTRAL), and Web of Science for studies published up to 5<sup>th</sup> March 2019. The search query in each database was based on PICO components combined with Boolean operators: (gma OR apheresis OR adsorption OR "cell separation" OR leukapher\* OR leukopher\* OR leukocytapher\* OR leukocytopher\* OR lymphapher\* OR lymphopher\* OR lymphocytopher\* OR lymphocytapher\*) AND ("inflammatory



92 bowel disease” OR “ulcerative colitis”) AND (random\*). Details of our search strategy and terms are  
93 presented in supplementary material.

## 94 4.2 Eligibility criteria

95 General criteria: a randomized controlled trial (RCT) or minimized controlled trial (This type of  
96 sequence generation is considered to be nearly equivalent to being random) (11); only full-text articles  
97 were included.

98 Specific criteria for clinical remission induction: patients with active UC (*Population<sub>1</sub>*),  
99 standard therapy for remission induction and GMA as an adjunctive therapy (*Intervention<sub>1</sub>*), and  
100 standard therapy for remission induction (*Comparison<sub>1</sub>*); *Outcomes<sub>1</sub>*: clinical response rate and clinical  
101 remission rate (defined either by the clinical activity index (CAI) or full Mayo score) and AEs.

102 Specific criteria for clinical remission maintenance: patients with UC in clinical remission  
103 induced by GMA (*Population<sub>2</sub>*), standard therapy for remission maintenance and GMA as an  
104 adjunctive therapy (*Intervention<sub>2</sub>*), and standard therapy for remission maintenance (*Comparison<sub>2</sub>*);  
105 *Outcomes<sub>2</sub>*: rate of maintained remission (defined either by the CAI or full Mayo score) and AEs.

106 Outcome criteria for clinical remission and clinical response were defined individually by the  
107 eligible articles. These criteria are presented in **Table 1**. Regarding safety, AEs reported by the  
108 individual article were used for the analyses in each case. No preliminary specification was made.

109 The titles of the studies were screened based on predefined criteria, and the relevant studies  
110 were selected for abstract review. If the abstract was found to be appropriate, the full text of the article  
111 was studied. The decision to include a study in the meta-analysis was based on an independent  
112 assessment by the two reviewers and eventually by consensus for resolution of any disagreements.  
113 Reference lists in included studies and reviews on this topic were searched for additional studies.  
114 Publications citing the included studies were also screened in the Google Scholar academic search  
115 engine.

## 116 4.3 Data extraction

117 The two investigators (KS and FM) reviewed the articles independently and extracted data into a  
118 standardized data collection form (discrepancies were resolved based on consensus). For the selected  
119 studies, characteristics were extracted, including publication year, country, number of centres, number  
120 of patients, and study design. In addition, patient characteristics (age, sex, and extent of disease), details  
121 of therapy (concomitant medication, volume of GMA, number of GMA cycles, and duration of  
122 treatment), and main outcomes (number of patients with clinical improvement/response, number of  
123 patients achieving clinical remission, number of patients with maintained remission, and number of  
124 AEs) were also extracted.

## 125 4.4 Risk of bias assessment

126 The Cochrane Risk of Bias Tool was used by the two independent investigators (KS and FM) to assess  
127 the quality of the studies included. Any disagreement was resolved based on consensus (12). Major  
128 domains of quality assessment were the following:

- 129 1. Random sequence generation (selection bias)
- 130 2. Allocation concealment (selection bias)
- 131 3. Blinding of participants and personnel (performance bias)
- 132 4. Blinding of outcome assessment (detection bias)

- 1
- 2 133 5. Incomplete outcome data (attrition bias)
- 3 134 6. Selective reporting (reporting bias)
- 4 135 7. Other bias (early stopping, baseline imbalance, blocked randomization with unblinded trials,
- 5 136 and imputation of intention-to-treat (ITT) analysis)
- 6

#### 7 137 **4.5 Statistical analysis**

9 138 The effect measure of dichotomous variables was reported for each outcome as the odds ratio (OR)  
10 139 with the related 95% confidence interval (8). All tests were 2-sided, and a p value <0.05 was considered  
11 140 statistically significant (except for heterogeneity, for which a p value <0.10 was considered  
12 141 significant). Weighted mean difference (WMD) was calculated for continuous variables. Values of OR,  
13 142 WMD, and weights are presented in forest plots. The random-effects model was used to pool effect  
14 143 sizes. Heterogeneity was tested both by performing Cochran's Q test and calculating  
15 144 Higgins' I<sup>2</sup> indicator (13, 14). The Q statistics were computed as the squared deviations from the  
16 145 pooled effect of the weighted sum of individual study effects, with the weights being used in the  
17 146 pooling method. P values were obtained by comparing test statistics with a chi-square with k-1 degrees  
18 147 of freedom (where k was the number of studies). The I<sup>2</sup> index corresponds to the percentage of the total  
19 148 variability across studies due to heterogeneity. A rough classification of its value based on the Cochrane  
20 149 Handbook for Systematic Reviews of Interventions is the following: low (0–40%), moderate (30–  
21 150 60%), substantial (50–90%), and considerable (75–100%) (11). Subgroup analysis was performed as  
22 151 described in the study protocol if a sufficient number of studies was available. Funnel plots were used  
23 152 to test the presence of publication bias. A Trial Sequential Analysis (TSA 0.9.5.10.) was also performed  
24 153 for the randomized controlled studies to quantify the statistical reliability and to estimate the optimal  
25 154 information size (OIS). This methodology combines an information size with the threshold of statistical  
26 155 significance. All the statistical analyses were performed using Comprehensive Meta-Analysis (version  
27 156 3, Biostat Inc., Englewood, NJ, USA) and StataIC (version 15.1).

#### 32 157 **4.6 Quality of evidence**

33 158 The GRADE approach was used by the two independent reviewers (KS and FM) to assess the quality  
34 159 of evidence for each outcome (15, 16). Disagreements were resolved by consensus.

### 37 160 **5 Results**

#### 39 161 **5.1 Search and selection**

40 162 The search process is shown in **Figure 1**. A total of 334 records were identified in the databases. After  
41 163 screening and assessment for eligibility, eleven full-text articles containing one minimized controlled  
42 164 trial and eleven RCTs were included for analysis. Eight studies provided data on patients with active  
43 165 UC, and three studies contained data on patients with UC in clinical remission.

#### 47 166 **5.2 Characteristics of the studies included**

48 167 The characteristics of the included studies are presented in **Table 1**. In the case of clinical remission  
49 168 induction, all the studies were RCTs, except for the one study with minimization (17). A total of 598  
50 169 participants (mean: 77, ranging from 19 to 168) were included in this meta-analysis: 350 patients  
51 170 received GMA, and 248 were in control groups. All the participants had active UC and were treated  
52 171 with Adacolumn® (7, 17-23). Four of these trials were sham-controlled. All the patients received  
53 172 standard of care added to the intervention/comparator and they did not receive any anti-TNF agent.

Both GMA and control were added to conventional treatment. In terms of main outcomes, the studies investigated the rate of clinical remission and clinical response. Investigators assessed the activity of UC with either the Mayo score or CAI. One study required steroid-free remission to regard cases as being in clinical remission.

In the case of clinical remission maintenance, all the studies were randomized controlled trials. A total of 71 participants (mean: 24, ranging from 13 to 37) were included in this meta-analysis: 36 patients received GMA, and 35 were in control groups. All the participants had ulcerative colitis in remission and were treated with Adacolumn® or Cellсорba®. One trial evaluated GMA vs sham control (24) and two trials assessed GMA compared to standard therapy alone (9, 25). Both GMA and sham control were added to conventional treatment. In terms of main outcome, the studies investigated the rate of clinical relapse.

Three studies also reported on the steroid-sparing effect of GMA (9, 17, 22).

### 5.3 Risk of bias assessment

A summary of risk of bias assessment is shown in **Supplementary Figure 1 and Supplementary Figure 2**. Three unblinded studies were at high risk of performance bias (19, 22, 25). Because of the nature of the intervention, four studies which lacked a description of the blinding process were interpreted as having a high risk of bias (18, 21, 23, 24). As regards assessment blinding, two unblinded studies were judged to be at high risk of bias (19, 25). Two studies were deemed as having a high risk of other bias; although they used ITT analysis, they considered subjects who left the study as a treatment failure that may lead to bias (7).

### 5.4 Efficacy and safety of GMA in clinical remission induction

Seven randomized and one minimized controlled trial evaluated clinical remission induction. GMA therapy was associated with a better clinical response rate compared to the control group (OR = 2.03, 95% CI = 1.36–3.01,  $p < 0.001$ ,  $I^2 = 8.4\%$ ) (**Supplementary Figure 3**). Subgroup analysis of studies with assessment at 12 weeks also showed benefit (OR = 1.67, 95% CI = 1.12–2.49,  $p = 0.012$ ,  $I^2 = 0.0\%$ ) (**Supplementary Figure 4**). Patients undergoing GMA therapy had a higher remission rate compared to standard therapy without GMA (OR = 1.93, 95% CI = 1.28–2.91,  $p = 0.002$ ,  $I^2 = 0.0\%$ ) (**Figure 2**). Sub-group analyses were performed based on activity indices and number of GMA cycles. No difference was found between the two groups in studies assessing UC with the Mayo score (OR = 1.34, 95% CI = 0.74–2.43,  $p = 0.334$ ,  $I^2 = 0.0\%$ ), but the remission induction was more successful in studies using CAI for assessment (OR = 2.70, 95% CI = 1.52–4.79,  $p = 0.001$ ,  $I^2 = 0.0\%$ ) (**Supplementary Figure 5**). A significant difference was found in studies using five cycles compared to the control (OR = 2.78, 95% CI = 1.17–6.60,  $p = 0.021$ ,  $I^2 = 0.0\%$ ) and more than five cycles compared to standard therapy alone (OR = 1.73, 95% CI = 1.08–2.77,  $p = 0.022$ ,  $I^2 = 0.0\%$ ). There was no statistically significant difference in the number of AEs ( $p = 0.135$ ) (**Supplementary Figure 6**). No statistically significant steroid-sparing effect was detected among patients with active UC ( $p = 0.080$ ). A list of reported AEs is presented in **Supplementary Table 1**.

### 5.5 Efficacy and safety of GMA in clinical remission maintenance

Three randomized clinical trials evaluated the clinical remission rate in remitting UC induced by GMA. Patients receiving GMA had a higher rate of clinical remission maintenance (OR = 8.34, 95% CI = 2.64–26.32,  $p < 0.001$ ,  $I^2 = 0.0\%$ ) (**Figure 3**). Due to lack of data, the rate of AEs could not be assessed in this population.

## 5.6 Trial Sequential Analysis

Based on a TSA, the cumulative Z curve crossed the trial sequential significance boundary as regards clinical remission induction and clinical remission maintenance (power=80.0%; alpha=5.0%) (**Supplementary Figure 7**). Moreover, clinical remission maintenance exceeded the required meta-analysis sample size, possibly suggesting that further clinical trials are not required. A TSA for AEs and steroid-sparing effects could not be carried out due to insufficient information size.

## 5.7 Quality of evidence

The GRADE analysis rated the quality of evidence for primary and secondary outcomes at a very low to low level. GRADE evidence profile is shown in **Supplementary Table 2**.

## 6 Discussion

The main goal of care is to achieve and maintain remission of UC. This condition is usually treated by a step-up approach, during which treatments are switched or additional treatment is administered to optimize current therapy. There are several therapeutic agents to slow down the clinical activity of UC. Corticosteroids, 5-aminosalicylates, immunosuppressive agents, and tumour necrosis alpha-inhibitors are commonly used, and new therapeutic targets, such as anti-adhesion molecules and anti-interleukins, are emerging. Despite these multiple therapeutic options, there is still a need to expand the scope of treatment methods due to possible development of intolerance or resistance to current treatments. After running out of treatment options, surgical therapy is frequently the last remaining option for patients. GMA is a novel non-pharmacologic treatment option for active and remitting UC, by which activated granulocytes and monocytes are removed from the circulation. These cells may contribute to the pathogenesis of UC.

Guidelines describing the role of GMA in UC are in agreement on the potential beneficial effect and favourable safety profile. They also agree that there is insufficient evidence in this field of practice (26, 27).

To our knowledge, the first report on the efficacy of GMA in UC was published in Japan in 2001 (28). This study found a considerably high remission rate with only five sessions of GMA in patients refractory to conventional drug therapy. Subsequent studies from the early 21<sup>st</sup> century had similar results (29-31). In 2008, Sands et al. failed to prove a significant difference in clinical remission rate between GMA and a placebo on a relatively large population (7). However, this study was not free of attrition bias; a high proportion of patients were lost to follow-up. Three systematic reviews and meta-analyses have been conducted in this field so far (32-34). All of them have agreed on the benefit of GMA in clinical remission induction, and they pointed out the necessity for more trials with a rigorous and clear design to further narrow the focus on specific patient groups. These studies used one to three databases for a systematic search and selection.

In our current meta-analysis, a broader literature search was carried out, and the role of GMA in clinical remission maintenance was assessed. Our work supported the hypothesis that GMA improves the rates of clinical response and clinical remission in patients with UC. It should be noted that response and remission rates defined by symptom scores should be cautiously interpreted because they also include subjective elements, such as overall physician judgement on disease activity. A few recent retrospective and prospective studies have suggested certain prognostic factors in the therapeutic response (35-37). It seems that younger patients respond better to GMA therapy, whereas gender and smoking status showed no difference in response to treatment (35). Yokoyama et al. found that shorter duration of UC and lower cumulative corticosteroid dose are associated with a higher efficacy rate

(36). In their study, patients who received GMA treatment immediately after relapse were the best responders. It would be advisable to conduct further research to identify subgroups of UC where patients benefit the most from GMA (38).

Based on our analysis, addition of GMA may be more effective for induction of remission in UC compared to conventional therapy alone (very low certainty). This result (OR = 1.93, 95% CI = 1.28–2.91,  $p=0.002$ ,  $I^2 = 0.0\%$ ) implies that patients receiving GMA have higher odds of achieving clinical remission by between 28 and 191%. To date, there is no uniformly accepted GMA regimen. There are RCTs to compare a ten-cycle and a five-cycle GMA regimen. Dignass et al. and Ricart et al. found similar remission rates between ten and five cycles (46% vs. 36%,  $p=0.479$ ; 35.7% vs 45.5%,  $p>0.05$ , respectively) (38, 39). The latter study also showed a steroid-sparing effect in the group receiving ten cycles of GMA. Sakuraba et al. found that an improved remission rate is associated with intensive GMA (54.0% vs 71.2%,  $p=0.029$  in five- and ten-cycle regimens, respectively) (40). In our meta-analysis, the number of GMA cycles varied among studies as well. We assessed the efficacy of GMA based on the two main regimens in previous trials. Both groups showed a benefit of adding GMA to the therapy compared to standard treatment alone.

Regarding the induction and maintenance of remission, our results relate to clinical remission. In 2015, based on insights from various clinical trials, a new consensus was made on appropriate evidence-based treatment targets (41). From then on, in addition to controlling symptoms, more objective markers came to the fore and endoscopic remission came to the spotlight. Only three of the articles analysed reported a comparison of endoscopic remission. Nakamura et al. found that the improvement in endoscopic score was significantly higher in the group receiving GMA as well (23). Another study showed that the Rachmilewitz's endoscopic index was significantly improved in patients treated with GMA compared to the control group (17). The third study reported similar endoscopic remission rate in the two groups (12% vs 11% in GMA and sham group, respectively;  $p=1.00$ ) (7). Data on objective inflammatory markers are also contradictory and insufficient (18, 20, 25). In light of this, there is a need for additional, high-quality RCTs that focus on current therapeutic targets.

We found no significant difference between the two groups as regards AEs (very low certainty). Further studies are called for to provide a higher level of evidence on this topic. They would be particularly important for specific subgroups where the safety profile is of paramount importance, such as in cytomegalovirus infection, adolescence, and pregnancy. Clinical trials should also target these populations because fewer therapeutic options are available for them and the safety profile of GMA seems favourable compared to other treatments.

As with any therapeutic option, cost-effectiveness should also be considered. The cost of GMA is much higher compared to regular medication, such as corticosteroids, but GMA could be cost-effective in the long term. The use of GMA may reduce the cost of medical services, hospitalization, and surgery in the long term. Nevertheless, GMA's safety profile is in sharp contrast to multiple severe AEs associated with conventional pharmacologics and biologics. According to recommendations, if UC flares up, treatment is usually escalated to biologics. As GMA and biologics are also likely to differ in terms of invasiveness, safety, and efficacy, the question arises: which one may be more beneficial? However, there is currently no evidence of this. In this regard, limited data are available from recent studies suggesting that GMA may be beneficial in patients who no longer respond to biologics (42–44).

To our knowledge, this is the first meta-analysis to assess the role of GMA in UC remission maintenance. Our study showed that the addition of GMA enhances the proportion of patients who can maintain their remission (low certainty). Fukunaga et al. and Emmrich et al. enrolled clinically active UC patients based on CAI (9, 24). After successful induction therapy with the inclusion of GMA,

1  
2 304 patients achieving clinical remission were allocated to groups with and without GMA treatment for  
3 305 remission maintenance. Maiden et al. enrolled UC patients with a high level of faecal calprotectin,  
4 306 which is considered as a risk factor of relapse (25). Their results showed that faecal calprotectin level  
5 307 significantly decreases following five treatment session. This study differs from the previous two in  
6 308 the fact that they enrolled an asymptomatic population regardless of how patients achieved remission.  
7 309 The two studies recruiting patients with active UC detected no statistically significant difference  
8 310 between study arms in time to first relapse; however, it must be noted that in one of these studies, all  
9 311 the patients became steroid-free in the GMA group (9). Maiden et al. found that time to first relapse  
10 312 was significantly higher in patients receiving GMA ( $99\pm 73$  days vs.  $161\pm 44$  days,  $p=0.0004$ ). Despite  
11 313 our very promising results, these findings are limited by the amount of available data. More randomized  
12 314 controlled trials are necessary in this area to strengthen our results. This study has some potential  
13 315 limitations. Allowed concomitant therapies have differed among included studies; therefore, our  
14 316 estimates may have been subject to bias, as reflected by the grade of evidence (**Supplementary Table**  
15 317 **2**). Moreover, our funnel plots showed symmetry by visual assessment, but publication bias still cannot  
16 318 be ruled out because of the low number of included studies. Side-effects and safety data were not  
17 319 uniformly reported in most of the publications under analysis, according to the International  
18 320 Conference on Harmonisation-Good Clinical Practice (ICH-GCP) guidelines (15). Therefore, our  
19 321 second main objective, the safety assessment of GMA, was only achieved to a limited extent.  
20 322 Furthermore, this result is strongly limited by the high heterogeneity of studies. The most likely source  
21 323 of this is the heterogeneous nature of concomitant treatment. All in all, GMA seems to be a reasonable  
22 324 therapeutic option, but finding its exact place to treat UC demands further research. A particularly  
23 325 promising area could be remission maintenance.

## 28 326 **6.1 Conclusion**

30 327 Implications for practice: The results support the hypothesis that patients with active UC have a  
31 328 better chance of clinical remission if GMA is administered as an adjunctive therapy. As regards the  
32 329 frequency of AEs, we found no statistically significant difference between the two groups. With  
33 330 regard to remission maintenance, GMA was identified as an effective alternative therapeutic option.

34 331 Implications for research: Further studies are required to select patients who may benefit the most  
35 332 from GMA therapy. Nevertheless, more randomized controlled studies are necessary to justify its  
36 333 role in remission induction. There is currently evidence available about induction and maintenance of  
37 334 clinical remission; however, the role of GMA concerning endoscopic and histological remission is  
38 335 currently unclear. If GMA is proven to be safe and effective, cost-effectiveness studies will also be  
39 336 worthwhile in the future.

## 44 337 **7 Data availability statement**

45 338 The data that support the findings of this study are available from the corresponding author, [A.H.],  
46 339 upon reasonable request.

## 49 340 **8 Patient and Public Involvement**

50 341 It was not appropriate or possible to involve patients or the public in the design, or conduct, or  
51 342 reporting, or dissemination plans of our research.

## 9 Author contributions

All authors meet the International Committee of Medical Journal Editors (ICMJE) criteria for authorship. All authors agree to be accountable for all aspects of the work in ensuring that questions related to the accuracy or integrity of any part of the work are appropriately investigated and resolved. All authors read and approved the final manuscript.

S.K.: drafting the manuscript, selection of studies, data extraction, risk of bias assessment; D.N.: statistical analysis, preparation of the standardized data collection sheet, drafting the manuscript; P.H.: substantial contribution in study design, critical revision of the content; M.F.: selection of studies, data extraction, risk of bias assessment, drafting the manuscript; Z.S.: participation in the design of the study and its coordination, critical revision of the manuscript; B.E.: provided revisions to the scientific content of the manuscript, substantial contribution in design of the work; B.T.: substantial contribution in study design, drafting the manuscript; P.J.H.: preparation of the standardized data collection sheet, stylistic and grammatical revision of the manuscript, substantial contribution in study design; P.S.: expert in the field of gastroenterology, substantial contribution in study design and interpretation of data, preparation of study protocol and the first draft of the manuscript; A.H.: expert in the field of haematology, substantial contribution in study design and interpretation of data, preparation of study protocol and the first draft of the manuscript

## 10 Funding

This research was not a company-initiated study. All costs were covered by the Economic Development and Innovation Operative Programme Grant (GINOP 2.3.2-15-2016-00048), the Grant of the Hungarian Science Foundation (FK 132834), and by Human Resources Development Operational Programme Grants (EFOP-3.6.2-16-2017-00006). Sponsors were not involved in the design, data collection, analysis, interpretation, or preparation of the manuscript.

## 11 Conflict of interest

Authors do not have any conflicts of interest to declare.

## 12 Compliance with Ethical Standards

This study was prepared in accordance with the Committee on Publication Ethics (COPE) guidelines to respect third parties rights such as copyright and/or moral rights. Ethical approval was not required to conduct this project as data is not individualized and primary data was not collected.

## 13 Abbreviations

AE, adverse events; clinical activity index, CAI; confidence interval, CI; granulocyte and monocyte apheresis, GMA; inflammatory bowel disease, IBD; OR, odds ratio; RCT, randomized controlled trial; TSA, trial sequential analysis; UC, ulcerative colitis; weighted mean difference, WMD.

## 14 References

1. Ordás I, Eckmann L, Talamini M, Baumgart DC, Sandborn WJ. Ulcerative colitis. *The Lancet*. 2012;380(9853):1606-19.
2. Ungaro R, Mehandru S, Allen PB, Peyrin-Biroulet L, Colombel J-F. Ulcerative colitis. *The Lancet*. 2017;389(10080):1756-70.

- 1  
2 381 3. Saniabadi AR, Tanaka T, Ohmori T, Sawada K, Yamamoto T, Hanai H. Treating  
3 382 inflammatory bowel disease by adsorptive leucocytapheresis: a desire to treat without drugs. *World J*  
4 383 *Gastroenterol.* 2014;20(29):9699-715.  
5
- 6 384 4. Matsumoto T, Fukunaga K, Kamikozuru K, Tozawa K, Yokoyama Y, Kusaka T, et al.  
7 385 Cytapheresis as a Non-Pharmacological Therapy for Inflammatory Bowel Disease. *Transfus Med*  
8 386 *Hemother.* 2008;35(1):18-23.  
9
- 10 387 5. Yamamoto T. The role of granulocyte and monocyte apheresis in inflammatory bowel  
11 388 disease. *J Crohns Colitis.* 2013;7(3):e114.
- 12  
13 389 6. Yamamoto T, Umegae S, Matsumoto K. Long-term clinical impact of early introduction of  
14 390 granulocyte and monocyte adsorptive apheresis in new onset, moderately active, extensive ulcerative  
15 391 colitis. *J Crohns Colitis.* 2012;6(7):750-5.
- 16  
17 392 7. Sands BE, Sandborn WJ, Feagan B, Lofberg R, Hibi T, Wang T, et al. A randomized, double-  
18 393 blind, sham-controlled study of granulocyte/monocyte apheresis for active ulcerative colitis.  
19 394 *Gastroenterology.* 2008;135(2):400-9.
- 20  
21 395 8. Bresci G, Parisi G, Mazzoni A, Scatena F, Capria A. Treatment of patients with acute  
22 396 ulcerative colitis: conventional corticosteroid therapy (MP) versus granulocytapheresis (GMA): a  
23 397 pilot study. *Dig Liver Dis.* 2007;39(5):430-4.
- 24  
25 398 9. Fukunaga K, Yokoyama Y, Kamokozuru K, Nagase K, Nakamura S, Miwa H, et al.  
26 399 Adsorptive granulocyte/monocyte apheresis for the maintenance of remission in patients with  
27 400 ulcerative colitis: a prospective randomized, double blind, sham-controlled clinical trial. *Gut Liver.*  
28 401 2012;6(4):427-33.
- 29  
30 402 10. Moher D, Liberati A, Tetzlaff J, Altman DG, Group P. Preferred reporting items for  
31 403 systematic reviews and meta-analyses: the PRISMA statement. *PLoS Med.* 2009;6(7):e1000097.
- 32  
33 404 11. Hoboken. *Cochrane Handbook for Systematic Reviews of Interventions*: Wiley; 2008.
- 34 405 12. Higgins JP, Altman DG, Gotzsche PC, Juni P, Moher D, Oxman AD, et al. The Cochrane  
35 406 Collaboration's tool for assessing risk of bias in randomised trials. *BMJ.* 2011;343:d5928.
- 36  
37 407 13. Cochran WG. The Combination of Estimates from Different Experiment. *Biometrics.*  
38 408 1954;10:101-29.
- 39  
40 409 14. Julian P T Higgins SGT, Jonathan J Deeks, Douglas G Altman. Measuring inconsistency in  
41 410 meta-analyses. *British Medical Journal.* 2003;327:557-60.
- 42  
43 411 15. Bhatt A. International Council for Harmonisation E6(R2) addendum: Challenges of  
44 412 implementation. *Perspectives in Clinical Research.* 2017;8(4):162-6.
- 45 413 16. Schünemann H, Brożek J, Guyatt G, A O. *GRADE handbook for grading quality of evidence*  
46 414 *and strength of recommendations: The GRADE Working Group, 2013; 2013.*
- 47  
48 415 17. Sawada K, Kusugami K, Suzuki Y, Bamba T, Munakata A, Hibi T, et al. Leukocytapheresis  
49 416 in ulcerative colitis: results of a multicenter double-blind prospective case-control study with sham  
50 417 apheresis as placebo treatment. *Am J Gastroenterol.* 2005;100(6):1362-9.
- 51  
52 418 18. Bresci G, Parisi G, Mazzoni A, Scatena F, Capria A. Granulocytapheresis versus  
53 419 methylprednisolone in patients with acute ulcerative colitis: 12-month follow up. *J Gastroenterol*  
54 420 *Hepatol.* 2008;23(11):1678-82.  
55  
56  
57  
58  
59



- 1  
2 421 19. Domenech E, Panes J, Hinojosa J, Annese V, Magro F, Sturniolo GC, et al. Addition of  
3 422 Granulocyte/Monocyte Apheresis to Oral Prednisone for Steroid-dependent Ulcerative Colitis: A  
4 423 Randomized Multicentre Clinical Trial. *J Crohns Colitis*. 2018;12(6):687-94.  
5  
6 424 20. Eberhardson M, Karlen P, Linton L, Jones P, Lindberg A, Kostalla MJ, et al. Randomised,  
7 425 Double-blind, Placebo-controlled Trial of CCR9-targeted Leukapheresis Treatment of Ulcerative  
8 426 Colitis Patients. *J Crohns Colitis*. 2017;11(5):534-42.  
9  
10 427 21. Hanai H, Iida T, Takeuchi K, Watanabe F, Maruyama Y, Kageoka M, et al. Intensive  
11 428 granulocyte and monocyte adsorption versus intravenous prednisolone in patients with severe  
12 429 ulcerative colitis: an unblinded randomised multi-centre controlled study. *Dig Liver Dis*.  
13 430 2008;40(6):433-40.  
14  
15 431 22. Hanai H, Watanabe F, Yamada M, Sato Y, Takeuchi K, Iida T, et al. Adsorptive granulocyte  
16 432 and monocyte apheresis versus prednisolone in patients with corticosteroid-dependent moderately  
17 433 severe ulcerative colitis. *Digestion*. 2004;70(1):36-44.  
18  
19 434 23. Nakamura T, Kawagoe Y, Matsuda T, Ueda A, Ueda Y, Takahashi Y, et al. Effect of  
20 435 granulocyte and monocyte adsorption apheresis on urinary albumin excretion and plasma endothelin-  
21 436 1 concentration in patients with active ulcerative colitis. *Blood Purif*. 2004;22(6):499-504.  
22  
23 437 24. Emmrich J, Petermann S, Nowak D, Beutner I, Brock P, Klingel R, et al. Leukocytapheresis  
24 438 (LCAP) in the management of chronic active ulcerative colitis--results of a randomized pilot trial.  
25 439 *Dig Dis Sci*. 2007;52(9):2044-53.  
26  
27 440 25. Maiden L, Takeuchi K, Baur R, Bjarnason I, O'Donohue J, Forgacs I, et al. Selective white  
28 441 cell apheresis reduces relapse rates in patients with IBD at significant risk of clinical relapse.  
29 442 *Inflamm Bowel Dis*. 2008;14(10):1413-8.  
30  
31 443 26. Leukapheresis for inflammatory bowel disease: Interventional procedures guidance 2005  
32 444 [Available from: <https://www.nice.org.uk/guidance/ipg126>.  
33  
34 445 27. Matsuoka K, Kobayashi T, Ueno F, Matsui T, Hirai F, Inoue N, et al. Evidence-based clinical  
35 446 practice guidelines for inflammatory bowel disease. *J Gastroenterol*. 2018;53(3):305-53.  
36  
37 447 28. Shimoyama T, Kimura K, Hiwatashi N, Matsueda K, Munakata A, Asakura H, et al. Safety  
38 448 and Efficacy of Granulocyte and Monocyte Adsorption Apheresis in Patients With Active Ulcerative  
39 449 Colitis: A Multicenter Study. *Journal of Clinical Apheresis*. 2001;16:1-9.  
40  
41 450 29. Kanke K, Nakano M, Hiraishi H, Terano A. Clinical evaluation of granulocyte/monocyte  
42 451 apheresis therapy for active ulcerative colitis. *Dig Liver Dis*. 2004;36(12):811-7.  
43  
44 452 30. Kim HJ, Kim JS, Han DS, Yang SK, Hahm KB, Lee WI, et al. [Granulocyte and monocyte  
45 453 adsorption apheresis in Korean conventional treatment-refractory patients with active ulcerative  
46 454 colitis: a prospective open-label multicenter study]. *The Korean journal of gastroenterology = Taehan*  
47 455 *Sohwagi Hakhoe chi*. 2005;45(1):34-44.  
48  
49 456 31. Shimoyama T, Sawada K, Hiwatashi N, Sawada T, Matsueda K, Munakata A, et al. Safety  
50 457 and efficacy of granulocyte and monocyte adsorption apheresis in patients with active ulcerative  
51 458 colitis: a multicenter study. *J Clin Apher*. 2001;16(1):1-9.  
52  
53 459 32. Habermalz B, Sauerland S. Clinical effectiveness of selective granulocyte, monocyte  
54 460 adsorptive apheresis with the Adacolumn device in ulcerative colitis. *Dig Dis Sci*. 2010;55(5):1421-  
55 461 8.  
56  
57 462 33. Thanaraj S, Hamlin PJ, Ford AC. Systematic review: granulocyte/monocyte adsorptive  
58 463 apheresis for ulcerative colitis. *Aliment Pharmacol Ther*. 2010;32(11-12):1297-306.  
59  
60

- 1  
2 464 34. Yoshino T, Nakase H, Minami N, Yamada S, Matsuura M, Yazumi S, et al. Efficacy and  
3 465 safety of granulocyte and monocyte adsorption apheresis for ulcerative colitis: a meta-analysis. *Dig*  
4 466 *Liver Dis.* 2014;46(3):219-26.
- 5  
6 467 35. Imperiali G, Amato A, Terpin MM, Beverina I, Bortoli A, Devani M, et al. Granulocyte-  
7 468 Monocyte Apheresis in Steroid-Dependent, Azathioprine-Intolerant/Resistant Moderate Ulcerative  
8 469 Colitis: A Prospective Multicenter Study. *Gastroenterol Res Pract.* 2017;2017:9728324.
- 9  
10 470 36. Yokoyama Y, Kawai M, Fukunaga K, Kamikozuru K, Nagase K, Nogami K, et al. Looking  
11 471 for predictive factors of clinical response to adsorptive granulocyte and monocyte apheresis in  
12 472 patients with ulcerative colitis: markers of response to GMA. *BMC Gastroenterology.* 2013;13(27).
- 13  
14 473 37. Tanaka T, Sugiyama S, Goishi H, Kajihara T, Akagi M, Miura T. Treatment of children and  
15 474 adolescents with ulcerative colitis by adsorptive depletion of myeloid lineage leucocytes as  
16 475 monotherapy or in combination with low dose prednisolone after failure of first-line medications.  
17 476 *BMC Gastroenterology.* 2013;13(130).
- 18  
19 477 38. Dignass AU, Eriksson A, Kilander A, Pukitis A, Rhodes JM, Vavricka S. Clinical trial: five  
20 478 or ten cycles of granulocyte-monocyte apheresis show equivalent efficacy and safety in ulcerative  
21 479 colitis. *Aliment Pharmacol Ther.* 2010;31(12):1286-95.
- 22  
23 480 39. Ricart E, Esteve M, Andreu M, Casellas F, Monfort D, Sans M, et al. Evaluation of 5 versus  
24 481 10 granulocyteapheresis sessions in steroid-dependent ulcerative colitis: A pilot, prospective,  
25 482 multicenter, randomized study. *World Journal of Gastroenterology.* 2007;13(15):2193-7.
- 26  
27 483 40. Sakuraba A, Motoya S, Watanabe K, Nishishita M, Kanke K, Matsui T, et al. An open-label  
28 484 prospective randomized multicenter study shows very rapid remission of ulcerative colitis by  
29 485 intensive granulocyte and monocyte adsorptive apheresis as compared with routine weekly treatment.  
30 486 *Am J Gastroenterol.* 2009;104(12):2990-5.
- 31  
32 487 41. Peyrin-Biroulet L, Sandborn W, Sands BE, Reinisch W, Bemelman W, Bryant RV, et al.  
33 488 Selecting Therapeutic Targets in Inflammatory Bowel Disease (STRIDE): Determining Therapeutic  
34 489 Goals for Treat-to-Target. *Am J Gastroenterol.* 2015;110(9):1324-38.
- 35  
36 490 42. Yokoyama Y, Sawada K, Aoyama N, Yoshimura N, Sako M, Hirai F, et al. Efficacy of  
37 491 Granulocyte and Monocyte Adsorptive Apheresis in Patients With Inflammatory Bowel Disease  
38 492 Showing Lost Response to Infliximab. *J Crohns Colitis.* 2020;14(9):1264-73.
- 39  
40 493 43. Nakamura M, Yamamura T, Maeda K, Sawada T, Mizutani Y, Ishikawa E, et al. Refractory  
41 494 Ulcerative Colitis Improved by Scheduled Combination Therapy of Vedolizumab and Granulocyte  
42 495 and Monocyte Adsorptive Apheresis. *Internal medicine (Tokyo, Japan).* 2020;59(23):3009-14.
- 43  
44 496 44. Rodríguez-Lago I, Sempere L, Gutiérrez A, Núñez A, Leo Carnerero E, Hinojosa E, et al.  
45 497 Granulocyte-monocyte apheresis: an alternative combination therapy after loss of response to anti-  
46 498 TNF agents in ulcerative colitis. *Scandinavian journal of gastroenterology.* 2019;54(4):459-64.

## 48 499 15 Figures and tables

49  
50 500 **Figure 1:** PRISMA flow chart representing the process of the study search and selection

51  
52 501 **Figure 2:** Forest plot of studies comparing clinical remission induction between patients with and  
53 502 without GMA as adjunctive therapy. Black diamonds represent the individual studies effect and  
54 503 vertical lines show the corresponding 95% confidence intervals. Size of the grey squares reflect on  
55 504 the weight of a particular study. The blue diamond the overall or summary effect. The outer edges of  
56 505 the diamonds represent the CIs.

**Figure 3:** Forest plot of studies comparing clinical remission maintenance between patients with and without GMA as adjunctive therapy. Black diamonds represent the individual studies effect and vertical lines show the corresponding 95% confidence intervals. Size of the grey squares reflect on the weight of a particular study. The blue diamond the overall or summary effect. The outer edges of the diamonds represent the CIs.

**Table 1:** Characteristics of included studies

**Supplementary Figure 1:** Risk of bias assessment on study level in studies comparing patients with and without GMA as an adjunctive therapy

**Supplementary Figure 2:** Risk of bias assessment across studies comparing patients with and without GMA as an adjunctive therapy

**Supplementary Figure 3:** Forest plot of studies comparing clinical remission induction or clinical improvement between patients with and without GMA as adjunctive therapy. Black diamonds represent the individual studies effect and vertical lines show the corresponding 95% confidence intervals (8). Size of the grey squares reflect on the weight of a particular study. The blue diamond the overall or summary effect. The outer edges of the diamonds represent the CIs.

**Supplementary Figure 4:** Subgroup analysis of studies comparing clinical remission induction or clinical improvement after 12 weeks between patients with and without GMA as adjunctive therapy. Black diamonds represent the individual studies effect and vertical lines show the corresponding 95% confidence intervals (8). Size of the grey squares reflect on the weight of a particular study. The blue diamond the overall or summary effect. The outer edges of the diamonds represent the CIs.

**Supplementary Figure 5:** Subgroup analysis based on criteria of remission in studies comparing clinical remission induction between patients with and without GMA as adjunctive therapy. Black diamonds represent the individual studies effect and vertical lines show the corresponding 95% confidence intervals. Size of the grey squares reflect on the weight of a particular study. The blue diamond the overall or summary effect. The outer edges of the diamonds represent the CIs.

**Supplementary Figure 6:** Forest plot of studies comparing frequency of adverse events between patients with and without GMA as adjunctive therapy. Black diamonds represent the individual studies effect and vertical lines show the corresponding 95% confidence intervals. Size of the grey squares reflect on the weight of a particular study. The blue diamond the overall or summary effect. The outer edges of the diamonds represent the CIs.

**Supplementary Figure 7:** Results of Trial Sequential Analysis. A: clinical remission induction, B: clinical remission maintenance, C: Clinical remission induction based on remission criteria, D: Clinical remission induction or clinical improvement

**Supplementary Table 1:** List of reported adverse events.

**Supplementary Table 2:** Certainty of evidence by GRADE approach

541 **Table 1: Characteristics of included studies**

542 \* All patients received standard of care added to investigator/comparator. 1: one patient was excluded from analysis because of  
 543 protocol deviations; 2: one patient was excluded from analysis because of protocol deviations; 3: one patient was excluded due to  
 544 failure to return blood from the column; 4: minimization may be implemented without a random element, and this is considered to  
 545 be equivalent to being random. Abbreviations: GMA=granulocyte/monocyte apheresis; n= number; CAI=Clinical Activity Index;  
 546 EI=Endoscopic Index; 5-ASA=5-aminosalicylic acid; AZA=azathioprine; 6-MP=6-mercaptopurine;

| Clinical remission induction         |                              |                |                                         |                             |    |                              |    |                    |                            |                                                      |                                                                                    |
|--------------------------------------|------------------------------|----------------|-----------------------------------------|-----------------------------|----|------------------------------|----|--------------------|----------------------------|------------------------------------------------------|------------------------------------------------------------------------------------|
| Study Name and Setting               | N <sup>o</sup> of cycles (n) | Randomization* | N <sup>o</sup> of patients analyzed (n) | Patients achieving response |    | Patients achieving remission |    | Time of assessment | Outcome criteria           |                                                      | Concomitant medication                                                             |
|                                      |                              |                |                                         | %                           | n  | %                            | n  |                    | Remission                  | Response                                             |                                                                                    |
| Brescia 2008 single center study     | 5                            | GMA            | 40                                      | 92.5                        | 37 | 72.5                         | 29 | 5 weeks            | CAI<6; EI<4                | CAI<6; EI>4                                          | oral 5-ASA                                                                         |
|                                      |                              | steroid        | 40                                      | 65.0                        | 26 | 50.0                         | 20 |                    |                            |                                                      |                                                                                    |
| Doménech 2018 multi-center study     | 7                            | GMA+steroid    | 62 <sup>1</sup>                         | 58.1                        | 36 | 19.4                         | 12 | 12 weeks           | Mayo ≤2 and no steroid use | Mayo score decrease ≥3 or at least 30% from baseline | stable dose AZA and steroid were allowed if started before randomization           |
|                                      |                              | steroid        | 61 <sup>2</sup>                         | 49.2                        | 30 | 18.0                         | 11 |                    |                            |                                                      |                                                                                    |
| Eberhardson 2017 single center study | 5                            | GMA            | 14                                      | 57.1                        | 8  | 35.7                         | 5  | 12 days            | Mayo score ≤3              | Mayo score decrease ≥3 or at least 30% from baseline | stable dose of steroid; 5-ASA and/or thiopurines were allowed                      |
|                                      |                              | sham           | 8 <sup>3</sup>                          | 37.5                        | 3  | 12.5                         | 1  |                    |                            |                                                      |                                                                                    |
| Hanai 2004 single center study       | 7                            | GMA            | 46                                      | 93.5                        | 43 | 82.6                         | 38 | 12 weeks           | CAI≤4                      | CAI had fallen, but still 4<                         | steroids and/or 5-ASA                                                              |
|                                      |                              | steroid        | 23                                      | 78.3                        | 18 | 65.2                         | 15 |                    |                            |                                                      |                                                                                    |
| Hanai 2008 multi-center study        | 11                           | GMA            | 35                                      | 80.0                        | 28 | 74.3                         | 26 | 12 weeks           | CAI≤4                      | CAI decreased by ≥5 points, but remained ≥5          | all patients were on salicylates and the majority were on low dose steroid as well |
|                                      |                              | steroid        | 35                                      | 62.9                        | 22 | 48.6                         | 17 |                    |                            |                                                      |                                                                                    |

|                                                |    |        |     |      |     |      |    |          |                                            |                                                    |                                                                  |
|------------------------------------------------|----|--------|-----|------|-----|------|----|----------|--------------------------------------------|----------------------------------------------------|------------------------------------------------------------------|
| Nakamura 2004<br>single center study           | 5  | GMA    | 10  | N/A  | N/A | 80.0 | 8  | 6 weeks  | based on CAI, but not specified            | all patients received steroid; 5-ASA was unchanged |                                                                  |
|                                                |    | no GMA | 10  | N/A  | N/A | 20.0 | 2  |          |                                            |                                                    |                                                                  |
| Sands 2008 A study<br>multi-center study       | 10 | GMA    | 31  | 67.7 | 21  | 16.1 | 5  | 12 weeks | Mayo score $\leq 2$ ; 0-1 endoscopic score | Mayo score decrease $\geq 3$                       | one or more of the following: 5-ASA agents, steroid, 6-MP or AZA |
|                                                |    | sham   | 16  | 62.5 | 10  | 18.8 | 3  |          |                                            |                                                    |                                                                  |
| Sands 2008 B study<br>multi-center study       | 10 | GMA    | 112 | 60.7 | 68  | 17.0 | 19 | 12 weeks | Mayo score $\leq 2$ ; 0-1 endoscopic score | Mayo score decrease $\geq 3$                       | one or more of the following: 5-ASA, steroid, 6-MP or AZA        |
|                                                |    | sham   | 56  | 50.0 | 28  | 10.7 | 6  |          |                                            |                                                    |                                                                  |
| Sawada 2005 <sup>4</sup><br>multi-center study | 7  | GMA    | 10  | 80.0 | 8   | 20.0 | 2  | 10 weeks | CAI=0                                      | CAI improved $>3$                                  | except for steroid, other medications remained unchanged         |
|                                                |    | sham   | 9   | 33.3 | 3   | 11.1 | 1  |          |                                            |                                                    |                                                                  |

**Clinical remission maintenance**

| Study Name                           | Number of cycles (n) | Randomization | Number of patients analyzed (n) | Number of patients in clinical remission at the end of the study |    | Close-out examination | Outcome criteria for remission | Concomitant medication                                                                    |
|--------------------------------------|----------------------|---------------|---------------------------------|------------------------------------------------------------------|----|-----------------------|--------------------------------|-------------------------------------------------------------------------------------------|
|                                      |                      |               |                                 | %                                                                | n  |                       |                                |                                                                                           |
| Emmrich 2006<br>single center study  | 5                    | GMA           | 8                               | 62.5                                                             | 5  | 6 months              | CAI $\leq 4$                   | all patients were on steroid; 5-ASA was allowed; AZA given at baseline remained unchanged |
|                                      |                      | no GMA        | 5                               | 20.0                                                             | 1  |                       |                                |                                                                                           |
| Fukunaga 2012<br>single center study | 12                   | GMA           | 10                              | 40.0                                                             | 4  | 12 months             | CAI $\leq 4$                   | stable dose of AZA and steroids were allowed if started before randomization              |
|                                      |                      | sham          | 11                              | 9.1                                                              | 1  |                       |                                |                                                                                           |
| Maiden 2008<br>single center study   | 5                    | GMA           | 18                              | 77.8                                                             | 14 | 6 months              | CAI $\leq 6$                   | only 5-ASA or oral steroid                                                                |
|                                      |                      | no GMA        | 19                              | 26.3                                                             | 5  |                       |                                |                                                                                           |

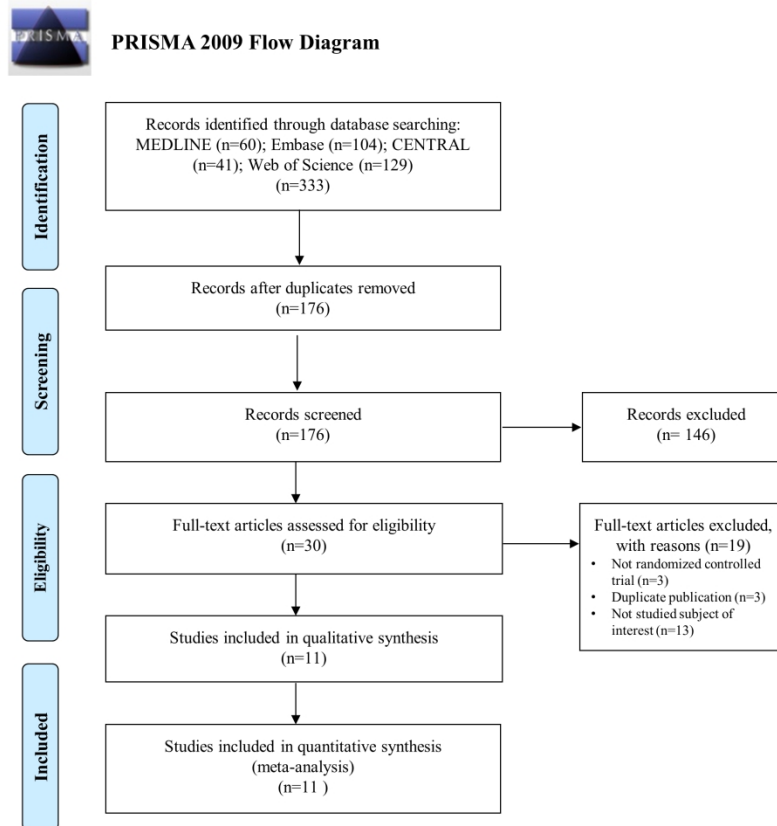

From: Moher D, Liberati A, Tetzlaff J, Altman DG, The PRISMA Group (2009). Preferred Reporting Items for Systematic Reviews and Meta-Analyses: The PRISMA Statement. PLoS Med 6(7): e1000097. doi:10.1371/journal.pmed1000097

For more information, visit [www.prisma-statement.org](http://www.prisma-statement.org).

**Figure 1:** PRISMA flow chart representing the process of the study search and selection

190x275mm (300 x 300 DPI)

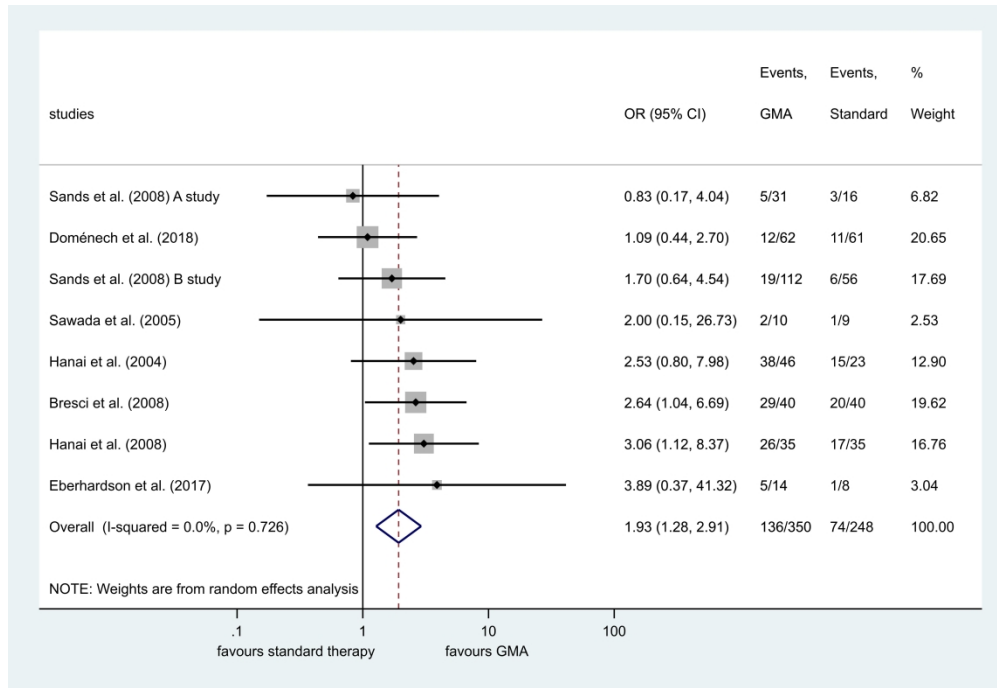

**Figure 2:** Forest plot of studies comparing clinical remission induction between patients with and without GMA as adjunctive therapy. Black diamonds represent the individual studies effect and vertical lines show the corresponding 95% confidence intervals (CI). Size of the grey squares reflect on the weight of a particular study. The blue diamond the overall or summary effect. The outer edges of the diamonds represent the CIs.

272x186mm (600 x 600 DPI)

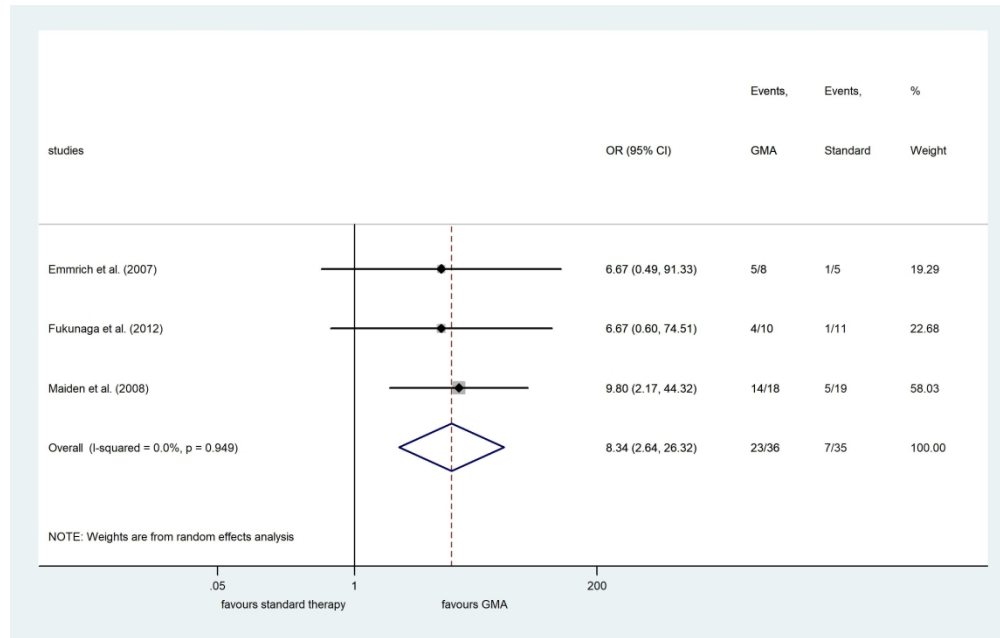

**Figure 3:** Forest plot of studies comparing clinical remission maintenance between patients with and without GMA as adjunctive therapy. Black diamonds represent the individual studies effect and vertical lines show the corresponding 95% confidence intervals (CI). Size of the grey squares reflect on the weight of a particular study. The blue diamond the overall or summary effect. The outer edges of the diamonds represent the CIs.

137x87mm (600 x 600 DPI)



## Supplementary material

### Granulocyte and monocyte apheresis as an adjunctive therapy to induce and maintain clinical remission in ulcerative colitis: A systematic review and meta-analysis

Szabolcs Kiss<sup>1,2</sup>, Dávid Németh<sup>2</sup>, Péter Hegyi<sup>2,3</sup>, Mária Földi<sup>1,2</sup>, Zsolt Szakács<sup>2,3</sup>, Bálint Erőss<sup>2,3</sup>, Benedek Tinusz<sup>4</sup>, Péter Jenő Hegyi<sup>2,5</sup>, Patrícia Sarlós<sup>2,5</sup>, Hussain Alizadeh<sup>1,6\*</sup>

<sup>1</sup>Doctoral School of Clinical Medicine, University of Szeged, Szeged, Hungary

<sup>2</sup>Institute for Translational Medicine, Medical School, University of Pécs, Pécs, Hungary

<sup>3</sup>János Szentágothai Research Centre, University of Pécs, Pécs, Hungary

<sup>4</sup>First Department of Medicine, Medical School, University of Pécs, Pécs, Hungary

<sup>5</sup>Division of Gastroenterology, First Department of Medicine, Medical School, University of Pécs, Pécs, Hungary

<sup>6</sup>Division of Haematology, First Department of Medicine, Medical School, University of Pécs, Pécs, Hungary

**\* Correspondence:**

Alizadeh Hussain M.D., Ph.D., Address: First Department of Medicine, University of Pécs Medical School, H-7624 Pécs, Ifjúság útja 13., Hungary; Tel: +(36-30) 643-6099

E-mail: alizadeh.hussain@pte.hu

Keywords: Inflammatory bowel disease

## Search strategy for MEDLINE database

Date of search: 5<sup>th</sup> March, 2019

Full query: (gma OR apheresis OR adsorption OR "cell separation" OR leukapher\* OR leukopher\* OR leukocytapher\* OR leukocytopher\* OR lymphapher\* OR lymphopher\* OR lymphocytopher\* OR lymphocytapher\*) AND ("inflammatory bowel disease" OR "ulcerative colitis") AND (random\*)

No filters or restrictions were applied.

| Search | Query                                                                                                                                                                                   | Automatic explosion                                                                                                                                                                                                                                                                                                                                                                                                                                                                                                                                                                                                                                                                                                                                                                                                                                             |
|--------|-----------------------------------------------------------------------------------------------------------------------------------------------------------------------------------------|-----------------------------------------------------------------------------------------------------------------------------------------------------------------------------------------------------------------------------------------------------------------------------------------------------------------------------------------------------------------------------------------------------------------------------------------------------------------------------------------------------------------------------------------------------------------------------------------------------------------------------------------------------------------------------------------------------------------------------------------------------------------------------------------------------------------------------------------------------------------|
| #1     | gma OR apheresis OR adsorption OR "cell separation" OR leukapher* OR leukopher* OR leukocytapher* OR leukocytopher* OR lymphapher* OR lymphopher* OR lymphocytopher* OR lymphocytapher* | ("gma"[All Fields] OR ("blood component removal"[MeSH Terms] OR ("blood"[All Fields] AND "component"[All Fields] AND "removal"[All Fields]) OR "blood component removal"[All Fields] OR "apheresis"[All Fields]) OR ("adsorption"[MeSH Terms] OR "adsorption"[All Fields] OR "adsorptions"[All Fields] OR "adsorptive"[All Fields] OR "adsorptively"[All Fields] OR "adsorptives"[All Fields] OR "adsorptivities"[All Fields] OR "adsorptivity"[All Fields]) OR "cell separation"[All Fields] OR "leukapher*"[All Fields] OR "leukopher*"[All Fields] OR "leukocytapher*"[All Fields] OR "leukocytopher*"[All Fields] OR "lymphapher*"[All Fields] OR "lymphopher*"[All Fields] OR "lymphocytopher*"[All Fields] OR "lymphocytapher*"[All Fields])                                                                                                              |
| #2     | "inflammatory bowel disease" OR "ulcerative colitis"                                                                                                                                    | "inflammatory bowel disease"[All Fields] OR "ulcerative colitis"[All Fields]                                                                                                                                                                                                                                                                                                                                                                                                                                                                                                                                                                                                                                                                                                                                                                                    |
| #3     | random*                                                                                                                                                                                 | "random*"[All Fields]                                                                                                                                                                                                                                                                                                                                                                                                                                                                                                                                                                                                                                                                                                                                                                                                                                           |
| #4     | #1 AND #2                                                                                                                                                                               | ("gma"[All Fields] OR ("blood component removal"[MeSH Terms] OR ("blood"[All Fields] AND "component"[All Fields] AND "removal"[All Fields]) OR "blood component removal"[All Fields] OR "apheresis"[All Fields]) OR ("adsorption"[MeSH Terms] OR "adsorption"[All Fields] OR "adsorptions"[All Fields] OR "adsorptive"[All Fields] OR "adsorptively"[All Fields] OR "adsorptives"[All Fields] OR "adsorptivities"[All Fields] OR "adsorptivity"[All Fields]) OR "cell separation"[All Fields] OR "leukapher*"[All Fields] OR "leukopher*"[All Fields] OR "leukocytapher*"[All Fields] OR "leukocytopher*"[All Fields] OR "lymphapher*"[All Fields] OR "lymphopher*"[All Fields] OR "lymphocytopher*"[All Fields] OR "lymphocytapher*"[All Fields]) AND ("inflammatory bowel disease"[All Fields] OR "ulcerative colitis"[All Fields])                           |
| #5     | #3 AND #4                                                                                                                                                                               | ("gma"[All Fields] OR ("blood component removal"[MeSH Terms] OR ("blood"[All Fields] AND "component"[All Fields] AND "removal"[All Fields]) OR "blood component removal"[All Fields] OR "apheresis"[All Fields]) OR ("adsorption"[MeSH Terms] OR "adsorption"[All Fields] OR "adsorptions"[All Fields] OR "adsorptive"[All Fields] OR "adsorptively"[All Fields] OR "adsorptives"[All Fields] OR "adsorptivities"[All Fields] OR "adsorptivity"[All Fields]) OR "cell separation"[All Fields] OR "leukapher*"[All Fields] OR "leukopher*"[All Fields] OR "leukocytapher*"[All Fields] OR "leukocytopher*"[All Fields] OR "lymphapher*"[All Fields] OR "lymphopher*"[All Fields] OR "lymphocytopher*"[All Fields] OR "lymphocytapher*"[All Fields]) AND ("inflammatory bowel disease"[All Fields] OR "ulcerative colitis"[All Fields]) AND "random*"[All Fields] |

1  
2  
3  
4  
5  
6  
7  
8  
9  
10  
11  
12  
13  
14  
15  
16  
17  
18  
19  
20  
21  
22  
23  
24  
25  
26  
27  
28  
29  
30  
31  
32  
33  
34  
35  
36  
37  
38  
39  
40  
41  
42  
43  
44  
45  
46  
47  
48  
49  
50  
51  
52  
53  
54  
55  
56  
57  
58  
59  
60

|                    | Random sequence generation (selection bias) | Allocation concealment (selection bias) | Blinding of participants and personnel (performance bias) | Blinding of outcome assessment (detection bias) | Incomplete outcome data (attrition bias) | Selective reporting (reporting bias) | Other bias |
|--------------------|---------------------------------------------|-----------------------------------------|-----------------------------------------------------------|-------------------------------------------------|------------------------------------------|--------------------------------------|------------|
| Bresci 2008        | ?                                           | ?                                       | -                                                         | ?                                               | +                                        | +                                    | +          |
| Doménech 2018      | +                                           | +                                       | -                                                         | -                                               | +                                        | +                                    | +          |
| Eberhardson 2016   | ?                                           | ?                                       | ?                                                         | +                                               | +                                        | ?                                    | +          |
| Emmrich 2006       | ?                                           | ?                                       | -                                                         | ?                                               | +                                        | ?                                    | +          |
| Fukunaga 2012      | +                                           | +                                       | +                                                         | ?                                               | +                                        | +                                    | +          |
| Hanai 2004         | ?                                           | ?                                       | -                                                         | +                                               | +                                        | +                                    | +          |
| Hanai 2008         | ?                                           | ?                                       | -                                                         | +                                               | +                                        | +                                    | +          |
| Maiden 2012        | +                                           | ?                                       | -                                                         | -                                               | +                                        | ?                                    | +          |
| Nakamura 2004      | ?                                           | ?                                       | -                                                         | ?                                               | +                                        | +                                    | +          |
| Sands 2008 A study | +                                           | +                                       | +                                                         | +                                               | +                                        | +                                    | -          |
| Sands 2008 B study | +                                           | +                                       | +                                                         | +                                               | +                                        | +                                    | -          |
| Sawada 2005        | ?                                           | +                                       | +                                                         | +                                               | +                                        | +                                    | +          |

# Supplementary Figure 2

1  
2  
3  
4  
5  
6  
7  
8  
9  
10  
11  
12  
13  
14  
15  
16  
17  
18  
19  
20  
21

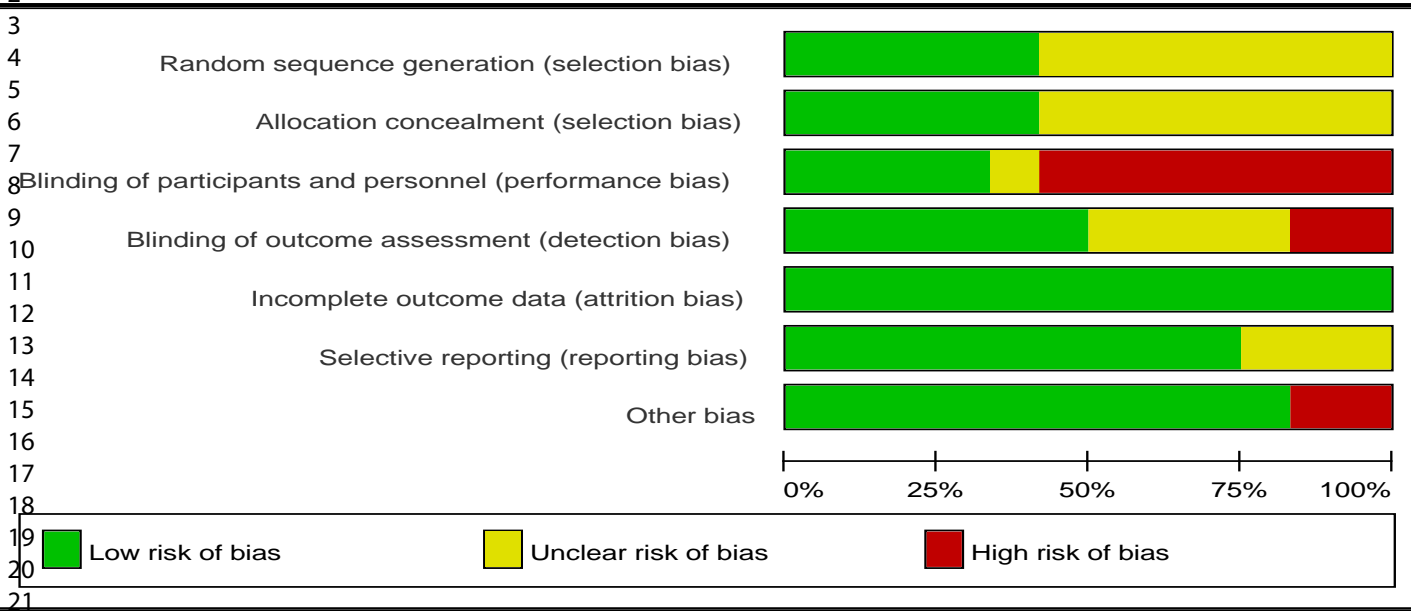

22  
23  
24  
25  
26  
27  
28  
29  
30  
31  
32  
33  
34  
35  
36  
37  
38  
39  
40  
41  
42  
43  
44  
45  
46  
47  
48  
49  
50  
51  
52  
53  
54  
55  
56  
57  
58  
59  
60

**Detailed risk of bias assessment**

| <b>Bresci et al. 2008</b>                                 | Authors judgement | Support for judgement                                                                                                                  |
|-----------------------------------------------------------|-------------------|----------------------------------------------------------------------------------------------------------------------------------------|
| Random sequence generation (selection bias)               | Unclear risk      | Stated as randomized study, but method was not specified in the manuscript                                                             |
| Allocation concealment (selection bias)                   | Unclear risk      | Not described in the manuscript.                                                                                                       |
| Blinding of participants and personnel (performance bias) | High risk         | Not described in the manuscript, but probably not done, because the trial compared an interventional procedure to drug treatment only. |
| Blinding of outcome assessment (detection bias)           | Unclear risk      | Not described in the manuscript.                                                                                                       |
| Incomplete outcome data (attrition bias)                  | Low risk          | Number of patients at baseline and at the end of the follow-up are the same.                                                           |
| Selective reporting (reporting bias)                      | Low risk          | Both significant and non-significant data have been reported. Adverse events were adequately reported.                                 |
| Other bias                                                | Low risk          | The study appears to be free of other sources of bias.                                                                                 |

| <b>Doménech et al. 2018</b>                               | Authors judgement | Support for judgement                                                                                                     |
|-----------------------------------------------------------|-------------------|---------------------------------------------------------------------------------------------------------------------------|
| Random sequence generation (selection bias)               | Low risk          | Quote: "...randomization codes were centrally generated using a computer procedure..."<br>Blocked randomization was used. |
| Allocation concealment (selection bias)                   | Low risk          | Quote: "...randomization codes were centrally generated using a computer procedure..."                                    |
| Blinding of participants and personnel (performance bias) | High risk.        | Open-label.                                                                                                               |
| Blinding of outcome assessment (detection bias)           | High risk         | Quote: "...the endoscopist was not necessarily blinded..."                                                                |
| Incomplete outcome data (attrition bias)                  | Low risk          | Intention-to-treat method was used. 123/125 patients completed the study.                                                 |
| Selective reporting (reporting bias)                      | Low risk          | Both significant and non-significant results have been reported. Adequate                                                 |

|            |          |                                                        |
|------------|----------|--------------------------------------------------------|
|            |          | description of adverse events.                         |
| Other bias | Low risk | The study appears to be free of other sources of bias. |

| <b>Eberhardson et al. 2017</b>                            | Authors judgement | Support for judgement                                                                                                                                                                                                                                                                                                 |
|-----------------------------------------------------------|-------------------|-----------------------------------------------------------------------------------------------------------------------------------------------------------------------------------------------------------------------------------------------------------------------------------------------------------------------|
| Random sequence generation (selection bias)               | Unclear risk      | Blocked randomization (3:2), but method is fully specified.                                                                                                                                                                                                                                                           |
| Allocation concealment (selection bias)                   | Unclear risk      | Not described in the manuscript.                                                                                                                                                                                                                                                                                      |
| Blinding of participants and personnel (performance bias) | Unclear risk      | Double-blind, but insufficient data to permit judgement (form of placebo treatment was not described).                                                                                                                                                                                                                |
| Blinding of outcome assessment (detection bias)           | Low risk          | Quote: "The FACS analysis was blinded to the clinical participants and the FACS analyst was also blinded before unblinding day 12."                                                                                                                                                                                   |
| Incomplete outcome data (attrition bias)                  | Low risk          | 1/9 patient from the placebo group was excluded from the study just after the randomization because of SADE (failure to return blood from the column). 2/14 (14%) were excluded from active study group because of adverse event and worsening of the disease, but analysis was conducted on full analyses set basis. |
| Selective reporting (reporting bias)                      | Unclear risk      | Report of adverse events seems to be inadequate.                                                                                                                                                                                                                                                                      |
| Other bias                                                | Low risk          | The study appears to be free of other sources of bias.                                                                                                                                                                                                                                                                |

| <b>Hanai et al. 2004</b>                                  | Authors judgement | Support for judgement                                                                                |
|-----------------------------------------------------------|-------------------|------------------------------------------------------------------------------------------------------|
| Random sequence generation (selection bias)               | Unclear risk      | Randomized study, but method was not specified in the manuscript.                                    |
| Allocation concealment (selection bias)                   | Unclear risk      | Not described in the manuscript.                                                                     |
| Blinding of participants and personnel (performance bias) | High risk         | Not described in the manuscript, but other similar article from the authors was stated as unblinded. |
| Blinding of outcome assessment (detection bias)           | Low risk          | Quote: "Each patient was assessed blindly..."                                                        |

|                                          |          |                                                                              |
|------------------------------------------|----------|------------------------------------------------------------------------------|
| Incomplete outcome data (attrition bias) | Low risk | Number of patients at baseline and at the end of the follow-up are the same. |
| Selective reporting (reporting bias)     | Low risk | Both significant and non-significant results have been reported.             |
| Other bias                               | Low risk | The study appears to be free of other sources of bias.                       |

| <b>Hanai et al. 2008</b>                                  | Authors judgement | Support for judgement                                                       |
|-----------------------------------------------------------|-------------------|-----------------------------------------------------------------------------|
| Random sequence generation (selection bias)               | Unclear risk      | Randomized study, but method is not described in the manuscript.            |
| Allocation concealment (selection bias)                   | Unclear risk      | Not described in the manuscript.                                            |
| Blinding of participants and personnel (performance bias) | High risk         | Stated as unblinded.                                                        |
| Blinding of outcome assessment (detection bias)           | Low risk          | Quote: "Each patient was assessed blindly..."                               |
| Incomplete outcome data (attrition bias)                  | Low risk          | Number of patients at baseline and at the end of the follow-up are the same |
| Selective reporting (reporting bias)                      | Low risk          | Both significant and non-significant results have been reported             |
| Other bias                                                | Low risk          | The study appears to be free of other sources of bias.                      |

| <b>Nakamura et al. 2004</b>                               | Authors judgement | Support for judgement                                                                                                                  |
|-----------------------------------------------------------|-------------------|----------------------------------------------------------------------------------------------------------------------------------------|
| Random sequence generation (selection bias)               | Unclear risk      | Randomized, but the method was not specified in the manuscript                                                                         |
| Allocation concealment (selection bias)                   | Unclear risk      | Not described in the manuscript.                                                                                                       |
| Blinding of participants and personnel (performance bias) | High risk         | Not described in the manuscript, but probably not done, because the trial compared an interventional procedure to drug treatment only. |
| Blinding of outcome assessment (detection bias)           | Unclear risk      | No information                                                                                                                         |
| Incomplete outcome data (attrition bias)                  | Low risk          | 60/66 completed the study; 1 took non-permitted drugs, 1 relapsed just after the randomization, further 4 withdrew the consent.        |

|                                      |          |                                                                 |
|--------------------------------------|----------|-----------------------------------------------------------------|
| Selective reporting (reporting bias) | Low risk | Both significant and non-significant results have been reported |
| Other bias                           | Low risk | The study appears to be free of other sources of bias.          |

| <b>Sands et al. 2008 A study</b>                          | Authors judgement | Support for judgement                                                                                                                                                                              |
|-----------------------------------------------------------|-------------------|----------------------------------------------------------------------------------------------------------------------------------------------------------------------------------------------------|
| Random sequence generation (selection bias)               | Low risk          | Quote: "...using sealed envelopes with sequential numbers issued in blocks of 3..." and                                                                                                            |
| Allocation concealment (selection bias)                   | Low risk          | Quote: "...using sealed envelopes with sequential numbers issued in blocks of 3..." and                                                                                                            |
| Blinding of participants and personnel (performance bias) | Low risk          | Quote: "a polyvinylchloride bypass tube was inserted between the Adacolumn and the Adacircuit to permit bypass of the column among patients undergoing sham procedures."                           |
| Blinding of outcome assessment (detection bias)           | Low risk          | The gastroenterology team was blinded to the treatment assignment.                                                                                                                                 |
| Incomplete outcome data (attrition bias)                  | Low risk          | Intention-to-treat analysis; however, 66% of patients completed the study (6 patients left the study because of disease flare; 5 from apheresis group, 1 from sham group).                         |
| Selective reporting (reporting bias)                      | Low risk          | Both significant and non-significant results have been reported                                                                                                                                    |
| Other bias                                                | High risk         | Quote: "Subjects who withdrew before the week 12 visit were treated as treatment failure for primary end point (clinical remission)."<br>Comment: these imputation of ITT analysis may cause bias. |

| <b>Sands et al. 2008 B study</b>            | Authors judgement | Support for judgement                                                        |
|---------------------------------------------|-------------------|------------------------------------------------------------------------------|
| Random sequence generation (selection bias) | Low risk          | Quote: "Randomization was performed according to a computer-generated scheme |



|                                                           |           |                                                                                                                                                                                                    |
|-----------------------------------------------------------|-----------|----------------------------------------------------------------------------------------------------------------------------------------------------------------------------------------------------|
|                                                           |           | that used an integrated voice response system."                                                                                                                                                    |
| Allocation concealment (selection bias)                   | Low risk  | Quote: "Randomization was performed according to a computer-generated scheme that used an integrated voice response system."                                                                       |
| Blinding of participants and personnel (performance bias) | Low risk  | Quote: "a polyvinylchloride bypass tube was inserted between the Adacolumn and the Adacircuit to permit bypass of the column among patients undergoing sham procedures."                           |
| Blinding of outcome assessment (detection bias)           | Low risk  | The gastroenterology team was blinded to the treatment assignment.                                                                                                                                 |
| Incomplete outcome data (attrition bias)                  | Low risk  | Intention-to-treat analysis; however, 66% of patients completed the study (6 patients left the study because of disease flare; 5 from apheresis group, 1 from sham group).                         |
| Selective reporting (reporting bias)                      | Low risk  | Both significant and non-significant results have been reported                                                                                                                                    |
| Other bias                                                | High risk | Quote: "Subjects who withdrew before the week 12 visit were treated as treatment failure for primary end point (clinical remission)."<br>Comment: these imputation of ITT analysis may cause bias. |

| <b>Sawada et al. 2005</b>                                 | Authors judgement | Support for judgement                                                                                                                                                                 |
|-----------------------------------------------------------|-------------------|---------------------------------------------------------------------------------------------------------------------------------------------------------------------------------------|
| Random sequence generation (selection bias)               | Unclear risk      | minimization by an independent controller.                                                                                                                                            |
| Allocation concealment (selection bias)                   | Unclear risk      | Quote: "The assignment of the enrolled patients to the active group or the sham group was performed by a controller who was independent of the other staff, patients, and relatives." |
| Blinding of participants and personnel (performance bias) | Low risk          | Quote: "Both columns were covered with an opaque material so that they could                                                                                                          |

|                                                 |          |                                                                                                                                                       |
|-------------------------------------------------|----------|-------------------------------------------------------------------------------------------------------------------------------------------------------|
|                                                 |          | not be distinguished by the patients."                                                                                                                |
| Blinding of outcome assessment (detection bias) | Low risk | Quote: "To ensure proper blinding within the clinical evaluation, the medical staffs of each institution were separated into two independent groups." |
| Incomplete outcome data (attrition bias)        | Low risk | All of the enrolled eligible patients were evaluated.                                                                                                 |
| Selective reporting (reporting bias)            | Low risk | All outcomes of interest were reported.                                                                                                               |
| Other bias                                      | Low risk | The study appears to be free of other sources of bias. Comment: these imputation of ITT analysis may cause bias.                                      |

| <b>Emmrich et al. 2006</b>                                | Authors judgement | Support for judgement                                                                                                                  |
|-----------------------------------------------------------|-------------------|----------------------------------------------------------------------------------------------------------------------------------------|
| Random sequence generation (selection bias)               | Unclear risk      | Randomized, but method is not specified in the manuscript.                                                                             |
| Allocation concealment (selection bias)                   | Unclear risk      | Not described in the manuscript.                                                                                                       |
| Blinding of participants and personnel (performance bias) | High risk         | Not described in the manuscript, but probably not done, because the trial compared an interventional procedure to drug treatment only. |
| Blinding of outcome assessment (detection bias)           | Unclear risk      | Not described in the manuscript.                                                                                                       |
| Incomplete outcome data (attrition bias)                  | Low risk          | Only 1/9 patient from active group discontinued the study.                                                                             |
| Selective reporting (reporting bias)                      | Unclear risk      | Report of adverse events seems to be inadequate.                                                                                       |
| Other bias                                                | Low risk          | The study appears to be free of other sources of bias.                                                                                 |

| <b>Fukunaga et al. 2012</b>                               | Authors judgement | Support for judgement                                                                       |
|-----------------------------------------------------------|-------------------|---------------------------------------------------------------------------------------------|
| Random sequence generation (selection bias)               | Low risk          | Blocked randomization according to a computer-generated scheme.                             |
| Allocation concealment (selection bias)                   | Low risk          | Patients were randomized in a 1:1:1 ratio by a statistician at an independent organization. |
| Blinding of participants and personnel (performance bias) | Low risk          | Quote: "Both patients and the physician were blinded by a curtain."                         |

|                                                 |              |                                                                                                                                                                                                                                        |
|-------------------------------------------------|--------------|----------------------------------------------------------------------------------------------------------------------------------------------------------------------------------------------------------------------------------------|
| Blinding of outcome assessment (detection bias) | Unclear risk | Not described in the manuscript.                                                                                                                                                                                                       |
| Incomplete outcome data (attrition bias)        | Low risk     | 21/22 completed the study.                                                                                                                                                                                                             |
| Selective reporting (reporting bias)            | Low risk     | Both significant and non-significant results have been reported.                                                                                                                                                                       |
| Other bias                                      | Unclear risk | Concomitant therapeutic regimen was not described clearly, and the authors stated: "a significant fraction of patients in each arm were on concomitant PSL or AZA and this enabled us to assess the contribution of these medications" |

| <b>Maiden et al. 2008</b>                                 | Authors judgement | Support for judgement                                                                                     |
|-----------------------------------------------------------|-------------------|-----------------------------------------------------------------------------------------------------------|
| Random sequence generation (selection bias)               | Low risk          | Quote: "Randomization was conducted using a linear random number generator of 0 to 1."                    |
| Allocation concealment (selection bias)                   | Unclear risk      | Not described in the manuscript.                                                                          |
| Blinding of participants and personnel (performance bias) | High risk         | Open label                                                                                                |
| Blinding of outcome assessment (detection bias)           | High risk         | Open label                                                                                                |
| Incomplete outcome data (attrition bias)                  | Low risk          | Number of patients at baseline and at the end of the follow-up are the same.                              |
| Selective reporting (reporting bias)                      | Unclear risk      | Report of adverse events seems to be inadequate. Number of events in the control group was not described. |
| Other bias                                                | Low risk          | The study appears to be free of other sources of bias.                                                    |

# Supplementary Figure 3

1  
2  
3  
4  
5  
6  
7  
8  
9  
10  
11  
12  
13  
14  
15  
16  
17  
18  
19  
20  
21  
22  
23  
24  
25  
26  
27  
28  
29  
30  
31  
32  
33  
34  
35  
36  
37  
38  
39  
40  
41  
42  
43  
44  
45  
46  
47  
48  
49  
50  
51  
52  
53  
54  
55  
56  
57  
58  
59  
60

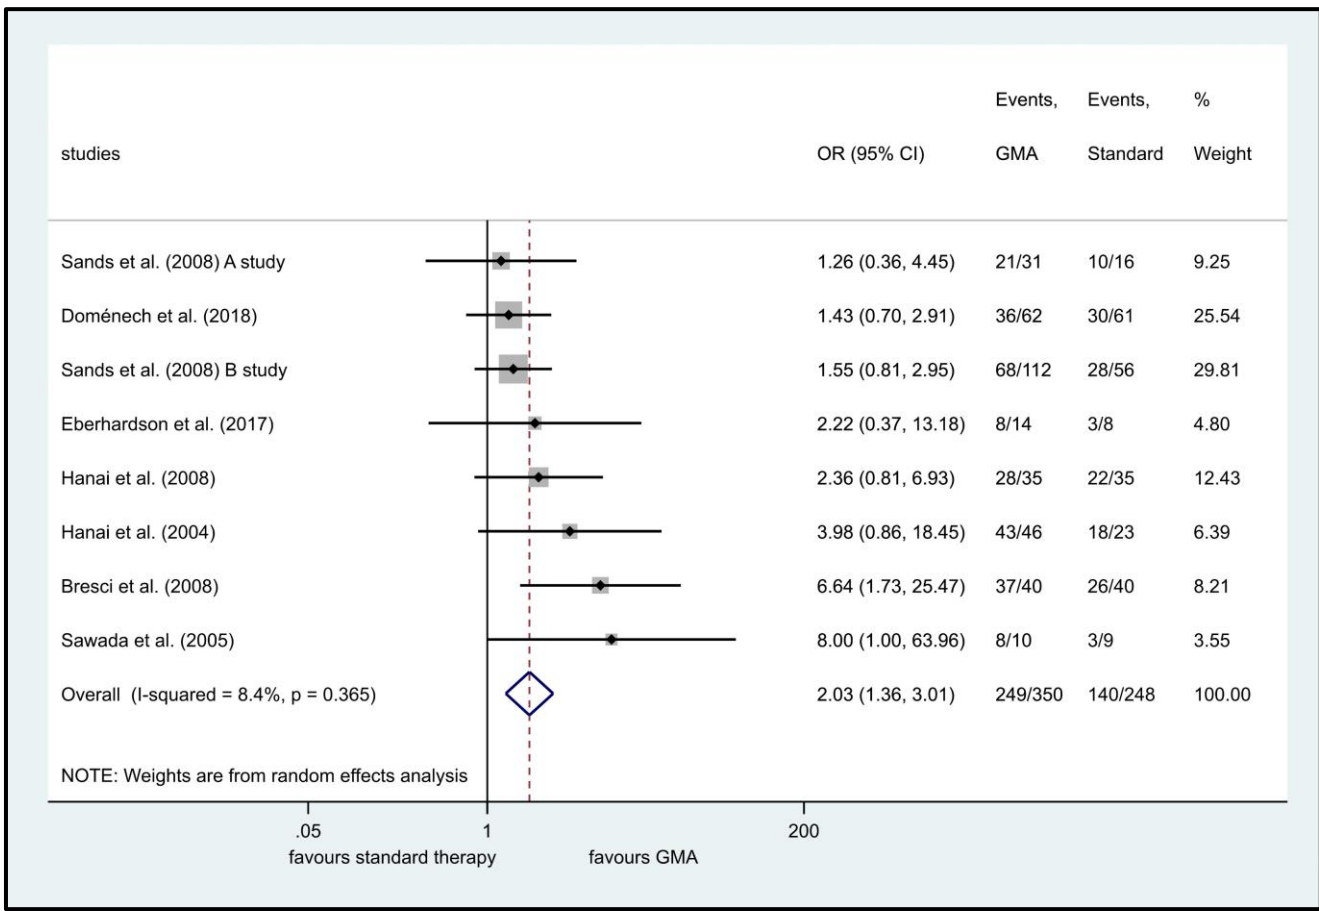

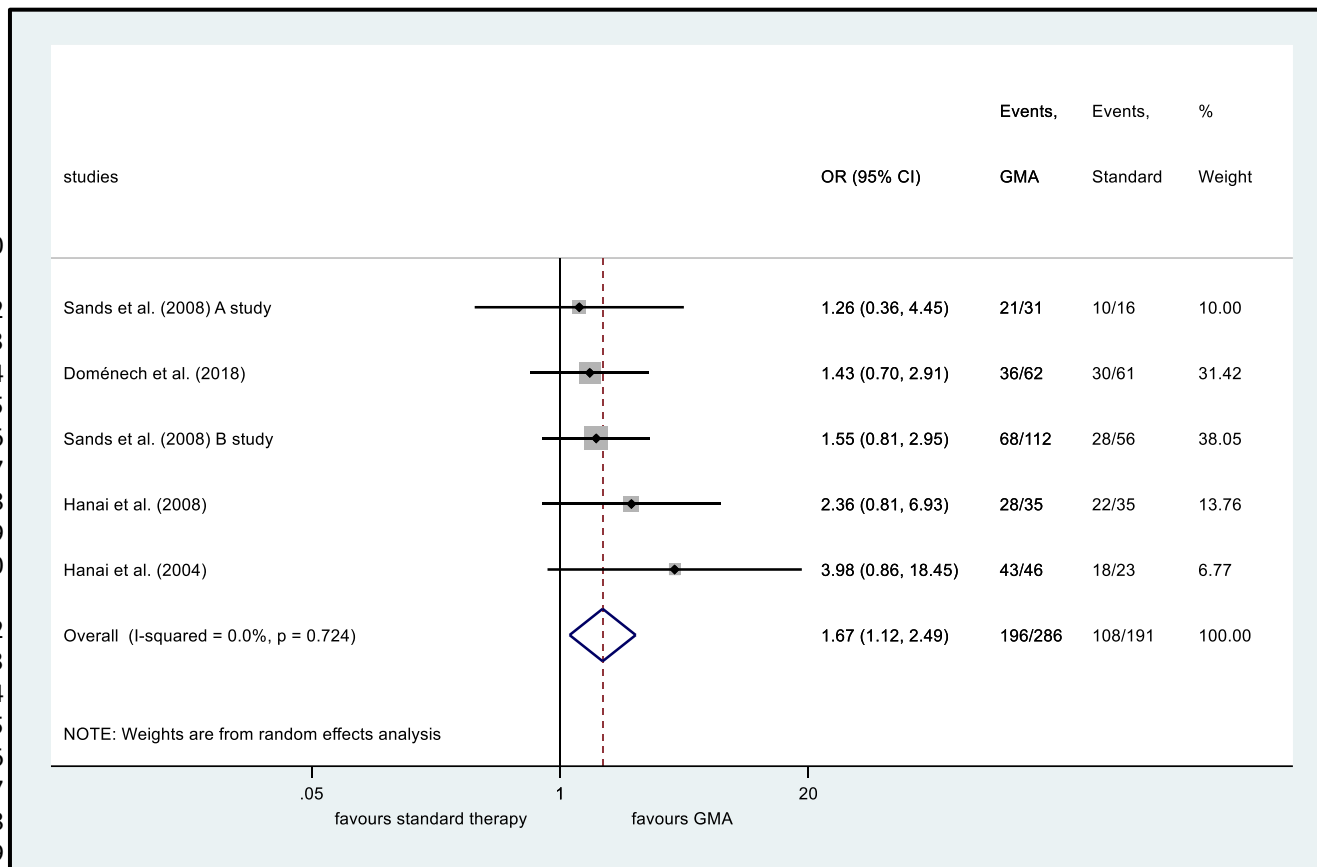

# Supplementary Figure 5

1  
2  
3  
4  
5  
6  
7  
8  
9  
10  
11  
12  
13  
14  
15  
16  
17  
18  
19  
20  
21  
22  
23  
24  
25  
26  
27  
28  
29  
30  
31  
32  
33  
34  
35  
36  
37  
38  
39  
40  
41  
42  
43  
44  
45  
46  
47  
48  
49  
50  
51  
52  
53  
54  
55  
56  
57  
58  
59  
60

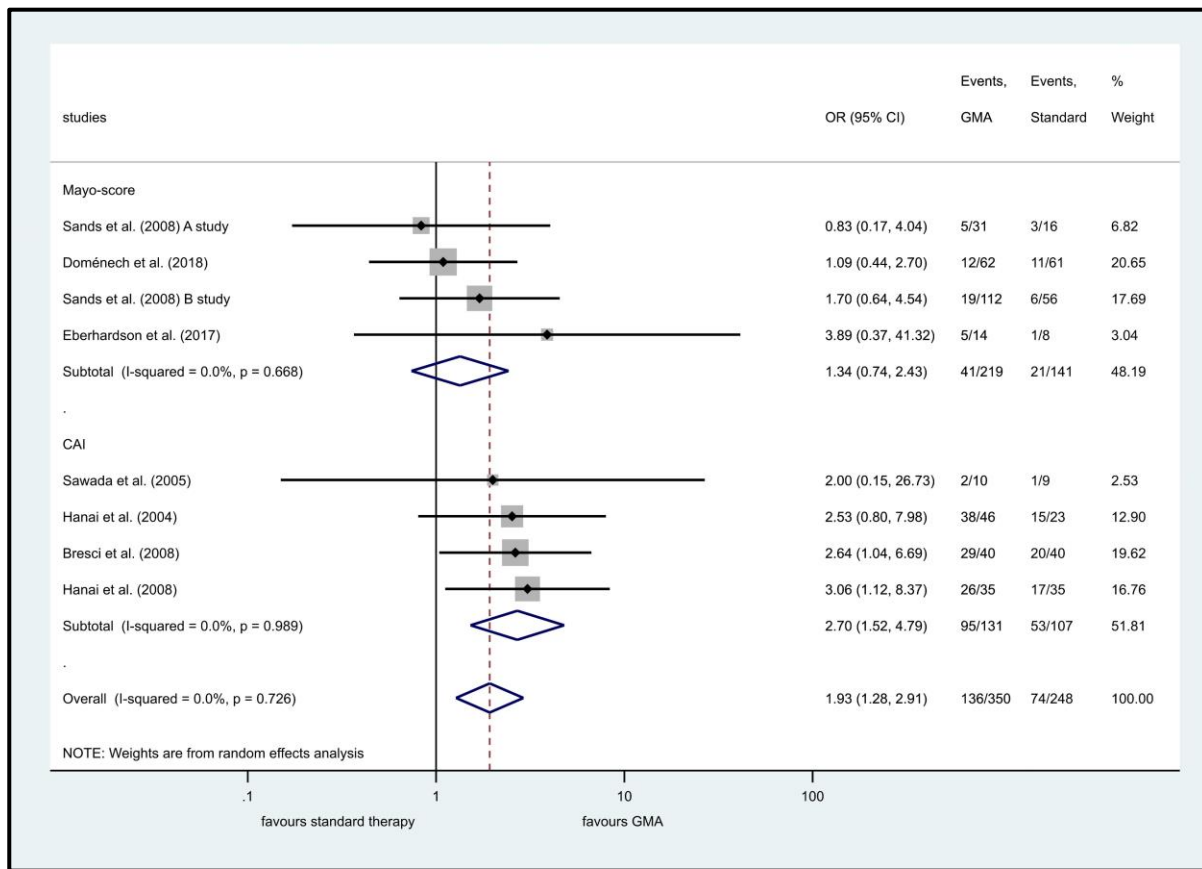

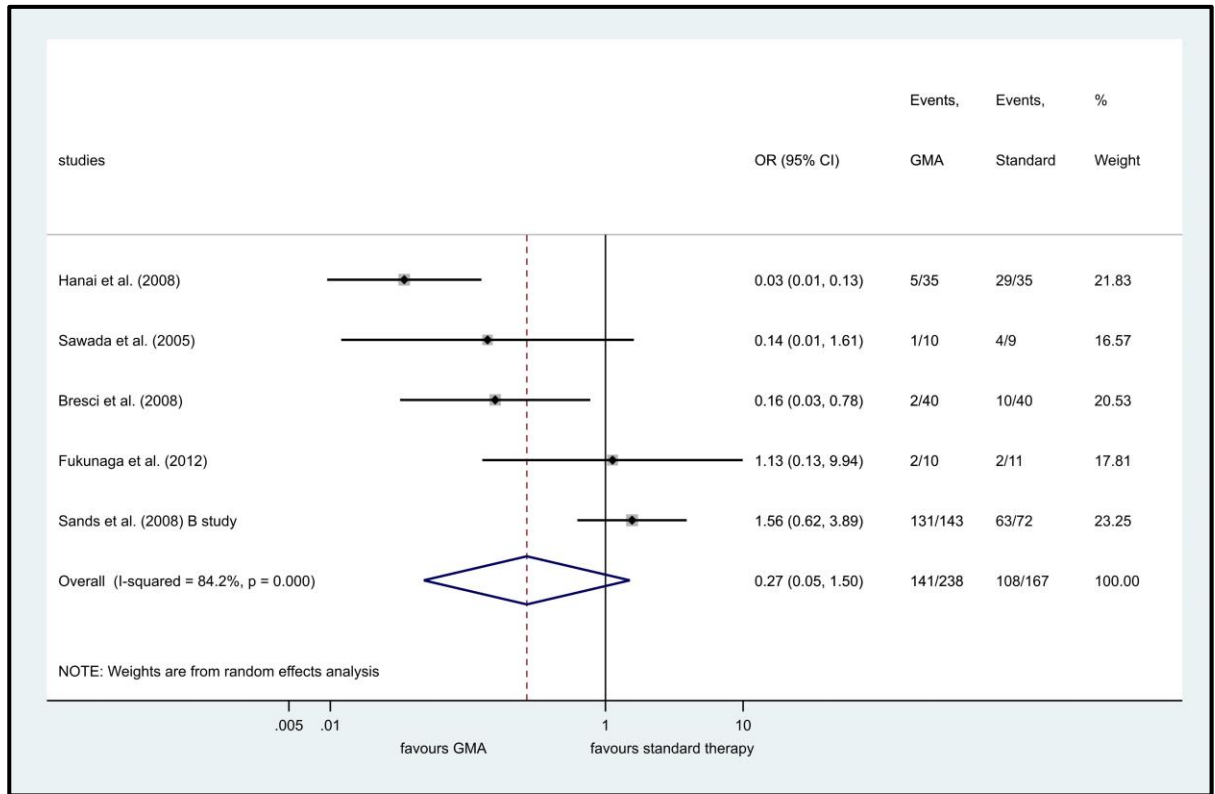

# Supplementary Figure 7

1  
2  
3  
4  
5  
6  
7  
8  
9  
10  
11  
12  
13  
14  
15  
16  
17  
18  
19  
20  
21  
22  
23  
24  
25  
26  
27  
28  
29  
30  
31  
32  
33  
34  
35  
36  
37  
38  
39  
40  
41  
42  
43  
44  
45  
46  
47  
48  
49  
50  
51  
52  
53  
54  
55  
56  
57  
58  
59  
60

**A**

SDI\_patient is a Two-sided graph

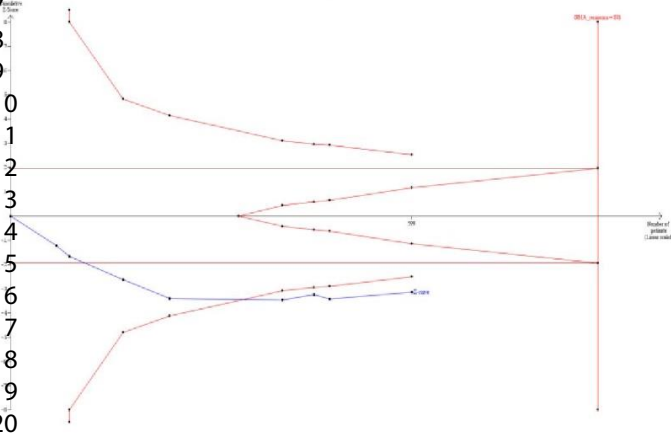

**B**

Residence satisfaction is a Two-sided graph

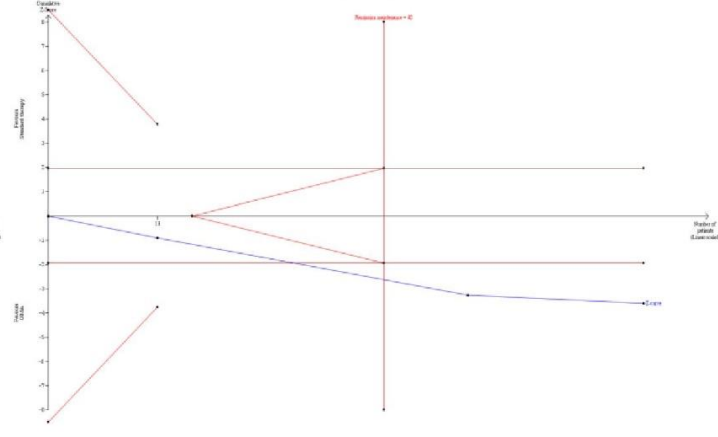

**C**

H1\_CAI is a Two-sided graph

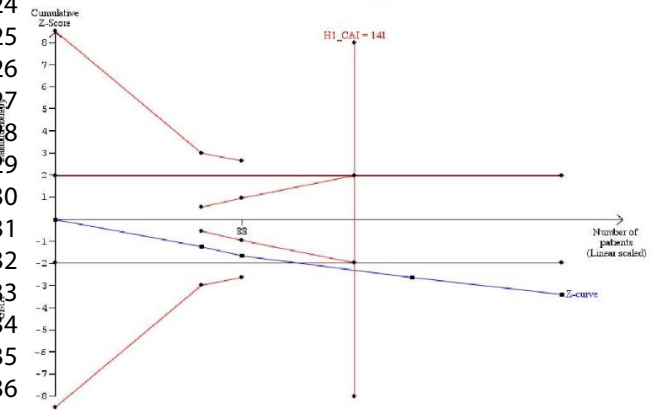

**D**

SDI\_patient is a Two-sided graph

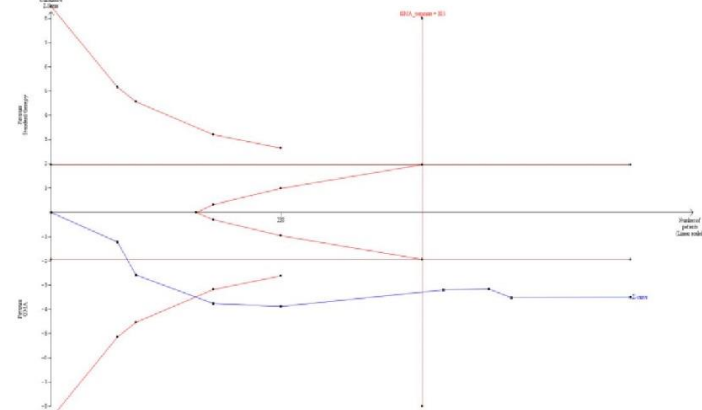



| Study                | Reported adverse events                                                                                                                                                                                                                                           |
|----------------------|-------------------------------------------------------------------------------------------------------------------------------------------------------------------------------------------------------------------------------------------------------------------|
| Hanai et al. 2004    | flushing, nausea, mild fever                                                                                                                                                                                                                                      |
| Sawada et al. 2005   | fever, skin rash, back pain                                                                                                                                                                                                                                       |
| Bresci et al. 2008   | headache, gastrointestinal intolerance, facies lunaris, vascular hypertension, glucose intolerance                                                                                                                                                                |
| Fukunaga et al. 2012 | nausea, skin itchiness                                                                                                                                                                                                                                            |
| Sands et al. 2008    | headache, disease flare-up, decreased diastolic blood pressure, nasopharyngitis, hypotension, nausea, fatigue, post procedure hematoma, abdominal pain, dizziness, vomiting, vessel puncture site bruise, diarrhea, upper respiratory tract infection, flatulence |

## Supplementary Table 2

| Certainty assessment                                                  |                   |              |               |                           |                             |                                     | № of patients                                                                      |                                                   | Effect                            |                                                              | Certainty        | Importance |
|-----------------------------------------------------------------------|-------------------|--------------|---------------|---------------------------|-----------------------------|-------------------------------------|------------------------------------------------------------------------------------|---------------------------------------------------|-----------------------------------|--------------------------------------------------------------|------------------|------------|
| № of studies                                                          | Study design      | Risk of bias | Inconsistency | Indirectness              | Imprecision                 | Other considerations                | standard therapy for clinical remission induction and GMA as an adjunctive therapy | standard therapy for clinical remission induction | Relative (95% CI)                 | Absolute (95% CI)                                            |                  |            |
| <b>Clinical remission rate (assessed with: CAI or Mayo-score)</b>     |                   |              |               |                           |                             |                                     |                                                                                    |                                                   |                                   |                                                              |                  |            |
| 8                                                                     | randomized trials | very serious | not serious   | not serious               | serious                     | none                                | 136/350 (38.9%)                                                                    | 74/249 (29.7%)                                    | <b>OR 1.94</b><br>(1.28 to 2.92)  | <b>153 more per 1 000</b><br>(from 54 more to 255 more)      | ⊕○○○<br>VERY LOW | CRITICAL   |
| <b>Clinical response and clinical improvement (CAI or Mayo-score)</b> |                   |              |               |                           |                             |                                     |                                                                                    |                                                   |                                   |                                                              |                  |            |
| 8                                                                     | randomized trials | very serious | not serious   | not serious               | not serious                 | none                                | 249/350 (71.1%)                                                                    | 140/249 (56.2%)                                   | <b>OR 2.05</b><br>(1.37 to 3.06)  | <b>162 more per 1 000</b><br>(from 75 more to 235 more)      | ⊕⊕○○<br>LOW      | CRITICAL   |
| <b>Clinical remission maintenance rate (assessed with: CAI)</b>       |                   |              |               |                           |                             |                                     |                                                                                    |                                                   |                                   |                                                              |                  |            |
| 3                                                                     | randomized trials | serious      | not serious   | serious <sup>a</sup>      | not serious                 | none                                | 39/36 (108.3%)                                                                     | 17/35 (48.6%)                                     | <b>OR 8.34</b><br>(2.64 to 26.32) | <b>402 more per 1 000</b><br>(from 228 more to 476 more)     | ⊕⊕○○<br>LOW      | CRITICAL   |
| <b>Adverse events</b>                                                 |                   |              |               |                           |                             |                                     |                                                                                    |                                                   |                                   |                                                              |                  |            |
| 5                                                                     | randomized trials | very serious | not serious   | very serious <sup>b</sup> | very serious <sup>c,d</sup> | publication bias strongly suspected | 141/238 (59.2%)                                                                    | 108/167 (64.7%)                                   | <b>OR 0.27</b><br>(0.05 to 1.50)  | <b>316 fewer per 1 000</b><br>(from 563 fewer to 86 more)    | ⊕○○○<br>VERY LOW | IMPORTANT  |
| <b>Steroid-sparing effect</b>                                         |                   |              |               |                           |                             |                                     |                                                                                    |                                                   |                                   |                                                              |                  |            |
| 3                                                                     | randomized trials | serious      | not serious   | not serious               | very serious <sup>d</sup>   | none                                | 66                                                                                 | 43                                                | -                                 | <b>WMD 6.83 mg/day lower</b><br>(14.47 lower to 0.81 higher) | ⊕○○○<br>VERY LOW | IMPORTANT  |

CI: Confidence interval; OR: Odds ratio

### Explanations

a. Duration of follow-up differs among studies (6 months or 12 months). b. Pool of adverse events differs among studies. c. The optimal information size criterion is not met. d. TSA could not be carried out.



# PRISMA 2009 Checklist

| Section/topic                      | #  | Checklist item                                                                                                                                                                                                                                                                                              | Reported on page # |
|------------------------------------|----|-------------------------------------------------------------------------------------------------------------------------------------------------------------------------------------------------------------------------------------------------------------------------------------------------------------|--------------------|
| <b>TITLE</b>                       |    |                                                                                                                                                                                                                                                                                                             |                    |
| Title                              | 1  | Identify the report as a systematic review, meta-analysis, or both.                                                                                                                                                                                                                                         | 1                  |
| <b>ABSTRACT</b>                    |    |                                                                                                                                                                                                                                                                                                             |                    |
| Structured summary                 | 2  | Provide a structured summary including, as applicable: background; objectives; data sources; study eligibility criteria, participants, and interventions; study appraisal and synthesis methods; results; limitations; conclusions and implications of key findings; systematic review registration number. | 2                  |
| <b>INTRODUCTION</b>                |    |                                                                                                                                                                                                                                                                                                             |                    |
| Rationale                          | 3  | Describe the rationale for the review in the context of what is already known.                                                                                                                                                                                                                              | 3                  |
| Objectives                         | 4  | Provide an explicit statement of questions being addressed with reference to participants, interventions, comparisons, outcomes, and study design (PICOS).                                                                                                                                                  | 3-4                |
| <b>METHODS</b>                     |    |                                                                                                                                                                                                                                                                                                             |                    |
| Protocol and registration          | 5  | Indicate if a review protocol exists, if and where it can be accessed (e.g., Web address), and, if available, provide registration information including registration number.                                                                                                                               | 2, 3               |
| Eligibility criteria               | 6  | Specify study characteristics (e.g., PICOS, length of follow-up) and report characteristics (e.g., years considered, language, publication status) used as criteria for eligibility, giving rationale.                                                                                                      | 4                  |
| Information sources                | 7  | Describe all information sources (e.g., databases with dates of coverage, contact with study authors to identify additional studies) in the search and date last searched.                                                                                                                                  | 3, 4               |
| Search                             | 8  | Present full electronic search strategy for at least one database, including any limits used, such that it could be repeated.                                                                                                                                                                               | Suppl.             |
| Study selection                    | 9  | State the process for selecting studies (i.e., screening, eligibility, included in systematic review, and, if applicable, included in the meta-analysis).                                                                                                                                                   | 4                  |
| Data collection process            | 10 | Describe method of data extraction from reports (e.g., piloted forms, independently, in duplicate) and any processes for obtaining and confirming data from investigators.                                                                                                                                  | 4                  |
| Data items                         | 11 | List and define all variables for which data were sought (e.g., PICOS, funding sources) and any assumptions and simplifications made.                                                                                                                                                                       | 4                  |
| Risk of bias in individual studies | 12 | Describe methods used for assessing risk of bias of individual studies (including specification of whether this was done at the study or outcome level), and how this information is to be used in any data synthesis.                                                                                      | 4, 5               |
| Summary measures                   | 13 | State the principal summary measures (e.g., risk ratio, difference in means).                                                                                                                                                                                                                               | 5                  |
| Synthesis of results               | 14 | Describe the methods of handling data and combining results of studies, if done, including measures of consistency (e.g., $I^2$ ) for each meta-analysis.                                                                                                                                                   | 5-6                |

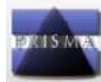

# PRISMA 2009 Checklist

| Section/topic                 | #  | Checklist item                                                                                                                                                                                           | Reported on page #                              |
|-------------------------------|----|----------------------------------------------------------------------------------------------------------------------------------------------------------------------------------------------------------|-------------------------------------------------|
| Risk of bias across studies   | 15 | Specify any assessment of risk of bias that may affect the cumulative evidence (e.g., publication bias, selective reporting within studies).                                                             | 5                                               |
| Additional analyses           | 16 | Describe methods of additional analyses (e.g., sensitivity or subgroup analyses, meta-regression), if done, indicating which were pre-specified.                                                         | 5                                               |
| <b>RESULTS</b>                |    |                                                                                                                                                                                                          |                                                 |
| Study selection               | 17 | Give numbers of studies screened, assessed for eligibility, and included in the review, with reasons for exclusions at each stage, ideally with a flow diagram.                                          | 5, Figure 1                                     |
| Study characteristics         | 18 | For each study, present characteristics for which data were extracted (e.g., study size, PICOS, follow-up period) and provide the citations.                                                             | 5, 6, Table 1                                   |
| Risk of bias within studies   | 19 | Present data on risk of bias of each study and, if available, any outcome level assessment (see item 12).                                                                                                | 6, Suppl. Figure 1                              |
| Results of individual studies | 20 | For all outcomes considered (benefits or harms), present, for each study: (a) simple summary data for each intervention group (b) effect estimates and confidence intervals, ideally with a forest plot. | 6, Figure 2-3, Suppl. Figure 4-5                |
| Synthesis of results          | 21 | Present the main results of the review. If meta-analyses are done, include for each, confidence intervals and measures of consistency                                                                    | 9, Figure 2-3, Suppl. Figure 3, Suppl. Figure 6 |
| Risk of bias across studies   | 22 | Present results of any assessment of risk of bias across studies (see Item 15).                                                                                                                          | Suppl. Figure 2                                 |
| Additional analysis           | 23 | Give results of additional analyses, if done (e.g., sensitivity or subgroup analyses, meta-regression [see Item 16]).                                                                                    | Suppl. Figure 4-5; Suppl. Figure 7              |
| <b>DISCUSSION</b>             |    |                                                                                                                                                                                                          |                                                 |
| Summary of evidence           | 24 | Summarize the main findings including the strength of evidence for each main outcome; consider their relevance to key groups (e.g., healthcare providers, users, and policy makers).                     | Suppl. Table 1                                  |



# PRISMA 2009 Checklist

|                |    |                                                                                                                                                               |      |
|----------------|----|---------------------------------------------------------------------------------------------------------------------------------------------------------------|------|
| Limitations    | 25 | Discuss limitations at study and outcome level (e.g., risk of bias), and at review-level (e.g., incomplete retrieval of identified research, reporting bias). | 2, 9 |
| Conclusions    | 26 | Provide a general interpretation of the results in the context of other evidence, and implications for future research.                                       | 9    |
| <b>FUNDING</b> |    |                                                                                                                                                               |      |
| Funding        | 27 | Describe sources of funding for the systematic review and other support (e.g., supply of data); role of funders for the systematic review.                    | 10   |

From: Moher D, Liberati A, Tetzlaff J, Altman DG, The PRISMA Group (2009). Preferred Reporting Items for Systematic Reviews and Meta-Analyses: The PRISMA Statement. PLoS Med 6(7): e1000097. doi:10.1371/journal.pmed1000097

For more information, visit: [www.prisma-statement.org](http://www.prisma-statement.org).

Page 2 of 2

# BMJ Open

## Granulocyte and monocyte apheresis as an adjunctive therapy to induce and maintain clinical remission in ulcerative colitis: A systematic review and meta-analysis

|                                 |                                                                                                                                                                                                                                                                                                                                                                                                                                                                                                                                                                                                                                                                                                                                                                                                                                                                                                                                                                                                                                                                                                                                                                                                                                                                                                                                                                                                                                                                                                                                                                                                                   |
|---------------------------------|-------------------------------------------------------------------------------------------------------------------------------------------------------------------------------------------------------------------------------------------------------------------------------------------------------------------------------------------------------------------------------------------------------------------------------------------------------------------------------------------------------------------------------------------------------------------------------------------------------------------------------------------------------------------------------------------------------------------------------------------------------------------------------------------------------------------------------------------------------------------------------------------------------------------------------------------------------------------------------------------------------------------------------------------------------------------------------------------------------------------------------------------------------------------------------------------------------------------------------------------------------------------------------------------------------------------------------------------------------------------------------------------------------------------------------------------------------------------------------------------------------------------------------------------------------------------------------------------------------------------|
| Journal:                        | <i>BMJ Open</i>                                                                                                                                                                                                                                                                                                                                                                                                                                                                                                                                                                                                                                                                                                                                                                                                                                                                                                                                                                                                                                                                                                                                                                                                                                                                                                                                                                                                                                                                                                                                                                                                   |
| Manuscript ID                   | bmjopen-2020-042374.R2                                                                                                                                                                                                                                                                                                                                                                                                                                                                                                                                                                                                                                                                                                                                                                                                                                                                                                                                                                                                                                                                                                                                                                                                                                                                                                                                                                                                                                                                                                                                                                                            |
| Article Type:                   | Original research                                                                                                                                                                                                                                                                                                                                                                                                                                                                                                                                                                                                                                                                                                                                                                                                                                                                                                                                                                                                                                                                                                                                                                                                                                                                                                                                                                                                                                                                                                                                                                                                 |
| Date Submitted by the Author:   | 31-Mar-2021                                                                                                                                                                                                                                                                                                                                                                                                                                                                                                                                                                                                                                                                                                                                                                                                                                                                                                                                                                                                                                                                                                                                                                                                                                                                                                                                                                                                                                                                                                                                                                                                       |
| Complete List of Authors:       | <p>Kiss, Szabolcs; University of Szeged, Doctoral School of Clinical Medicine; University of Pecs Medical School, Institute for Translational Medicine</p> <p>Németh, Dávid; University of Pecs Medical School, Institute for Translational Medicine</p> <p>Hegyi, Péter; University of Pecs Medical School, Institute for Translational Medicine; University of Pecs, János Szentágotthai Research Centre</p> <p>Földi, Mária ; Szegedi Tudományegyetem, Doctoral School of Clinical Medicine, University of Szeged; University of Pecs Medical School, Institute for Translational Medicine</p> <p>Szakács, Zsolt; University of Pecs Medical School, Institute for Translational Medicine; University of Pecs, János Szentágotthai Research Centre</p> <p>Erőss, Bálint; University of Pecs Medical School, Institute for Translational Medicine; University of Pecs, János Szentágotthai Research Centre</p> <p>Tinusz, Benedek; University of Pecs Medical School, First Department of Medicine</p> <p>Hegyi, Péter Jenő; University of Pecs Medical School, Institute for Translational Medicine; University of Pecs Medical School, Division of Gastroenterology, First Department of Medicine</p> <p>Sarlós, Patrícia; University of Pecs Medical School, Institute for Translational Medicine; University of Pecs Medical School, Division of Gastroenterology, First Department of Medicine</p> <p>Hussain, Alizadeh; Szegedi Tudományegyetem, Doctoral School of Clinical Medicine, University of Szeged; University of Pecs Medical School, Division of Haematology, First Department of Medicine</p> |
| <b>Primary Subject Heading</b>: | Gastroenterology and hepatology                                                                                                                                                                                                                                                                                                                                                                                                                                                                                                                                                                                                                                                                                                                                                                                                                                                                                                                                                                                                                                                                                                                                                                                                                                                                                                                                                                                                                                                                                                                                                                                   |
| Secondary Subject Heading:      | Haematology (incl blood transfusion)                                                                                                                                                                                                                                                                                                                                                                                                                                                                                                                                                                                                                                                                                                                                                                                                                                                                                                                                                                                                                                                                                                                                                                                                                                                                                                                                                                                                                                                                                                                                                                              |
| Keywords:                       | Inflammatory bowel disease < GASTROENTEROLOGY, IMMUNOLOGY, Gastroenterology < INTERNAL MEDICINE, HAEMATOLOGY                                                                                                                                                                                                                                                                                                                                                                                                                                                                                                                                                                                                                                                                                                                                                                                                                                                                                                                                                                                                                                                                                                                                                                                                                                                                                                                                                                                                                                                                                                      |
|                                 |                                                                                                                                                                                                                                                                                                                                                                                                                                                                                                                                                                                                                                                                                                                                                                                                                                                                                                                                                                                                                                                                                                                                                                                                                                                                                                                                                                                                                                                                                                                                                                                                                   |

1  
2  
3  
4  
5  
6  
7  
8  
9  
10  
11  
12  
13  
14  
15  
16  
17  
18  
19  
20  
21  
22  
23  
24  
25  
26  
27  
28  
29  
30  
31  
32  
33  
34  
35  
36  
37  
38  
39  
40  
41  
42  
43  
44  
45  
46  
47  
48  
49  
50  
51  
52  
53  
54  
55  
56  
57  
58  
59  
60





I, the Submitting Author has the right to grant and does grant on behalf of all authors of the Work (as defined in the below author licence), an exclusive licence and/or a non-exclusive licence for contributions from authors who are: i) UK Crown employees; ii) where BMJ has agreed a CC-BY licence shall apply, and/or iii) in accordance with the terms applicable for US Federal Government officers or employees acting as part of their official duties; on a worldwide, perpetual, irrevocable, royalty-free basis to BMJ Publishing Group Ltd ("BMJ") its licensees and where the relevant Journal is co-owned by BMJ to the co-owners of the Journal, to publish the Work in this journal and any other BMJ products and to exploit all rights, as set out in our [licence](#).

The Submitting Author accepts and understands that any supply made under these terms is made by BMJ to the Submitting Author unless you are acting as an employee on behalf of your employer or a postgraduate student of an affiliated institution which is paying any applicable article publishing charge ("APC") for Open Access articles. Where the Submitting Author wishes to make the Work available on an Open Access basis (and intends to pay the relevant APC), the terms of reuse of such Open Access shall be governed by a Creative Commons licence – details of these licences and which [Creative Commons](#) licence will apply to this Work are set out in our licence referred to above.

Other than as permitted in any relevant BMJ Author's Self Archiving Policies, I confirm this Work has not been accepted for publication elsewhere, is not being considered for publication elsewhere and does not duplicate material already published. I confirm all authors consent to publication of this Work and authorise the granting of this licence.



1  
2  
3  
4  
5  
6  
7  
8

# Granulocyte and monocyte apheresis as an adjunctive therapy to induce and maintain clinical remission in ulcerative colitis: A systematic review and meta-analysis

9 1 Szabolcs Kiss<sup>1,2</sup>, Dávid Németh<sup>2</sup>, Péter Hegyi<sup>2,3</sup>, Mária Földi<sup>1,2</sup>, Zsolt Szakács<sup>2,3</sup>, Bálint Erőss<sup>2,3</sup>,  
10 2 Benedek Tinusz<sup>4</sup>, Péter Jenő Hegyi<sup>2,5</sup>, Patrícia Sarlós<sup>2,5</sup>, Hussain Alizadeh<sup>1,6\*</sup>

11  
12 3 <sup>1</sup>Doctoral School of Clinical Medicine, University of Szeged, Szeged, Hungary

13  
14 4 <sup>2</sup>Institute for Translational Medicine, Medical School, University of Pécs, Pécs, Hungary

15  
16 5 <sup>3</sup>János Szentágothai Research Centre, University of Pécs, Pécs, Hungary

17  
18 6 <sup>4</sup>First Department of Medicine, Medical School, University of Pécs, Pécs, Hungary

19  
20 7 <sup>5</sup>Division of Gastroenterology, First Department of Medicine, Medical School, University of Pécs,  
21 8 Pécs, Hungary

22  
23 9 <sup>6</sup>Division of Haematology, First Department of Medicine, Medical School, University of Pécs, Pécs,  
24 10 Hungary

25  
26 11 \* **Correspondence:**

27 12 Alizadeh Hussain M.D., Ph.D., Address: First Department of Medicine, University of Pécs Medical  
28 13 School, H-7624 Pécs, Ifjúság útja 13., Hungary; Tel: +(36-30) 643-6099

29 14 E-mail: alizadeh.hussain@pte.hu

30  
31 15 **Keywords:** Inflammatory bowel disease; IMMUNOLOGY; Gastroenterology;  
32 16 HAEMATOLOGY

## 1 Abstract

**Objective:** The goal of treatment in ulcerative colitis (UC) is to induce and maintain remission. The addition of granulocyte and monocyte apheresis (GMA) to conventional therapy may be a promising therapeutic alternative. In this meta-analysis, we aimed to assess the efficacy and safety profile of GMA as an adjunctive therapy.

**Design:** Systematic review and meta-analysis.

**Methods:** We searched four databases (MEDLINE, Embase, Web of Science, and Cochrane Central Register of Controlled Trials) for randomized or minimized controlled trials which discussed the impact of additional GMA therapy on clinical remission induction and clinical remission maintenance compared to conventional therapy alone. Primary outcome were clinical remission induction and maintenance, secondary outcomes were adverse events and steroid-sparing effect. Odds ratios (OR) with 95% confidence intervals were calculated. Trial Sequential Analyses (TSA) were performed to adjust for the risk of random errors in meta-analyses.

**Results:** A total of eleven studies were eligible for meta-analysis. GMA was clearly demonstrated to induce and maintain clinical remission more effectively than conventional therapy alone (598 patients: OR: 1.93, CI: 1.28–2.91,  $p=0.002$ ,  $I^2=0.0\%$  for induction; 71 patients: OR: 8.34, CI: 2.64–26.32,  $p<0.001$ ,  $I^2=0.0\%$  for maintenance). There was no statistically significant difference in the number of adverse events (OR: 0.27, CI: 0.05–1.50,  $p=0.135$ ,  $I^2=84.2\%$ )

**Conclusion:** GMA appears to be more effective as an adjunctive treatment in inducing and maintaining remission in UC patients than conventional therapy alone.

**Protocol registration number:** PROSPERO CRD42019134050.

Word count: 4199

## 2 Article Summary

### Strengths and limitations of this study

- This is the first meta-analysis assessing the role of GMA in clinical remission maintenance in ulcerative colitis.
- Grading of Recommendations Assessment, Development and Evaluation approach was applied to appraise the certainty of evidence.
- Our results are limited by the relatively low number of patients and the heterogenous reporting of adverse events.
- To address the limitation by the number of included patients and to control both type I and type II errors, Trial Sequential Analyses have been performed.

### 3 Introduction

Ulcerative colitis (UC) is one of two major types of inflammatory bowel disease (IBD). The incidence of this disease varies from nine to 20 cases per 100 000 person-years (1). UC is a lifelong illness that has a profound impact on patients. The primary goal of treatment is to achieve and maintain remission, thereby preventing colectomy and colorectal neoplasms and ensuring an acceptable quality of life (2). The choice of treatment for patients with UC is tied to the clinical and endoscopic severity of the disease along with the frequency and severity of relapses. Patients with no response to conventional therapies, especially to corticosteroids and immunosuppressive agents, are common candidates for biological treatments and/or surgery. However, both of these options are challenged by the high costs and incidence of side-effects and complications.

Patients with UC usually have a raised level of granulocytes, and, in the case of an active disease, the mucosa of the bowel is infiltrated by a large number of granulocytes and macrophages. These leukocytes release degradative enzymes and proinflammatory cytokines, which lead to further inflammation of the bowel. Based on the hypothesis that a reduction of activated granulocytes and monocytes/macrophages may be beneficial, granulocyte-monocyte apheresis (GMA) was proposed as a strategy to promote remission in active UC (3). GMA is a novel non-pharmacological treatment tool for patients with UC, comprising an extra-corporeal absorptive circuit, which decreases inflammatory cytokines and upregulates regulatory T cells. Despite its high cost, GMA seems to have a good safety profile (3).

However, data on the efficacy of GMA are still debated. The first studies published in Japan showed remission or response rates of up to 60–80% (4-6). Sands et al. reported a study with a large number of patients comparing GMA to a placebo, and they found no significant difference in terms of clinical response (7). This substantial difference between studies could be explained by the heterogeneity of patients' characteristics, most probably by the varying severity and extent of the disease.

A large proportion of patients require long-term, high-dose steroid treatment, which often results in severe side-effects impairing patients' quality of life. If addition of GMA can reduce the dose of corticosteroids, the risk of steroid-induced adverse events (AEs) could be minimized. Therefore, it is also essential to evaluate the steroid-sparing effects of GMA (8). Beyond the induction of remission and the impact on steroid requirement, the role of GMA in maintaining remission is unclear (9). The aim of our study was to assess the role of GMA in the induction and maintenance of clinical remission in UC and to evaluate the potential steroid-sparing effect of the therapy.

### 4 Methods

The meta-analysis was reported in accordance with the Preferred Reporting Items for Systematic Reviews and Meta-Analyses Statement (10). The review protocol was registered on the PROSPERO International Prospective Register of Systematic Reviews (CRD42019134050).

#### 4.1 Search strategy

The systematic literature search was conducted by two independent reviewers (KS and FM) in MEDLINE (via PubMed), EMBASE, Cochrane Central Register of Controlled Trials (CENTRAL), and Web of Science for studies published up to 5<sup>th</sup> March 2019. The search query in each database was based on PICO components combined with Boolean operators: (gma OR apheresis OR adsorption OR "cell separation" OR leukapher\* OR leukopher\* OR leukocytapher\* OR leukocytopher\* OR lymphapher\* OR lymphopher\* OR lymphocytopher\* OR lymphocytapher\*) AND ("inflammatory

92 bowel disease” OR “ulcerative colitis”) AND (random\*). Details of our search strategy and terms are  
93 presented in supplementary material.

## 94 4.2 Eligibility criteria

95 General criteria: a randomized controlled trial (RCT) or minimized controlled trial (This type of  
96 sequence generation is considered to be nearly equivalent to being random) (11); only full-text articles  
97 were included.

98 Specific criteria for clinical remission induction: patients with active UC (*Population<sub>1</sub>*),  
99 standard therapy for remission induction and GMA as an adjunctive therapy (*Intervention<sub>1</sub>*), and  
100 standard therapy for remission induction (*Comparison<sub>1</sub>*); *Outcomes<sub>1</sub>*: clinical response rate and clinical  
101 remission rate (defined either by the clinical activity index (CAI) or full Mayo score) and AEs.

102 Specific criteria for clinical remission maintenance: patients with UC in clinical remission  
103 induced by GMA (*Population<sub>2</sub>*), standard therapy for remission maintenance and GMA as an  
104 adjunctive therapy (*Intervention<sub>2</sub>*), and standard therapy for remission maintenance (*Comparison<sub>2</sub>*);  
105 *Outcomes<sub>2</sub>*: rate of maintained remission (defined either by the CAI or full Mayo score) and AEs.

106 Outcome criteria for clinical remission and clinical response were defined individually by the  
107 eligible articles. These criteria are presented in **Table 1**. Regarding safety, AEs reported by the  
108 individual article were used for the analyses in each case. No preliminary specification was made.

109 The titles of the studies were screened based on predefined criteria, and the relevant studies  
110 were selected for abstract review. If the abstract was found to be appropriate, the full text of the article  
111 was studied. The decision to include a study in the meta-analysis was based on an independent  
112 assessment by the two reviewers and eventually by consensus for resolution of any disagreements.  
113 Reference lists in included studies and reviews on this topic were searched for additional studies.  
114 Publications citing the included studies were also screened in the Google Scholar academic search  
115 engine.

## 116 4.3 Data extraction

117 The two investigators (KS and FM) reviewed the articles independently and extracted data into a  
118 standardized data collection form (discrepancies were resolved based on consensus). For the selected  
119 studies, characteristics were extracted, including publication year, country, number of centres, number  
120 of patients, and study design. In addition, patient characteristics (age, sex, and extent of disease), details  
121 of therapy (concomitant medication, volume of GMA, number of GMA cycles, and duration of  
122 treatment), and main outcomes (number of patients with clinical improvement/response, number of  
123 patients achieving clinical remission, number of patients with maintained remission, and number of  
124 AEs) were also extracted.

## 125 4.4 Risk of bias assessment

126 The Cochrane Risk of Bias Tool was used by the two independent investigators (KS and FM) to assess  
127 the quality of the studies included. Any disagreement was resolved based on consensus (12). Major  
128 domains of quality assessment were the following:

- 129 1. Random sequence generation (selection bias)
- 130 2. Allocation concealment (selection bias)
- 131 3. Blinding of participants and personnel (performance bias)
- 132 4. Blinding of outcome assessment (detection bias)

- 1
- 2 133 5. Incomplete outcome data (attrition bias)
- 3 134 6. Selective reporting (reporting bias)
- 4 135 7. Other bias (early stopping, baseline imbalance, blocked randomization with unblinded trials,
- 5 136 and imputation of intention-to-treat (ITT) analysis)
- 6

#### 7 137 **4.5 Statistical analysis**

9 138 The effect measure of dichotomous variables was reported for each outcome as the odds ratio (OR)  
10 139 with the related 95% confidence interval (8). All tests were 2-sided, and a p value <0.05 was considered  
11 140 statistically significant (except for heterogeneity, for which a p value <0.10 was considered  
12 141 significant). Weighted mean difference (WMD) was calculated for continuous variables. Values of OR,  
13 142 WMD, and weights are presented in forest plots. The random-effects model was used to pool effect  
14 143 sizes. Heterogeneity was tested both by performing Cochran's Q test and calculating  
15 144 Higgins' I<sup>2</sup> indicator (13, 14). The Q statistics were computed as the squared deviations from the  
16 145 pooled effect of the weighted sum of individual study effects, with the weights being used in the  
17 146 pooling method. P values were obtained by comparing test statistics with a chi-square with k-1 degrees  
18 147 of freedom (where k was the number of studies). The I<sup>2</sup> index corresponds to the percentage of the total  
19 148 variability across studies due to heterogeneity. A rough classification of its value based on the Cochrane  
20 149 Handbook for Systematic Reviews of Interventions is the following: low (0–40%), moderate (30–  
21 150 60%), substantial (50–90%), and considerable (75–100%) (11). Subgroup analysis was performed as  
22 151 described in the study protocol if a sufficient number of studies was available. Funnel plots were used  
23 152 to test the presence of publication bias. A Trial Sequential Analysis (TSA 0.9.5.10.) was also performed  
24 153 for the randomized controlled studies to quantify the statistical reliability and to estimate the optimal  
25 154 information size (OIS). This methodology combines an information size with the threshold of statistical  
26 155 significance. All the statistical analyses were performed using Comprehensive Meta-Analysis (version  
27 156 3, Biostat Inc., Englewood, NJ, USA) and StataIC (version 15.1).

#### 32 157 **4.6 Quality of evidence**

33 158 The GRADE approach was used by the two independent reviewers (KS and FM) to assess the quality  
34 159 of evidence for each outcome (15, 16). Disagreements were resolved by consensus.

### 37 160 **5 Results**

#### 39 161 **5.1 Search and selection**

40 162 The search process is shown in **Figure 1**. A total of 334 records were identified in the databases. After  
41 163 screening and assessment for eligibility, eleven full-text articles containing one minimized controlled  
42 164 trial and eleven RCTs were included for analysis. Eight studies provided data on patients with active  
43 165 UC, and three studies contained data on patients with UC in clinical remission.

#### 47 166 **5.2 Characteristics of the studies included**

48 167 The characteristics of the included studies are presented in **Table 1**. In the case of clinical remission  
49 168 induction, all the studies were RCTs, except for the one study with minimization (17). A total of 598  
50 169 participants (mean: 77, ranging from 19 to 168) were included in this meta-analysis: 350 patients  
51 170 received GMA, and 248 were in control groups. All the participants had active UC and were treated  
52 171 with Adacolumn® (7, 17-23). Four of these trials were sham-controlled. All the patients received  
53 172 standard of care added to the intervention/comparator and they did not receive any anti-TNF agent.

Both GMA and control were added to conventional treatment. In terms of main outcomes, the studies investigated the rate of clinical remission and clinical response. Investigators assessed the activity of UC with either the Mayo score or CAI. One study required steroid-free remission to regard cases as being in clinical remission.

In the case of clinical remission maintenance, all the studies were randomized controlled trials. A total of 71 participants (mean: 24, ranging from 13 to 37) were included in this meta-analysis: 36 patients received GMA, and 35 were in control groups. All the participants had ulcerative colitis in remission and were treated with Adacolumn® or Cellсорba®. One trial evaluated GMA vs sham control (24) and two trials assessed GMA compared to standard therapy alone (9, 25). Both GMA and sham control were added to conventional treatment. In terms of main outcome, the studies investigated the rate of clinical relapse.

Three studies also reported on the steroid-sparing effect of GMA (9, 17, 22).

### 5.3 Risk of bias assessment

A summary of risk of bias assessment is shown in **Supplementary Figure 1 and Supplementary Figure 2**. Three unblinded studies were at high risk of performance bias (19, 22, 25). Because of the nature of the intervention, four studies which lacked a description of the blinding process were interpreted as having a high risk of bias (18, 21, 23, 24). As regards assessment blinding, two unblinded studies were judged to be at high risk of bias (19, 25). Two studies were deemed as having a high risk of other bias; although they used ITT analysis, they considered subjects who left the study as a treatment failure that may lead to bias (7).

### 5.4 Efficacy and safety of GMA in clinical remission induction

Seven randomized and one minimized controlled trial evaluated clinical remission induction. GMA therapy was associated with a better clinical response rate compared to the control group (OR = 2.03, 95% CI = 1.36–3.01,  $p < 0.001$ ,  $I^2 = 8.4\%$ ) (**Supplementary Figure 3**). Subgroup analysis of studies with assessment at 12 weeks also showed benefit (OR = 1.67, 95% CI = 1.12–2.49,  $p = 0.012$ ,  $I^2 = 0.0\%$ ) (**Supplementary Figure 4**). Patients undergoing GMA therapy had a higher remission rate compared to standard therapy without GMA (OR = 1.93, 95% CI = 1.28–2.91,  $p = 0.002$ ,  $I^2 = 0.0\%$ ) (**Figure 2**). Sub-group analyses were performed based on activity indices and number of GMA cycles. No difference was found between the two groups in studies assessing UC with the Mayo score (OR = 1.34, 95% CI = 0.74–2.43,  $p = 0.334$ ,  $I^2 = 0.0\%$ ), but the remission induction was more successful in studies using CAI for assessment (OR = 2.70, 95% CI = 1.52–4.79,  $p = 0.001$ ,  $I^2 = 0.0\%$ ) (**Supplementary Figure 5**). A significant difference was found in studies using five cycles compared to the control (OR = 2.78, 95% CI = 1.17–6.60,  $p = 0.021$ ,  $I^2 = 0.0\%$ ) and more than five cycles compared to standard therapy alone (OR = 1.73, 95% CI = 1.08–2.77,  $p = 0.022$ ,  $I^2 = 0.0\%$ ). There was no statistically significant difference in the number of AEs ( $p = 0.135$ ) (**Supplementary Figure 6**). No statistically significant steroid-sparing effect was detected among patients with active UC ( $p = 0.080$ ). A list of reported AEs is presented in **Supplementary Table 1**.

### 5.5 Efficacy and safety of GMA in clinical remission maintenance

Three randomized clinical trials evaluated the clinical remission rate in remitting UC induced by GMA. Patients receiving GMA had a higher rate of clinical remission maintenance (OR = 8.34, 95% CI = 2.64–26.32,  $p < 0.001$ ,  $I^2 = 0.0\%$ ) (**Figure 3**). Due to lack of data, the rate of AEs could not be assessed in this population.

## 5.6 Trial Sequential Analysis

Based on a TSA, the cumulative Z curve crossed the trial sequential significance boundary as regards clinical remission induction and clinical remission maintenance (power=80.0%; alpha=5.0%) (**Supplementary Figure 7**). Moreover, clinical remission maintenance exceeded the required meta-analysis sample size, possibly suggesting that further clinical trials are not required. A TSA for AEs and steroid-sparing effects could not be carried out due to insufficient information size.

## 5.7 Quality of evidence

The GRADE analysis rated the quality of evidence for primary and secondary outcomes at a very low to low level. GRADE evidence profile is shown in **Supplementary Table 2**.

## 6 Discussion

The main goal of care is to achieve and maintain remission of UC. This condition is usually treated by a step-up approach, during which treatments are switched or additional treatment is administered to optimize current therapy. There are several therapeutic agents to slow down the clinical activity of UC. Corticosteroids, 5-aminosalicylates, immunosuppressive agents, and tumour necrosis alpha-inhibitors are commonly used, and new therapeutic targets, such as anti-adhesion molecules and anti-interleukins, are emerging. Despite these multiple therapeutic options, there is still a need to expand the scope of treatment methods due to possible development of intolerance or resistance to current treatments. After running out of treatment options, surgical therapy is frequently the last remaining option for patients. GMA is a novel non-pharmacologic treatment option for active and remitting UC, by which activated granulocytes and monocytes are removed from the circulation. These cells may contribute to the pathogenesis of UC.

Guidelines describing the role of GMA in UC are in agreement on the potential beneficial effect and favourable safety profile. They also agree that there is insufficient evidence in this field of practice (26, 27).

To our knowledge, the first report on the efficacy of GMA in UC was published in Japan in 2001 (28). This study found a considerably high remission rate with only five sessions of GMA in patients refractory to conventional drug therapy. Subsequent studies from the early 21<sup>st</sup> century had similar results (29-31). In 2008, Sands et al. failed to prove a significant difference in clinical remission rate between GMA and a placebo on a relatively large population (7). However, this study was not free of attrition bias; a high proportion of patients were lost to follow-up. Three systematic reviews and meta-analyses have been conducted in this field so far (32-34). All of them have agreed on the benefit of GMA in clinical remission induction, and they pointed out the necessity for more trials with a rigorous and clear design to further narrow the focus on specific patient groups. These studies used one to three databases for a systematic search and selection.

In our current meta-analysis, a broader literature search was carried out, and the role of GMA in clinical remission maintenance was assessed. Our work supported the hypothesis that GMA improves the rates of clinical response and clinical remission in patients with UC. It should be noted that response and remission rates defined by symptom scores should be cautiously interpreted because they also include subjective elements, such as overall physician judgement on disease activity. A few recent retrospective and prospective studies have suggested certain prognostic factors in the therapeutic response (35-37). It seems that younger patients respond better to GMA therapy, whereas gender and smoking status showed no difference in response to treatment (35). Yokoyama et al. found that shorter duration of UC and lower cumulative corticosteroid dose are associated with a higher efficacy rate

(36). In their study, patients who received GMA treatment immediately after relapse were the best responders. It would be advisable to conduct further research to identify subgroups of UC where patients benefit the most from GMA (38).

In the eligible studies, clinical remission induction was achieved in 29.8% without adjunctive GMA therapy. Based on our analysis, addition of GMA may be more effective for induction of remission in UC compared to conventional therapy alone (very low certainty). This result (OR = 1.93, 95% CI = 1.28–2.91,  $p=0.002$ ,  $I^2 = 0.0\%$ ) implies that patients receiving GMA have higher odds of achieving clinical remission by between 28 and 191%. To date, there is no uniformly accepted GMA regimen. There are RCTs to compare a ten-cycle and a five-cycle GMA regimen. Dignass et al. and Ricart et al. found similar remission rates between ten and five cycles (46% vs. 36%,  $p=0.479$ ; 35.7% vs 45.5%,  $p>0.05$ , respectively) (38, 39). The latter study also showed a steroid-sparing effect in the group receiving ten cycles of GMA. Sakuraba et al. found that an improved remission rate is associated with intensive GMA (54.0% vs 71.2%,  $p=0.029$  in five- and ten-cycle regimens, respectively) (40). In our meta-analysis, the number of GMA cycles varied among studies as well. We assessed the efficacy of GMA based on the two main regimens in previous trials. Both groups showed a benefit of adding GMA to the therapy compared to standard treatment alone.

Regarding the induction and maintenance of remission, our results relate to clinical remission. In 2015, based on insights from various clinical trials, a new consensus was made on appropriate evidence-based treatment targets (41). From then on, in addition to controlling symptoms, more objective markers came to the fore and endoscopic remission came to the spotlight. Only three of the articles analysed reported a comparison of endoscopic remission. Nakamura et al. found that the improvement in endoscopic score was significantly higher in the group receiving GMA as well (23). Another study showed that the Rachmilewitz's endoscopic index was significantly improved in patients treated with GMA compared to the control group (17). The third study reported similar endoscopic remission rate in the two groups (12% vs 11% in GMA and sham group, respectively;  $p=1.00$ ) (7). Data on objective inflammatory markers are also contradictory and insufficient (18, 20, 25). In light of this, there is a need for additional, high-quality RCTs that focus on current therapeutic targets.

We found no significant difference between the two groups as regards AEs (very low certainty). Further studies are called for to provide a higher level of evidence on this topic. They would be particularly important for specific subgroups where the safety profile is of paramount importance, such as in cytomegalovirus infection, adolescence, and pregnancy. Clinical trials should also target these populations because fewer therapeutic options are available for them and the safety profile of GMA seems favourable compared to other treatments.

As with any therapeutic option, cost-effectiveness should also be considered. The cost of GMA is much higher compared to regular medication, such as corticosteroids, but GMA could be cost-effective in the long term. The use of GMA may reduce the cost of medical services, hospitalization, and surgery in the long term. Nevertheless, GMA's safety profile is in sharp contrast to multiple severe AEs associated with conventional pharmacologics and biologics. According to recommendations, if UC flares up, treatment is usually escalated to biologics. As GMA and biologics are also likely to differ in terms of invasiveness, safety, and efficacy, the question arises: which one may be more beneficial? However, there is currently no evidence of this. In this regard, limited data are available from recent studies suggesting that GMA may be beneficial in patients who no longer respond to biologics (42–44).

To our knowledge, this is the first meta-analysis to assess the role of GMA in UC remission maintenance. Our study showed that the addition of GMA enhances the proportion of patients who can maintain their remission (low certainty). Fukunaga et al. and Emmrich et al. enrolled clinically active



1  
2 304 UC patients based on CAI (9, 24). After successful induction therapy with the inclusion of GMA,  
3 305 patients achieving clinical remission were allocated to groups with and without GMA treatment for  
4 306 remission maintenance. Maiden et al. enrolled UC patients with a high level of faecal calprotectin,  
5 307 which is considered as a risk factor of relapse (25). Their results showed that faecal calprotectin level  
6 308 significantly decreases following five treatment session. This study differs from the previous two in  
7 309 the fact that they enrolled an asymptomatic population regardless of how patients achieved remission.  
8 310 The two studies recruiting patients with active UC detected no statistically significant difference  
9 311 between study arms in time to first relapse; however, it must be noted that in one of these studies, all  
10 312 the patients became steroid-free in the GMA group (9). Maiden et al. found that time to first relapse  
11 313 was significantly higher in patients receiving GMA ( $99\pm 73$  days vs.  $161\pm 44$  days,  $p=0.0004$ ). Despite  
12 314 our very promising results, these findings are limited by the amount of available data. More randomized  
13 315 controlled trials are necessary in this area to strengthen our results. This study has some potential  
14 316 limitations. Allowed concomitant therapies have differed among included studies; therefore, our  
15 317 estimates may have been subject to bias, as reflected by the grade of evidence (**Supplementary Table**  
16 318 **2**). Moreover, our funnel plots showed symmetry by visual assessment, but publication bias still cannot  
17 319 be ruled out because of the low number of included studies. Side-effects and safety data were not  
18 320 uniformly reported in most of the publications under analysis, according to the International  
19 321 Conference on Harmonisation-Good Clinical Practice (ICH-GCP) guidelines (15). Therefore, our  
20 322 second main objective, the safety assessment of GMA, was only achieved to a limited extent.  
21 323 Furthermore, this result is strongly limited by the high heterogeneity of studies. The most likely source  
22 324 of this is the heterogeneous nature of concomitant treatment. All in all, GMA seems to be a reasonable  
23 325 therapeutic option, but finding its exact place to treat UC demands further research. A particularly  
24 326 promising area could be remission maintenance.

## 29 327 **6.1 Conclusion**

31 328 Implications for practice: The results support the hypothesis that patients with active UC have a  
32 329 better chance of clinical remission if GMA is administered as an adjunctive therapy. As regards the  
33 330 frequency of AEs, we found no statistically significant difference between the two groups. With  
34 331 regard to remission maintenance, GMA was identified as an effective alternative therapeutic option.

35 332 Implications for research: Further studies are required to select patients who may benefit the most  
36 333 from GMA therapy. Nevertheless, more randomized controlled studies are necessary to justify its  
37 334 role in remission induction. There is currently evidence available about induction and maintenance of  
38 335 clinical remission; however, the role of GMA concerning endoscopic and histological remission is  
39 336 currently unclear. If GMA is proven to be safe and effective, cost-effectiveness studies will also be  
40 337 worthwhile in the future.

## 45 338 **7 Data availability statement**

46  
47 339 The data that support the findings of this study are available from the corresponding author, [A.H.],  
48 340 upon reasonable request.

## 50 341 **8 Patient and Public Involvement**

51  
52 342 It was not appropriate or possible to involve patients or the public in the design, or conduct, or  
53 343 reporting, or dissemination plans of our research.

## 344 9 Author contributions

345 All authors meet the International Committee of Medical Journal Editors (ICMJE) criteria for  
346 authorship. All authors agree to be accountable for all aspects of the work in ensuring that questions  
347 related to the accuracy or integrity of any part of the work are appropriately investigated and  
348 resolved. All authors read and approved the final manuscript.

349 S.K.: drafting the manuscript, selection of studies, data extraction, risk of bias assessment; D.N.:  
350 statistical analysis, preparation of the standardized data collection sheet, drafting the manuscript;  
351 P.H.: substantial contribution in study design, critical revision of the content; M.F.: selection of  
352 studies, data extraction, risk of bias assessment, drafting the manuscript; Z.S.: participation in the  
353 design of the study and its coordination, critical revision of the manuscript; B.E.: provided revisions  
354 to the scientific content of the manuscript, substantial contribution in design of the work; B.T.:  
355 substantial contribution in study design, drafting the manuscript; P.J.H.: preparation of the  
356 standardized data collection sheet, stylistic and grammatical revision of the manuscript, substantial  
357 contribution in study design; P.S.: expert in the field of gastroenterology, substantial contribution in  
358 study design and interpretation of data, preparation of study protocol and the first draft of the  
359 manuscript; A.H.: expert in the field of haematology, substantial contribution in study design and  
360 interpretation of data, preparation of study protocol and the first draft of the manuscript

## 361 10 Funding

362 This research was not a company-initiated study. All costs were covered by the Economic  
363 Development and Innovation Operative Programme Grant (GINOP 2.3.2-15-2016-00048), the Grant  
364 of the Hungarian Science Foundation (FK 132834), and by Human Resources Development  
365 Operational Programme Grants (EFOP-3.6.2-16-2017-00006). Sponsors were not involved in the  
366 design, data collection, analysis, interpretation, or preparation of the manuscript.

## 367 11 Conflict of interest

368 Authors do not have any conflicts of interest to declare.

## 369 12 Compliance with Ethical Standards

370 This study was prepared in accordance with the Committee on Publication Ethics (COPE) guidelines  
371 to respect third parties rights such as copyright and/or moral rights. Ethical approval was not required  
372 to conduct this project as data is not individualized and primary data was not collected.

## 373 13 Abbreviations

374 AE, adverse events; clinical activity index, CAI; confidence interval, CI; granulocyte and monocyte  
375 apheresis, GMA; inflammatory bowel disease, IBD; OR, odds ratio; RCT, randomized controlled  
376 trial; TSA, trial sequential analysis; UC, ulcerative colitis; weighted mean difference, WMD.

## 377 14 References

- 378 1. Ordás I, Eckmann L, Talamini M, Baumgart DC, Sandborn WJ. Ulcerative colitis. The  
379 Lancet. 2012;380(9853):1606-19.
- 380 2. Ungaro R, Mehandru S, Allen PB, Peyrin-Biroulet L, Colombel J-F. Ulcerative colitis. The  
381 Lancet. 2017;389(10080):1756-70.

- 1  
2 382 3. Saniabadi AR, Tanaka T, Ohmori T, Sawada K, Yamamoto T, Hanai H. Treating  
3 383 inflammatory bowel disease by adsorptive leucocytapheresis: a desire to treat without drugs. *World J*  
4 384 *Gastroenterol.* 2014;20(29):9699-715.  
5
- 6 385 4. Matsumoto T, Fukunaga K, Kamikozuru K, Tozawa K, Yokoyama Y, Kusaka T, et al.  
7 386 Cytapheresis as a Non-Pharmacological Therapy for Inflammatory Bowel Disease. *Transfus Med*  
8 387 *Hemother.* 2008;35(1):18-23.  
9
- 10 388 5. Yamamoto T. The role of granulocyte and monocyte apheresis in inflammatory bowel  
11 389 disease. *J Crohns Colitis.* 2013;7(3):e114.
- 12  
13 390 6. Yamamoto T, Umegae S, Matsumoto K. Long-term clinical impact of early introduction of  
14 391 granulocyte and monocyte adsorptive apheresis in new onset, moderately active, extensive ulcerative  
15 392 colitis. *J Crohns Colitis.* 2012;6(7):750-5.
- 16  
17 393 7. Sands BE, Sandborn WJ, Feagan B, Lofberg R, Hibi T, Wang T, et al. A randomized, double-  
18 394 blind, sham-controlled study of granulocyte/monocyte apheresis for active ulcerative colitis.  
19 395 *Gastroenterology.* 2008;135(2):400-9.
- 20  
21 396 8. Bresci G, Parisi G, Mazzoni A, Scatena F, Capria A. Treatment of patients with acute  
22 397 ulcerative colitis: conventional corticosteroid therapy (MP) versus granulocytapheresis (GMA): a  
23 398 pilot study. *Dig Liver Dis.* 2007;39(5):430-4.
- 24  
25 399 9. Fukunaga K, Yokoyama Y, Kamokozuru K, Nagase K, Nakamura S, Miwa H, et al.  
26 400 Adsorptive granulocyte/monocyte apheresis for the maintenance of remission in patients with  
27 401 ulcerative colitis: a prospective randomized, double blind, sham-controlled clinical trial. *Gut Liver.*  
28 402 2012;6(4):427-33.
- 29  
30 403 10. Moher D, Liberati A, Tetzlaff J, Altman DG, Group P. Preferred reporting items for  
31 404 systematic reviews and meta-analyses: the PRISMA statement. *PLoS Med.* 2009;6(7):e1000097.
- 32  
33 405 11. Hoboken. *Cochrane Handbook for Systematic Reviews of Interventions*: Wiley; 2008.
- 34 406 12. Higgins JP, Altman DG, Gotzsche PC, Juni P, Moher D, Oxman AD, et al. The Cochrane  
35 407 Collaboration's tool for assessing risk of bias in randomised trials. *BMJ.* 2011;343:d5928.
- 36  
37 408 13. Cochran WG. The Combination of Estimates from Different Experiment. *Biometrics.*  
38 409 1954;10:101-29.
- 39  
40 410 14. Julian P T Higgins SGT, Jonathan J Deeks, Douglas G Altman. Measuring inconsistency in  
41 411 meta-analyses. *British Medical Journal.* 2003;327:557-60.
- 42  
43 412 15. Bhatt A. International Council for Harmonisation E6(R2) addendum: Challenges of  
44 413 implementation. *Perspectives in Clinical Research.* 2017;8(4):162-6.
- 45 414 16. Schünemann H, Brożek J, Guyatt G, A O. *GRADE handbook for grading quality of evidence*  
46 415 *and strength of recommendations: The GRADE Working Group, 2013; 2013.*
- 47  
48 416 17. Sawada K, Kusugami K, Suzuki Y, Bamba T, Munakata A, Hibi T, et al. Leukocytapheresis  
49 417 in ulcerative colitis: results of a multicenter double-blind prospective case-control study with sham  
50 418 apheresis as placebo treatment. *Am J Gastroenterol.* 2005;100(6):1362-9.
- 51  
52 419 18. Bresci G, Parisi G, Mazzoni A, Scatena F, Capria A. Granulocytapheresis versus  
53 420 methylprednisolone in patients with acute ulcerative colitis: 12-month follow up. *J Gastroenterol*  
54 421 *Hepatol.* 2008;23(11):1678-82.  
55  
56  
57  
58  
59  
60

19. Domenech E, Panes J, Hinojosa J, Annese V, Magro F, Sturniolo GC, et al. Addition of Granulocyte/Monocyte Apheresis to Oral Prednisone for Steroid-dependent Ulcerative Colitis: A Randomized Multicentre Clinical Trial. *J Crohns Colitis*. 2018;12(6):687-94.
20. Eberhardson M, Karlen P, Linton L, Jones P, Lindberg A, Kostalla MJ, et al. Randomised, Double-blind, Placebo-controlled Trial of CCR9-targeted Leukapheresis Treatment of Ulcerative Colitis Patients. *J Crohns Colitis*. 2017;11(5):534-42.
21. Hanai H, Iida T, Takeuchi K, Watanabe F, Maruyama Y, Kageoka M, et al. Intensive granulocyte and monocyte adsorption versus intravenous prednisolone in patients with severe ulcerative colitis: an unblinded randomised multi-centre controlled study. *Dig Liver Dis*. 2008;40(6):433-40.
22. Hanai H, Watanabe F, Yamada M, Sato Y, Takeuchi K, Iida T, et al. Adsorptive granulocyte and monocyte apheresis versus prednisolone in patients with corticosteroid-dependent moderately severe ulcerative colitis. *Digestion*. 2004;70(1):36-44.
23. Nakamura T, Kawagoe Y, Matsuda T, Ueda A, Ueda Y, Takahashi Y, et al. Effect of granulocyte and monocyte adsorption apheresis on urinary albumin excretion and plasma endothelin-1 concentration in patients with active ulcerative colitis. *Blood Purif*. 2004;22(6):499-504.
24. Emmrich J, Petermann S, Nowak D, Beutner I, Brock P, Klingel R, et al. Leukocytapheresis (LCAP) in the management of chronic active ulcerative colitis--results of a randomized pilot trial. *Dig Dis Sci*. 2007;52(9):2044-53.
25. Maiden L, Takeuchi K, Baur R, Bjarnason I, O'Donohue J, Forgacs I, et al. Selective white cell apheresis reduces relapse rates in patients with IBD at significant risk of clinical relapse. *Inflamm Bowel Dis*. 2008;14(10):1413-8.
26. Leukapheresis for inflammatory bowel disease: Interventional procedures guidance 2005 [Available from: <https://www.nice.org.uk/guidance/ipg126>].
27. Matsuoka K, Kobayashi T, Ueno F, Matsui T, Hirai F, Inoue N, et al. Evidence-based clinical practice guidelines for inflammatory bowel disease. *J Gastroenterol*. 2018;53(3):305-53.
28. Shimoyama T, Kimura K, Hiwatashi N, Matsueda K, Munakata A, Asakura H, et al. Safety and Efficacy of Granulocyte and Monocyte Adsorption Apheresis in Patients With Active Ulcerative Colitis: A Multicenter Study. *Journal of Clinical Apheresis*. 2001;16:1-9.
29. Kanke K, Nakano M, Hiraishi H, Terano A. Clinical evaluation of granulocyte/monocyte apheresis therapy for active ulcerative colitis. *Dig Liver Dis*. 2004;36(12):811-7.
30. Kim HJ, Kim JS, Han DS, Yang SK, Hahm KB, Lee WI, et al. [Granulocyte and monocyte adsorption apheresis in Korean conventional treatment-refractory patients with active ulcerative colitis: a prospective open-label multicenter study]. *The Korean journal of gastroenterology = Taehan Sohwagi Hakhoe chi*. 2005;45(1):34-44.
31. Shimoyama T, Sawada K, Hiwatashi N, Sawada T, Matsueda K, Munakata A, et al. Safety and efficacy of granulocyte and monocyte adsorption apheresis in patients with active ulcerative colitis: a multicenter study. *J Clin Apher*. 2001;16(1):1-9.
32. Habermalz B, Sauerland S. Clinical effectiveness of selective granulocyte, monocyte adsorptive apheresis with the Adacolumn device in ulcerative colitis. *Dig Dis Sci*. 2010;55(5):1421-8.
33. Thanaraj S, Hamlin PJ, Ford AC. Systematic review: granulocyte/monocyte adsorptive apheresis for ulcerative colitis. *Aliment Pharmacol Ther*. 2010;32(11-12):1297-306.

- 1  
2 465 34. Yoshino T, Nakase H, Minami N, Yamada S, Matsuura M, Yazumi S, et al. Efficacy and  
3 466 safety of granulocyte and monocyte adsorption apheresis for ulcerative colitis: a meta-analysis. *Dig*  
4 467 *Liver Dis.* 2014;46(3):219-26.  
5  
6 468 35. Imperiali G, Amato A, Terpin MM, Beverina I, Bortoli A, Devani M, et al. Granulocyte-  
7 469 Monocyte Apheresis in Steroid-Dependent, Azathioprine-Intolerant/Resistant Moderate Ulcerative  
8 470 Colitis: A Prospective Multicenter Study. *Gastroenterol Res Pract.* 2017;2017:9728324.  
9  
10 471 36. Yokoyama Y, Kawai M, Fukunaga K, Kamikozuru K, Nagase K, Nogami K, et al. Looking  
11 472 for predictive factors of clinical response to adsorptive granulocyte and monocyte apheresis in  
12 473 patients with ulcerative colitis: markers of response to GMA. *BMC Gastroenterology.* 2013;13(27).  
13  
14 474 37. Tanaka T, Sugiyama S, Goishi H, Kajihara T, Akagi M, Miura T. Treatment of children and  
15 475 adolescents with ulcerative colitis by adsorptive depletion of myeloid lineage leucocytes as  
16 476 monotherapy or in combination with low dose prednisolone after failure of first-line medications.  
17 477 *BMC Gastroenterology.* 2013;13(130).  
18  
19 478 38. Dignass AU, Eriksson A, Kilander A, Pukitis A, Rhodes JM, Vavricka S. Clinical trial: five  
20 479 or ten cycles of granulocyte-monocyte apheresis show equivalent efficacy and safety in ulcerative  
21 480 colitis. *Aliment Pharmacol Ther.* 2010;31(12):1286-95.  
22  
23 481 39. Ricart E, Esteve M, Andreu M, Casellas F, Monfort D, Sans M, et al. Evaluation of 5 versus  
24 482 10 granulocyteapheresis sessions in steroid-dependent ulcerative colitis: A pilot, prospective,  
25 483 multicenter, randomized study. *World Journal of Gastroenterology.* 2007;13(15):2193-7.  
26  
27 484 40. Sakuraba A, Motoya S, Watanabe K, Nishishita M, Kanke K, Matsui T, et al. An open-label  
28 485 prospective randomized multicenter study shows very rapid remission of ulcerative colitis by  
29 486 intensive granulocyte and monocyte adsorptive apheresis as compared with routine weekly treatment.  
30 487 *Am J Gastroenterol.* 2009;104(12):2990-5.  
31  
32 488 41. Peyrin-Biroulet L, Sandborn W, Sands BE, Reinisch W, Bemelman W, Bryant RV, et al.  
33 489 Selecting Therapeutic Targets in Inflammatory Bowel Disease (STRIDE): Determining Therapeutic  
34 490 Goals for Treat-to-Target. *Am J Gastroenterol.* 2015;110(9):1324-38.  
35  
36 491 42. Yokoyama Y, Sawada K, Aoyama N, Yoshimura N, Sako M, Hirai F, et al. Efficacy of  
37 492 Granulocyte and Monocyte Adsorptive Apheresis in Patients With Inflammatory Bowel Disease  
38 493 Showing Lost Response to Infliximab. *J Crohns Colitis.* 2020;14(9):1264-73.  
39  
40 494 43. Nakamura M, Yamamura T, Maeda K, Sawada T, Mizutani Y, Ishikawa E, et al. Refractory  
41 495 Ulcerative Colitis Improved by Scheduled Combination Therapy of Vedolizumab and Granulocyte  
42 496 and Monocyte Adsorptive Apheresis. *Internal medicine (Tokyo, Japan).* 2020;59(23):3009-14.  
43  
44 497 44. Rodríguez-Lago I, Sempere L, Gutiérrez A, Núñez A, Leo Carnerero E, Hinojosa E, et al.  
45 498 Granulocyte-monocyte apheresis: an alternative combination therapy after loss of response to anti-  
46 499 TNF agents in ulcerative colitis. *Scandinavian journal of gastroenterology.* 2019;54(4):459-64.  
47

## 48 500 15 Figures and tables

49  
50 501 **Figure 1:** PRISMA flow chart representing the process of the study search and selection

51  
52 502 **Figure 2:** Forest plot of studies comparing clinical remission induction between patients with and  
53 503 without GMA as adjunctive therapy. Black diamonds represent the individual studies effect and  
54 504 vertical lines show the corresponding 95% confidence intervals. Size of the grey squares reflect on  
55 505 the weight of a particular study. The blue diamond the overall or summary effect. The outer edges of  
56 506 the diamonds represent the CIs.  
57  
58  
59  
60

**Figure 3:** Forest plot of studies comparing clinical remission maintenance between patients with and without GMA as adjunctive therapy. Black diamonds represent the individual studies effect and vertical lines show the corresponding 95% confidence intervals. Size of the grey squares reflect on the weight of a particular study. The blue diamond the overall or summary effect. The outer edges of the diamonds represent the CIs.

**Table 1:** Characteristics of included studies

**Supplementary Figure 1:** Risk of bias assessment on study level in studies comparing patients with and without GMA as an adjunctive therapy

**Supplementary Figure 2:** Risk of bias assessment across studies comparing patients with and without GMA as an adjunctive therapy

**Supplementary Figure 3:** Forest plot of studies comparing clinical remission induction or clinical improvement between patients with and without GMA as adjunctive therapy. Black diamonds represent the individual studies effect and vertical lines show the corresponding 95% confidence intervals (8). Size of the grey squares reflect on the weight of a particular study. The blue diamond the overall or summary effect. The outer edges of the diamonds represent the CIs.

**Supplementary Figure 4:** Subgroup analysis of studies comparing clinical remission induction or clinical improvement after 12 weeks between patients with and without GMA as adjunctive therapy. Black diamonds represent the individual studies effect and vertical lines show the corresponding 95% confidence intervals (8). Size of the grey squares reflect on the weight of a particular study. The blue diamond the overall or summary effect. The outer edges of the diamonds represent the CIs.

**Supplementary Figure 5:** Subgroup analysis based on criteria of remission in studies comparing clinical remission induction between patients with and without GMA as adjunctive therapy. Black diamonds represent the individual studies effect and vertical lines show the corresponding 95% confidence intervals. Size of the grey squares reflect on the weight of a particular study. The blue diamond the overall or summary effect. The outer edges of the diamonds represent the CIs.

**Supplementary Figure 6:** Forest plot of studies comparing frequency of adverse events between patients with and without GMA as adjunctive therapy. Black diamonds represent the individual studies effect and vertical lines show the corresponding 95% confidence intervals. Size of the grey squares reflect on the weight of a particular study. The blue diamond the overall or summary effect. The outer edges of the diamonds represent the CIs.

**Supplementary Figure 7:** Results of Trial Sequential Analysis. A: clinical remission induction, B: clinical remission maintenance, C: Clinical remission induction based on remission criteria, D: Clinical remission induction or clinical improvement

**Supplementary Table 1:** List of reported adverse events.

**Supplementary Table 2:** Certainty of evidence by GRADE approach

**Table 1: Characteristics of included studies**

\* All patients received standard of care added to investigator/comparator. 1: one patient was excluded from analysis because of protocol deviations; 2: one patient was excluded from analysis because of protocol deviations; 3: one patient was excluded due to failure to return blood from the column; 4: minimization may be implemented without a random element, and this is considered to be equivalent to being random. Abbreviations: GMA=granulocyte/monocyte apheresis; n= number; CAI=Clinical Activity Index; EI=Endoscopic Index; 5-ASA=5-aminosalicylic acid; AZA=azathioprine; 6-MP=6-mercaptopurine;

| Clinical remission induction         |                              |                |                                         |                             |    |                              |    |                    |                            |                                                      |                                                                                    |
|--------------------------------------|------------------------------|----------------|-----------------------------------------|-----------------------------|----|------------------------------|----|--------------------|----------------------------|------------------------------------------------------|------------------------------------------------------------------------------------|
| Study Name and Setting               | N <sup>o</sup> of cycles (n) | Randomization* | N <sup>o</sup> of patients analyzed (n) | Patients achieving response |    | Patients achieving remission |    | Time of assessment | Outcome criteria           |                                                      | Concomitant medication                                                             |
|                                      |                              |                |                                         | %                           | n  | %                            | n  |                    | Remission                  | Response                                             |                                                                                    |
| Bresci 2008 single center study      | 5                            | GMA            | 40                                      | 92.5                        | 37 | 72.5                         | 29 | 5 weeks            | CAI<6; EI<4                | CAI<6; EI>4                                          | oral 5-ASA                                                                         |
|                                      |                              | steroid        | 40                                      | 65.0                        | 26 | 50.0                         | 20 |                    |                            |                                                      |                                                                                    |
| Doménech 2018 multi-center study     | 7                            | GMA+steroid    | 62 <sup>1</sup>                         | 58.1                        | 36 | 19.4                         | 12 | 12 weeks           | Mayo ≤2 and no steroid use | Mayo score decrease ≥3 or at least 30% from baseline | stable dose AZA and steroid were allowed if started before randomization           |
|                                      |                              | steroid        | 61 <sup>2</sup>                         | 49.2                        | 30 | 18.0                         | 11 |                    |                            |                                                      |                                                                                    |
| Eberhardson 2017 single center study | 5                            | GMA            | 14                                      | 57.1                        | 8  | 35.7                         | 5  | 12 days            | Mayo score ≤3              | Mayo score decrease ≥3 or at least 30% from baseline | stable dose of steroid; 5-ASA and/or thiopurines were allowed                      |
|                                      |                              | sham           | 8 <sup>3</sup>                          | 37.5                        | 3  | 12.5                         | 1  |                    |                            |                                                      |                                                                                    |
| Hanai 2004 single center study       | 7                            | GMA            | 46                                      | 93.5                        | 43 | 82.6                         | 38 | 12 weeks           | CAI≤4                      | CAI had fallen, but still 4<                         | steroids and/or 5-ASA                                                              |
|                                      |                              | steroid        | 23                                      | 78.3                        | 18 | 65.2                         | 15 |                    |                            |                                                      |                                                                                    |
| Hanai 2008 multi-center study        | 11                           | GMA            | 35                                      | 80.0                        | 28 | 74.3                         | 26 | 12 weeks           | CAI≤4                      | CAI decreased by ≥5 points, but remained ≥5          | all patients were on salicylates and the majority were on low dose steroid as well |
|                                      |                              | steroid        | 35                                      | 62.9                        | 22 | 48.6                         | 17 |                    |                            |                                                      |                                                                                    |

|                                             |    |        |     |      |     |      |    |          |                                            |                                                    |                                                                  |
|---------------------------------------------|----|--------|-----|------|-----|------|----|----------|--------------------------------------------|----------------------------------------------------|------------------------------------------------------------------|
| Nakamura 2004 single center study           | 5  | GMA    | 10  | N/A  | N/A | 80.0 | 8  | 6 weeks  | based on CAI, but not specified            | all patients received steroid; 5-ASA was unchanged |                                                                  |
|                                             |    | no GMA | 10  | N/A  | N/A | 20.0 | 2  |          |                                            |                                                    |                                                                  |
| Sands 2008 A study multi-center study       | 10 | GMA    | 31  | 67.7 | 21  | 16.1 | 5  | 12 weeks | Mayo score $\leq 2$ ; 0-1 endoscopic score | Mayo score decrease $\geq 3$                       | one or more of the following: 5-ASA agents, steroid, 6-MP or AZA |
|                                             |    | sham   | 16  | 62.5 | 10  | 18.8 | 3  |          |                                            |                                                    |                                                                  |
| Sands 2008 B study multi-center study       | 10 | GMA    | 112 | 60.7 | 68  | 17.0 | 19 | 12 weeks | Mayo score $\leq 2$ ; 0-1 endoscopic score | Mayo score decrease $\geq 3$                       | one or more of the following: 5-ASA, steroid, 6-MP or AZA        |
|                                             |    | sham   | 56  | 50.0 | 28  | 10.7 | 6  |          |                                            |                                                    |                                                                  |
| Sawada 2005 <sup>4</sup> multi-center study | 7  | GMA    | 10  | 80.0 | 8   | 20.0 | 2  | 10 weeks | CAI=0                                      | CAI improved $>3$                                  | except for steroid, other medications remained unchanged         |
|                                             |    | sham   | 9   | 33.3 | 3   | 11.1 | 1  |          |                                            |                                                    |                                                                  |

**Clinical remission maintenance**

| Study Name                        | Number of cycles (n) | Randomization | Number of patients analyzed (n) | Number of patients in clinical remission at the end of the study |    | Close-out examination | Outcome criteria for remission | Concomitant medication                                                                    |
|-----------------------------------|----------------------|---------------|---------------------------------|------------------------------------------------------------------|----|-----------------------|--------------------------------|-------------------------------------------------------------------------------------------|
|                                   |                      |               |                                 | %                                                                | n  |                       |                                |                                                                                           |
| Emmrich 2006 single center study  | 5                    | GMA           | 8                               | 62.5                                                             | 5  | 6 months              | CAI $\leq 4$                   | all patients were on steroid; 5-ASA was allowed; AZA given at baseline remained unchanged |
|                                   |                      | no GMA        | 5                               | 20.0                                                             | 1  |                       |                                |                                                                                           |
| Fukunaga 2012 single center study | 12                   | GMA           | 10                              | 40.0                                                             | 4  | 12 months             | CAI $\leq 4$                   | stable dose of AZA and steroids were allowed if started before randomization              |
|                                   |                      | sham          | 11                              | 9.1                                                              | 1  |                       |                                |                                                                                           |
| Maiden 2008 single center study   | 5                    | GMA           | 18                              | 77.8                                                             | 14 | 6 months              | CAI $\leq 6$                   | only 5-ASA or oral steroid                                                                |
|                                   |                      | no GMA        | 19                              | 26.3                                                             | 5  |                       |                                |                                                                                           |





From: Moher D, Liberati A, Tetzlaff J, Altman DG, The PRISMA Group (2009). Preferred Reporting Items for Systematic Reviews and Meta-Analyses: The PRISMA Statement. PLoS Med 6(7): e1000097. doi:10.1371/journal.pmed1000097

For more information, visit [www.prisma-statement.org](http://www.prisma-statement.org).

**Figure 1:** PRISMA flow chart representing the process of the study search and selection

190x275mm (300 x 300 DPI)



**Figure 2:** Forest plot of studies comparing clinical remission induction between patients with and without GMA as adjunctive therapy. Black diamonds represent the individual studies effect and vertical lines show the corresponding 95% confidence intervals (CI). Size of the grey squares reflect on the weight of a particular study. The blue diamond the overall or summary effect. The outer edges of the diamonds represent the CIs.

272x186mm (600 x 600 DPI)



**Figure 3:** Forest plot of studies comparing clinical remission maintenance between patients with and without GMA as adjunctive therapy. Black diamonds represent the individual studies effect and vertical lines show the corresponding 95% confidence intervals (CI). Size of the grey squares reflect on the weight of a particular study. The blue diamond the overall or summary effect. The outer edges of the diamonds represent the CIs.

137x87mm (600 x 600 DPI)

## Supplementary material

### Granulocyte and monocyte apheresis as an adjunctive therapy to induce and maintain clinical remission in ulcerative colitis: A systematic review and meta-analysis

Szabolcs Kiss<sup>1,2</sup>, Dávid Németh<sup>2</sup>, Péter Hegyi<sup>2,3</sup>, Mária Földi<sup>1,2</sup>, Zsolt Szakács<sup>2,3</sup>, Bálint Erőss<sup>2,3</sup>, Benedek Tinusz<sup>4</sup>, Péter Jenő Hegyi<sup>2,5</sup>, Patrícia Sarlós<sup>2,5</sup>, Hussain Alizadeh<sup>1,6\*</sup>

<sup>1</sup>Doctoral School of Clinical Medicine, University of Szeged, Szeged, Hungary

<sup>2</sup>Institute for Translational Medicine, Medical School, University of Pécs, Pécs, Hungary

<sup>3</sup>János Szentágothai Research Centre, University of Pécs, Pécs, Hungary

<sup>4</sup>First Department of Medicine, Medical School, University of Pécs, Pécs, Hungary

<sup>5</sup>Division of Gastroenterology, First Department of Medicine, Medical School, University of Pécs, Pécs, Hungary

<sup>6</sup>Division of Haematology, First Department of Medicine, Medical School, University of Pécs, Pécs, Hungary

**\* Correspondence:**

Alizadeh Hussain M.D., Ph.D., Address: First Department of Medicine, University of Pécs Medical School, H-7624 Pécs, Ifjúság útja 13., Hungary; Tel: +(36-30) 643-6099

E-mail: alizadeh.hussain@pte.hu

Keywords: Inflammatory bowel disease

## Search strategy for MEDLINE database

Date of search: 5<sup>th</sup> March, 2019

Full query: (gma OR apheresis OR adsorption OR "cell separation" OR leukapher\* OR leukopher\* OR leukocytapher\* OR leukocytopher\* OR lymphapher\* OR lymphopher\* OR lymphocytopher\* OR lymphocytapher\*) AND ("inflammatory bowel disease" OR "ulcerative colitis") AND (random\*)

No filters or restrictions were applied.

| Search | Query                                                                                                                                                                                   | Automatic explosion                                                                                                                                                                                                                                                                                                                                                                                                                                                                                                                                                                                                                                                                                                                                                                                                                                             |
|--------|-----------------------------------------------------------------------------------------------------------------------------------------------------------------------------------------|-----------------------------------------------------------------------------------------------------------------------------------------------------------------------------------------------------------------------------------------------------------------------------------------------------------------------------------------------------------------------------------------------------------------------------------------------------------------------------------------------------------------------------------------------------------------------------------------------------------------------------------------------------------------------------------------------------------------------------------------------------------------------------------------------------------------------------------------------------------------|
| #1     | gma OR apheresis OR adsorption OR "cell separation" OR leukapher* OR leukopher* OR leukocytapher* OR leukocytopher* OR lymphapher* OR lymphopher* OR lymphocytopher* OR lymphocytapher* | ("gma"[All Fields] OR ("blood component removal"[MeSH Terms] OR ("blood"[All Fields] AND "component"[All Fields] AND "removal"[All Fields]) OR "blood component removal"[All Fields] OR "apheresis"[All Fields]) OR ("adsorption"[MeSH Terms] OR "adsorption"[All Fields] OR "adsorptions"[All Fields] OR "adsorptive"[All Fields] OR "adsorptively"[All Fields] OR "adsorptives"[All Fields] OR "adsorptivities"[All Fields] OR "adsorptivity"[All Fields]) OR "cell separation"[All Fields] OR "leukapher*"[All Fields] OR "leukopher*"[All Fields] OR "leukocytapher*"[All Fields] OR "leukocytopher*"[All Fields] OR "lymphapher*"[All Fields] OR "lymphopher*"[All Fields] OR "lymphocytopher*"[All Fields] OR "lymphocytapher*"[All Fields])                                                                                                              |
| #2     | "inflammatory bowel disease" OR "ulcerative colitis"                                                                                                                                    | "inflammatory bowel disease"[All Fields] OR "ulcerative colitis"[All Fields]                                                                                                                                                                                                                                                                                                                                                                                                                                                                                                                                                                                                                                                                                                                                                                                    |
| #3     | random*                                                                                                                                                                                 | "random*"[All Fields]                                                                                                                                                                                                                                                                                                                                                                                                                                                                                                                                                                                                                                                                                                                                                                                                                                           |
| #4     | #1 AND #2                                                                                                                                                                               | ("gma"[All Fields] OR ("blood component removal"[MeSH Terms] OR ("blood"[All Fields] AND "component"[All Fields] AND "removal"[All Fields]) OR "blood component removal"[All Fields] OR "apheresis"[All Fields]) OR ("adsorption"[MeSH Terms] OR "adsorption"[All Fields] OR "adsorptions"[All Fields] OR "adsorptive"[All Fields] OR "adsorptively"[All Fields] OR "adsorptives"[All Fields] OR "adsorptivities"[All Fields] OR "adsorptivity"[All Fields]) OR "cell separation"[All Fields] OR "leukapher*"[All Fields] OR "leukopher*"[All Fields] OR "leukocytapher*"[All Fields] OR "leukocytopher*"[All Fields] OR "lymphapher*"[All Fields] OR "lymphopher*"[All Fields] OR "lymphocytopher*"[All Fields] OR "lymphocytapher*"[All Fields]) AND ("inflammatory bowel disease"[All Fields] OR "ulcerative colitis"[All Fields])                           |
| #5     | #3 AND #4                                                                                                                                                                               | ("gma"[All Fields] OR ("blood component removal"[MeSH Terms] OR ("blood"[All Fields] AND "component"[All Fields] AND "removal"[All Fields]) OR "blood component removal"[All Fields] OR "apheresis"[All Fields]) OR ("adsorption"[MeSH Terms] OR "adsorption"[All Fields] OR "adsorptions"[All Fields] OR "adsorptive"[All Fields] OR "adsorptively"[All Fields] OR "adsorptives"[All Fields] OR "adsorptivities"[All Fields] OR "adsorptivity"[All Fields]) OR "cell separation"[All Fields] OR "leukapher*"[All Fields] OR "leukopher*"[All Fields] OR "leukocytapher*"[All Fields] OR "leukocytopher*"[All Fields] OR "lymphapher*"[All Fields] OR "lymphopher*"[All Fields] OR "lymphocytopher*"[All Fields] OR "lymphocytapher*"[All Fields]) AND ("inflammatory bowel disease"[All Fields] OR "ulcerative colitis"[All Fields]) AND "random*"[All Fields] |

|                    | Random sequence generation (selection bias) | Allocation concealment (selection bias) | Blinding of participants and personnel (performance bias) | Blinding of outcome assessment (detection bias) | Incomplete outcome data (attrition bias) | Selective reporting (reporting bias) | Other bias |
|--------------------|---------------------------------------------|-----------------------------------------|-----------------------------------------------------------|-------------------------------------------------|------------------------------------------|--------------------------------------|------------|
| Bresci 2008        | ?                                           | ?                                       | -                                                         | ?                                               | +                                        | +                                    | +          |
| Doménech 2018      | +                                           | +                                       | -                                                         | -                                               | +                                        | +                                    | +          |
| Eberhardson 2016   | ?                                           | ?                                       | ?                                                         | +                                               | +                                        | ?                                    | +          |
| Emmrich 2006       | ?                                           | ?                                       | -                                                         | ?                                               | +                                        | ?                                    | +          |
| Fukunaga 2012      | +                                           | +                                       | +                                                         | ?                                               | +                                        | +                                    | +          |
| Hanai 2004         | ?                                           | ?                                       | -                                                         | +                                               | +                                        | +                                    | +          |
| Hanai 2008         | ?                                           | ?                                       | -                                                         | +                                               | +                                        | +                                    | +          |
| Maiden 2012        | +                                           | ?                                       | -                                                         | -                                               | +                                        | ?                                    | +          |
| Nakamura 2004      | ?                                           | ?                                       | -                                                         | ?                                               | +                                        | +                                    | +          |
| Sands 2008 A study | +                                           | +                                       | +                                                         | +                                               | +                                        | +                                    | -          |
| Sands 2008 B study | +                                           | +                                       | +                                                         | +                                               | +                                        | +                                    | -          |
| Sawada 2005        | ?                                           | +                                       | +                                                         | +                                               | +                                        | +                                    | +          |

# Supplementary Figure 2

1  
2  
3  
4  
5  
6  
7  
8  
9  
10  
11  
12  
13  
14  
15  
16  
17  
18  
19  
20  
21

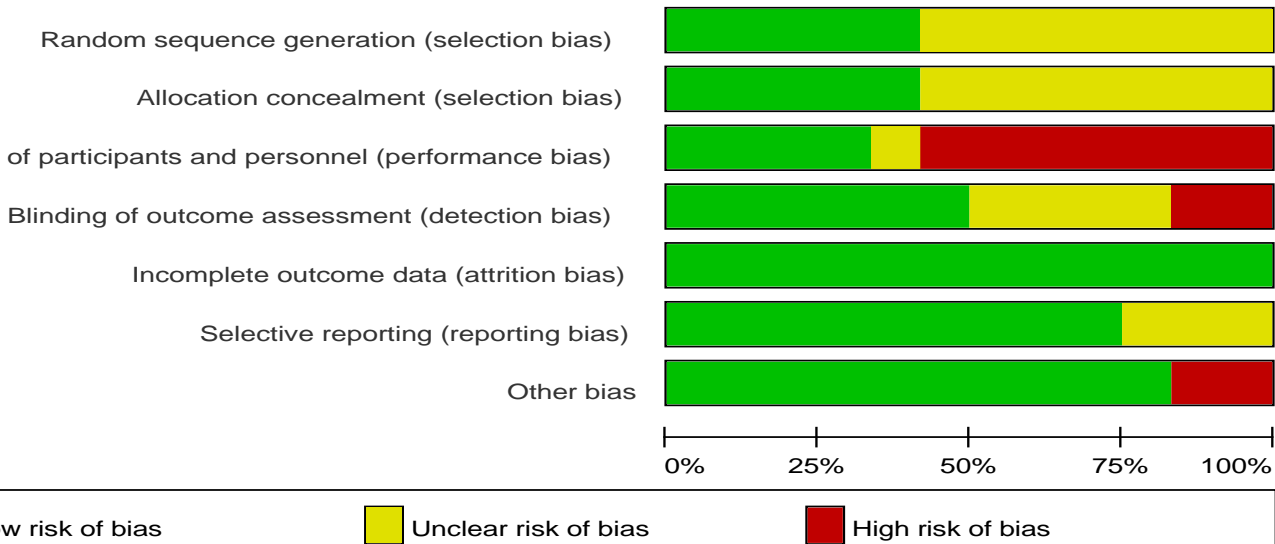

22  
23  
24  
25  
26  
27  
28  
29  
30  
31  
32  
33  
34  
35  
36  
37  
38  
39  
40  
41  
42  
43  
44  
45  
46  
47  
48  
49  
50  
51  
52  
53  
54  
55  
56  
57  
58  
59  
60

**Detailed risk of bias assessment**

| <b>Bresci et al. 2008</b>                                 | Authors judgement | Support for judgement                                                                                                                  |
|-----------------------------------------------------------|-------------------|----------------------------------------------------------------------------------------------------------------------------------------|
| Random sequence generation (selection bias)               | Unclear risk      | Stated as randomized study, but method was not specified in the manuscript                                                             |
| Allocation concealment (selection bias)                   | Unclear risk      | Not described in the manuscript.                                                                                                       |
| Blinding of participants and personnel (performance bias) | High risk         | Not described in the manuscript, but probably not done, because the trial compared an interventional procedure to drug treatment only. |
| Blinding of outcome assessment (detection bias)           | Unclear risk      | Not described in the manuscript.                                                                                                       |
| Incomplete outcome data (attrition bias)                  | Low risk          | Number of patients at baseline and at the end of the follow-up are the same.                                                           |
| Selective reporting (reporting bias)                      | Low risk          | Both significant and non-significant data have been reported. Adverse events were adequately reported.                                 |
| Other bias                                                | Low risk          | The study appears to be free of other sources of bias.                                                                                 |

| <b>Doménech et al. 2018</b>                               | Authors judgement | Support for judgement                                                                                                     |
|-----------------------------------------------------------|-------------------|---------------------------------------------------------------------------------------------------------------------------|
| Random sequence generation (selection bias)               | Low risk          | Quote: "...randomization codes were centrally generated using a computer procedure..."<br>Blocked randomization was used. |
| Allocation concealment (selection bias)                   | Low risk          | Quote: "...randomization codes were centrally generated using a computer procedure..."                                    |
| Blinding of participants and personnel (performance bias) | High risk.        | Open-label.                                                                                                               |
| Blinding of outcome assessment (detection bias)           | High risk         | Quote: "...the endoscopist was not necessarily blinded..."                                                                |
| Incomplete outcome data (attrition bias)                  | Low risk          | Intention-to-treat method was used. 123/125 patients completed the study.                                                 |
| Selective reporting (reporting bias)                      | Low risk          | Both significant and non-significant results have been reported. Adequate                                                 |



|            |          |                                                        |
|------------|----------|--------------------------------------------------------|
|            |          | description of adverse events.                         |
| Other bias | Low risk | The study appears to be free of other sources of bias. |

| <b>Eberhardson et al. 2017</b>                            | Authors judgement | Support for judgement                                                                                                                                                                                                                                                                                                 |
|-----------------------------------------------------------|-------------------|-----------------------------------------------------------------------------------------------------------------------------------------------------------------------------------------------------------------------------------------------------------------------------------------------------------------------|
| Random sequence generation (selection bias)               | Unclear risk      | Blocked randomization (3:2), but method is fully specified.                                                                                                                                                                                                                                                           |
| Allocation concealment (selection bias)                   | Unclear risk      | Not described in the manuscript.                                                                                                                                                                                                                                                                                      |
| Blinding of participants and personnel (performance bias) | Unclear risk      | Double-blind, but insufficient data to permit judgement (form of placebo treatment was not described).                                                                                                                                                                                                                |
| Blinding of outcome assessment (detection bias)           | Low risk          | Quote: "The FACS analysis was blinded to the clinical participants and the FACS analyst was also blinded before unblinding day 12."                                                                                                                                                                                   |
| Incomplete outcome data (attrition bias)                  | Low risk          | 1/9 patient from the placebo group was excluded from the study just after the randomization because of SADE (failure to return blood from the column). 2/14 (14%) were excluded from active study group because of adverse event and worsening of the disease, but analysis was conducted on full analyses set basis. |
| Selective reporting (reporting bias)                      | Unclear risk      | Report of adverse events seems to be inadequate.                                                                                                                                                                                                                                                                      |
| Other bias                                                | Low risk          | The study appears to be free of other sources of bias.                                                                                                                                                                                                                                                                |

| <b>Hanai et al. 2004</b>                                  | Authors judgement | Support for judgement                                                                                |
|-----------------------------------------------------------|-------------------|------------------------------------------------------------------------------------------------------|
| Random sequence generation (selection bias)               | Unclear risk      | Randomized study, but method was not specified in the manuscript.                                    |
| Allocation concealment (selection bias)                   | Unclear risk      | Not described in the manuscript.                                                                     |
| Blinding of participants and personnel (performance bias) | High risk         | Not described in the manuscript, but other similar article from the authors was stated as unblinded. |
| Blinding of outcome assessment (detection bias)           | Low risk          | Quote: "Each patient was assessed blindly..."                                                        |

|                                          |          |                                                                              |
|------------------------------------------|----------|------------------------------------------------------------------------------|
| Incomplete outcome data (attrition bias) | Low risk | Number of patients at baseline and at the end of the follow-up are the same. |
| Selective reporting (reporting bias)     | Low risk | Both significant and non-significant results have been reported.             |
| Other bias                               | Low risk | The study appears to be free of other sources of bias.                       |

| <b>Hanai et al. 2008</b>                                  | Authors judgement | Support for judgement                                                       |
|-----------------------------------------------------------|-------------------|-----------------------------------------------------------------------------|
| Random sequence generation (selection bias)               | Unclear risk      | Randomized study, but method is not described in the manuscript.            |
| Allocation concealment (selection bias)                   | Unclear risk      | Not described in the manuscript.                                            |
| Blinding of participants and personnel (performance bias) | High risk         | Stated as unblinded.                                                        |
| Blinding of outcome assessment (detection bias)           | Low risk          | Quote: "Each patient was assessed blindly..."                               |
| Incomplete outcome data (attrition bias)                  | Low risk          | Number of patients at baseline and at the end of the follow-up are the same |
| Selective reporting (reporting bias)                      | Low risk          | Both significant and non-significant results have been reported             |
| Other bias                                                | Low risk          | The study appears to be free of other sources of bias.                      |

| <b>Nakamura et al. 2004</b>                               | Authors judgement | Support for judgement                                                                                                                  |
|-----------------------------------------------------------|-------------------|----------------------------------------------------------------------------------------------------------------------------------------|
| Random sequence generation (selection bias)               | Unclear risk      | Randomized, but the method was not specified in the manuscript                                                                         |
| Allocation concealment (selection bias)                   | Unclear risk      | Not described in the manuscript.                                                                                                       |
| Blinding of participants and personnel (performance bias) | High risk         | Not described in the manuscript, but probably not done, because the trial compared an interventional procedure to drug treatment only. |
| Blinding of outcome assessment (detection bias)           | Unclear risk      | No information                                                                                                                         |
| Incomplete outcome data (attrition bias)                  | Low risk          | 60/66 completed the study; 1 took non-permitted drugs, 1 relapsed just after the randomization, further 4 withdrew the consent.        |

|                                      |          |                                                                 |
|--------------------------------------|----------|-----------------------------------------------------------------|
| Selective reporting (reporting bias) | Low risk | Both significant and non-significant results have been reported |
| Other bias                           | Low risk | The study appears to be free of other sources of bias.          |

| <b>Sands et al. 2008 A study</b>                          | Authors judgement | Support for judgement                                                                                                                                                                              |
|-----------------------------------------------------------|-------------------|----------------------------------------------------------------------------------------------------------------------------------------------------------------------------------------------------|
| Random sequence generation (selection bias)               | Low risk          | Quote: "...using sealed envelopes with sequential numbers issued in blocks of 3..." and                                                                                                            |
| Allocation concealment (selection bias)                   | Low risk          | Quote: "...using sealed envelopes with sequential numbers issued in blocks of 3..." and                                                                                                            |
| Blinding of participants and personnel (performance bias) | Low risk          | Quote: "a polyvinylchloride bypass tube was inserted between the Adacolumn and the Adacircuit to permit bypass of the column among patients undergoing sham procedures."                           |
| Blinding of outcome assessment (detection bias)           | Low risk          | The gastroenterology team was blinded to the treatment assignment.                                                                                                                                 |
| Incomplete outcome data (attrition bias)                  | Low risk          | Intention-to-treat analysis; however, 66% of patients completed the study (6 patients left the study because of disease flare; 5 from apheresis group, 1 from sham group).                         |
| Selective reporting (reporting bias)                      | Low risk          | Both significant and non-significant results have been reported                                                                                                                                    |
| Other bias                                                | High risk         | Quote: "Subjects who withdrew before the week 12 visit were treated as treatment failure for primary end point (clinical remission)."<br>Comment: these imputation of ITT analysis may cause bias. |

| <b>Sands et al. 2008 B study</b>            | Authors judgement | Support for judgement                                                        |
|---------------------------------------------|-------------------|------------------------------------------------------------------------------|
| Random sequence generation (selection bias) | Low risk          | Quote: "Randomization was performed according to a computer-generated scheme |

|                                                           |           |                                                                                                                                                                                                    |
|-----------------------------------------------------------|-----------|----------------------------------------------------------------------------------------------------------------------------------------------------------------------------------------------------|
|                                                           |           | that used an integrated voice response system."                                                                                                                                                    |
| Allocation concealment (selection bias)                   | Low risk  | Quote: "Randomization was performed according to a computer-generated scheme that used an integrated voice response system."                                                                       |
| Blinding of participants and personnel (performance bias) | Low risk  | Quote: "a polyvinylchloride bypass tube was inserted between the Adacolumn and the Adacircuit to permit bypass of the column among patients undergoing sham procedures."                           |
| Blinding of outcome assessment (detection bias)           | Low risk  | The gastroenterology team was blinded to the treatment assignment.                                                                                                                                 |
| Incomplete outcome data (attrition bias)                  | Low risk  | Intention-to-treat analysis; however, 66% of patients completed the study (6 patients left the study because of disease flare; 5 from apheresis group, 1 from sham group).                         |
| Selective reporting (reporting bias)                      | Low risk  | Both significant and non-significant results have been reported                                                                                                                                    |
| Other bias                                                | High risk | Quote: "Subjects who withdrew before the week 12 visit were treated as treatment failure for primary end point (clinical remission)."<br>Comment: these imputation of ITT analysis may cause bias. |

| <b>Sawada et al. 2005</b>                                 | Authors judgement | Support for judgement                                                                                                                                                                 |
|-----------------------------------------------------------|-------------------|---------------------------------------------------------------------------------------------------------------------------------------------------------------------------------------|
| Random sequence generation (selection bias)               | Unclear risk      | minimization by an independent controller.                                                                                                                                            |
| Allocation concealment (selection bias)                   | Unclear risk      | Quote: "The assignment of the enrolled patients to the active group or the sham group was performed by a controller who was independent of the other staff, patients, and relatives." |
| Blinding of participants and personnel (performance bias) | Low risk          | Quote: "Both columns were covered with an opaque material so that they could                                                                                                          |

|                                                 |          |                                                                                                                                                       |
|-------------------------------------------------|----------|-------------------------------------------------------------------------------------------------------------------------------------------------------|
|                                                 |          | not be distinguished by the patients."                                                                                                                |
| Blinding of outcome assessment (detection bias) | Low risk | Quote: "To ensure proper blinding within the clinical evaluation, the medical staffs of each institution were separated into two independent groups." |
| Incomplete outcome data (attrition bias)        | Low risk | All of the enrolled eligible patients were evaluated.                                                                                                 |
| Selective reporting (reporting bias)            | Low risk | All outcomes of interest were reported.                                                                                                               |
| Other bias                                      | Low risk | The study appears to be free of other sources of bias. Comment: these imputation of ITT analysis may cause bias.                                      |

| <b>Emmrich et al. 2006</b>                                | Authors judgement | Support for judgement                                                                                                                  |
|-----------------------------------------------------------|-------------------|----------------------------------------------------------------------------------------------------------------------------------------|
| Random sequence generation (selection bias)               | Unclear risk      | Randomized, but method is not specified in the manuscript.                                                                             |
| Allocation concealment (selection bias)                   | Unclear risk      | Not described in the manuscript.                                                                                                       |
| Blinding of participants and personnel (performance bias) | High risk         | Not described in the manuscript, but probably not done, because the trial compared an interventional procedure to drug treatment only. |
| Blinding of outcome assessment (detection bias)           | Unclear risk      | Not described in the manuscript.                                                                                                       |
| Incomplete outcome data (attrition bias)                  | Low risk          | Only 1/9 patient from active group discontinued the study.                                                                             |
| Selective reporting (reporting bias)                      | Unclear risk      | Report of adverse events seems to be inadequate.                                                                                       |
| Other bias                                                | Low risk          | The study appears to be free of other sources of bias.                                                                                 |

| <b>Fukunaga et al. 2012</b>                               | Authors judgement | Support for judgement                                                                       |
|-----------------------------------------------------------|-------------------|---------------------------------------------------------------------------------------------|
| Random sequence generation (selection bias)               | Low risk          | Blocked randomization according to a computer-generated scheme.                             |
| Allocation concealment (selection bias)                   | Low risk          | Patients were randomized in a 1:1:1 ratio by a statistician at an independent organization. |
| Blinding of participants and personnel (performance bias) | Low risk          | Quote: "Both patients and the physician were blinded by a curtain."                         |

|                                                 |              |                                                                                                                                                                                                                                        |
|-------------------------------------------------|--------------|----------------------------------------------------------------------------------------------------------------------------------------------------------------------------------------------------------------------------------------|
| Blinding of outcome assessment (detection bias) | Unclear risk | Not described in the manuscript.                                                                                                                                                                                                       |
| Incomplete outcome data (attrition bias)        | Low risk     | 21/22 completed the study.                                                                                                                                                                                                             |
| Selective reporting (reporting bias)            | Low risk     | Both significant and non-significant results have been reported.                                                                                                                                                                       |
| Other bias                                      | Unclear risk | Concomitant therapeutic regimen was not described clearly, and the authors stated: "a significant fraction of patients in each arm were on concomitant PSL or AZA and this enabled us to assess the contribution of these medications" |

| <b>Maiden et al. 2008</b>                                 | Authors judgement | Support for judgement                                                                                     |
|-----------------------------------------------------------|-------------------|-----------------------------------------------------------------------------------------------------------|
| Random sequence generation (selection bias)               | Low risk          | Quote: "Randomization was conducted using a linear random number generator of 0 to 1."                    |
| Allocation concealment (selection bias)                   | Unclear risk      | Not described in the manuscript.                                                                          |
| Blinding of participants and personnel (performance bias) | High risk         | Open label                                                                                                |
| Blinding of outcome assessment (detection bias)           | High risk         | Open label                                                                                                |
| Incomplete outcome data (attrition bias)                  | Low risk          | Number of patients at baseline and at the end of the follow-up are the same.                              |
| Selective reporting (reporting bias)                      | Unclear risk      | Report of adverse events seems to be inadequate. Number of events in the control group was not described. |
| Other bias                                                | Low risk          | The study appears to be free of other sources of bias.                                                    |

# Supplementary Figure 3

1  
2  
3  
4  
5  
6  
7  
8  
9  
10  
11  
12  
13  
14  
15  
16  
17  
18  
19  
20  
21  
22  
23  
24  
25  
26  
27  
28  
29  
30  
31  
32  
33  
34  
35  
36  
37  
38  
39  
40  
41  
42  
43  
44  
45  
46  
47  
48  
49  
50  
51  
52  
53  
54  
55  
56  
57  
58  
59  
60







# Supplementary Figure 5

1  
2  
3  
4  
5  
6  
7  
8  
9  
10  
11  
12  
13  
14  
15  
16  
17  
18  
19  
20  
21  
22  
23  
24  
25  
26  
27  
28  
29  
30  
31  
32  
33  
34  
35  
36  
37  
38  
39  
40  
41  
42  
43  
44  
45  
46  
47  
48  
49  
50  
51  
52  
53  
54  
55  
56  
57  
58  
59  
60

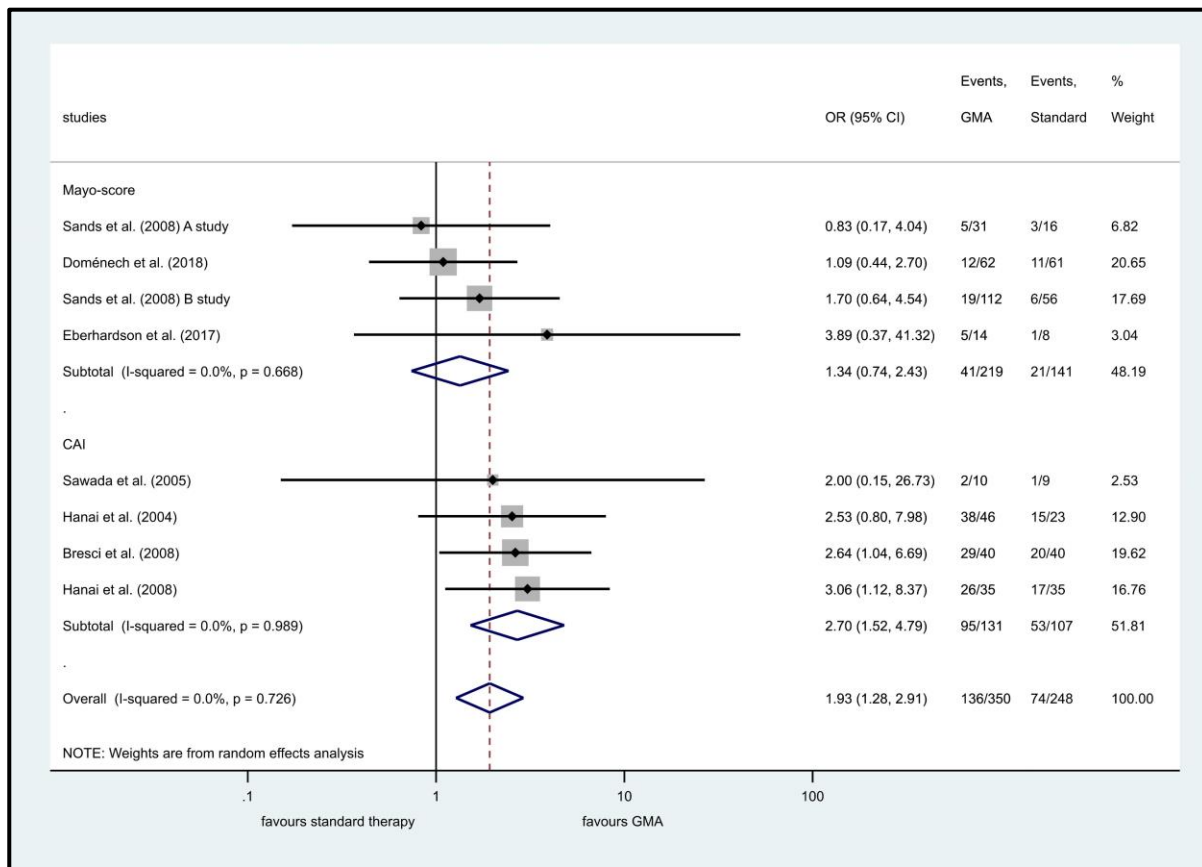

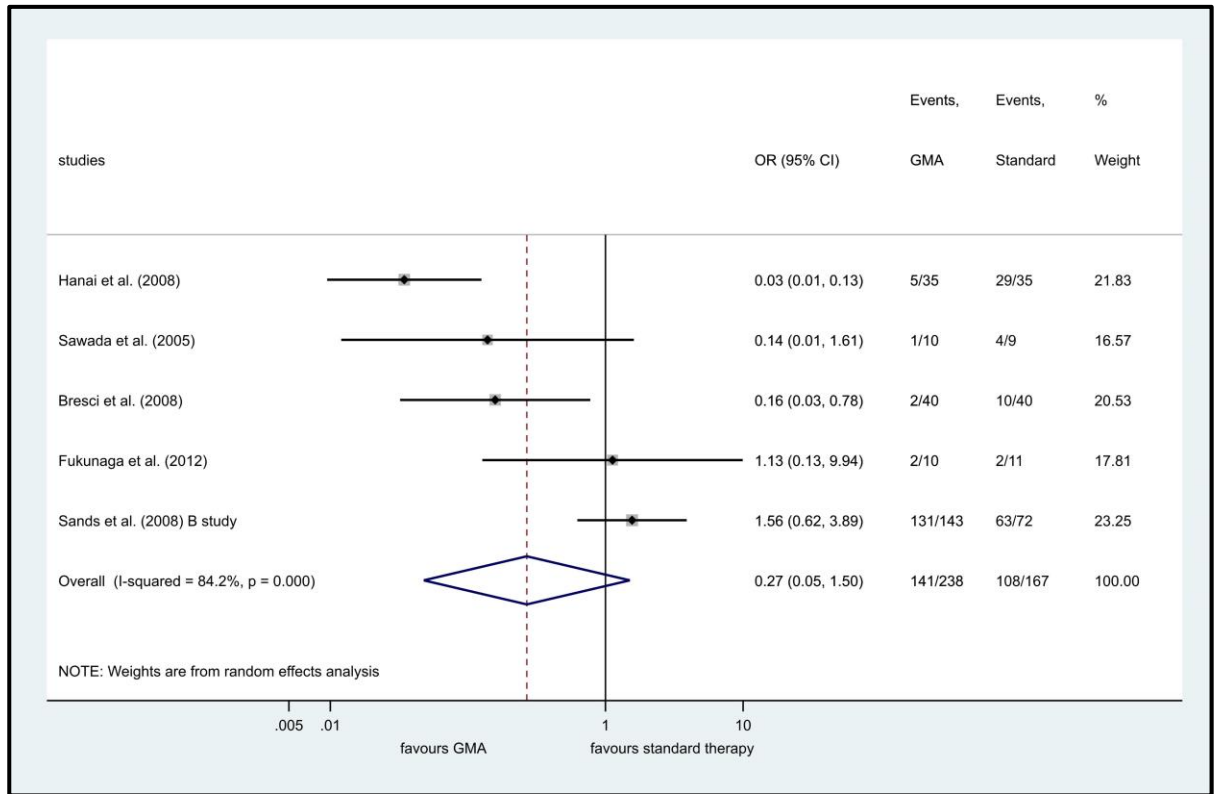

# Supplementary Figure 7

1  
2  
3  
4  
5  
6  
7  
8  
9  
10  
11  
12  
13  
14  
15  
16  
17  
18  
19  
20  
21  
22  
23  
24  
25  
26  
27  
28  
29  
30  
31  
32  
33  
34  
35  
36  
37  
38  
39  
40  
41  
42  
43  
44  
45  
46  
47  
48  
49  
50  
51  
52  
53  
54  
55  
56  
57  
58  
59  
60

A

B

C

D

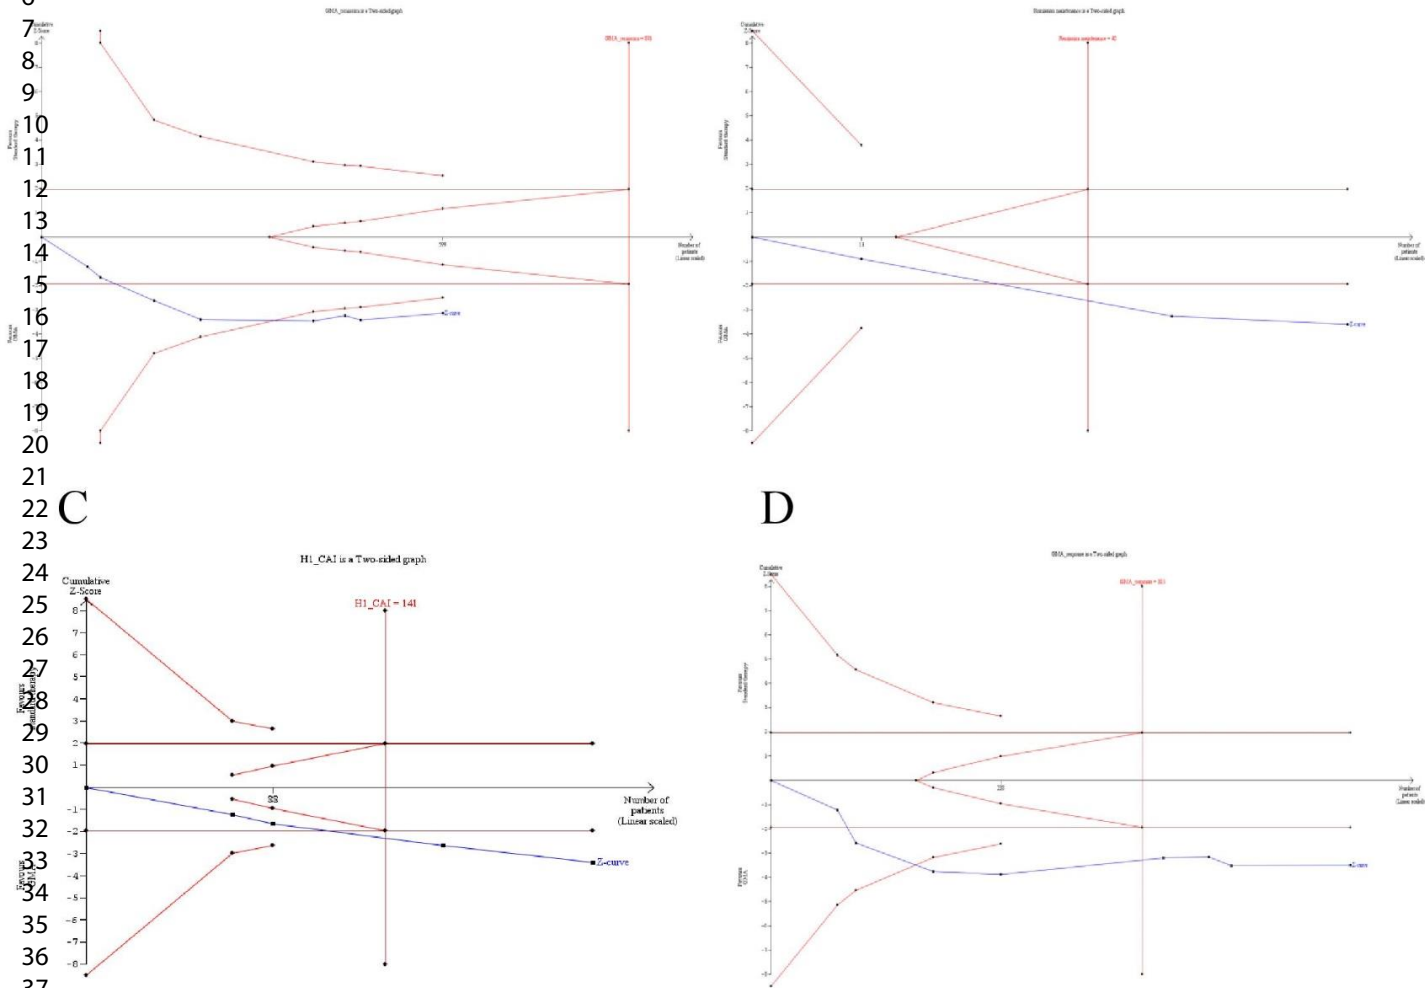

| Study                | Reported adverse events                                                                                                                                                                                                                                           |
|----------------------|-------------------------------------------------------------------------------------------------------------------------------------------------------------------------------------------------------------------------------------------------------------------|
| Hanai et al. 2004    | flushing, nausea, mild fever                                                                                                                                                                                                                                      |
| Sawada et al. 2005   | fever, skin rash, back pain                                                                                                                                                                                                                                       |
| Bresci et al. 2008   | headache, gastrointestinal intolerance, facies lunaris, vascular hypertension, glucose intolerance                                                                                                                                                                |
| Fukunaga et al. 2012 | nausea, skin itchiness                                                                                                                                                                                                                                            |
| Sands et al. 2008    | headache, disease flare-up, decreased diastolic blood pressure, nasopharyngitis, hypotension, nausea, fatigue, post procedure hematoma, abdominal pain, dizziness, vomiting, vessel puncture site bruise, diarrhea, upper respiratory tract infection, flatulence |

## Supplementary Table 2

| Certainty assessment                                                  |                   |              |               |                           |                             |                                     | № of patients                                                                      |                                                   | Effect                            |                                                              | Certainty        | Importance |
|-----------------------------------------------------------------------|-------------------|--------------|---------------|---------------------------|-----------------------------|-------------------------------------|------------------------------------------------------------------------------------|---------------------------------------------------|-----------------------------------|--------------------------------------------------------------|------------------|------------|
| № of studies                                                          | Study design      | Risk of bias | Inconsistency | Indirectness              | Imprecision                 | Other considerations                | standard therapy for clinical remission induction and GMA as an adjunctive therapy | standard therapy for clinical remission induction | Relative (95% CI)                 | Absolute (95% CI)                                            |                  |            |
| <b>Clinical remission rate (assessed with: CAI or Mayo-score)</b>     |                   |              |               |                           |                             |                                     |                                                                                    |                                                   |                                   |                                                              |                  |            |
| 8                                                                     | randomized trials | very serious | not serious   | not serious               | serious                     | none                                | 136/350 (38.9%)                                                                    | 74/249 (29.7%)                                    | <b>OR 1.94</b><br>(1.28 to 2.92)  | <b>153 more per 1 000</b><br>(from 54 more to 255 more)      | ⊕○○○<br>VERY LOW | CRITICAL   |
| <b>Clinical response and clinical improvement (CAI or Mayo-score)</b> |                   |              |               |                           |                             |                                     |                                                                                    |                                                   |                                   |                                                              |                  |            |
| 8                                                                     | randomized trials | very serious | not serious   | not serious               | not serious                 | none                                | 249/350 (71.1%)                                                                    | 140/249 (56.2%)                                   | <b>OR 2.05</b><br>(1.37 to 3.06)  | <b>162 more per 1 000</b><br>(from 75 more to 235 more)      | ⊕⊕○○<br>LOW      | CRITICAL   |
| <b>Clinical remission maintenance rate (assessed with: CAI)</b>       |                   |              |               |                           |                             |                                     |                                                                                    |                                                   |                                   |                                                              |                  |            |
| 3                                                                     | randomized trials | serious      | not serious   | serious <sup>a</sup>      | not serious                 | none                                | 39/36 (108.3%)                                                                     | 17/35 (48.6%)                                     | <b>OR 8.34</b><br>(2.64 to 26.32) | <b>402 more per 1 000</b><br>(from 228 more to 476 more)     | ⊕⊕○○<br>LOW      | CRITICAL   |
| <b>Adverse events</b>                                                 |                   |              |               |                           |                             |                                     |                                                                                    |                                                   |                                   |                                                              |                  |            |
| 5                                                                     | randomized trials | very serious | not serious   | very serious <sup>b</sup> | very serious <sup>c,d</sup> | publication bias strongly suspected | 141/238 (59.2%)                                                                    | 108/167 (64.7%)                                   | <b>OR 0.27</b><br>(0.05 to 1.50)  | <b>316 fewer per 1 000</b><br>(from 563 fewer to 86 more)    | ⊕○○○<br>VERY LOW | IMPORTANT  |
| <b>Steroid-sparing effect</b>                                         |                   |              |               |                           |                             |                                     |                                                                                    |                                                   |                                   |                                                              |                  |            |
| 3                                                                     | randomized trials | serious      | not serious   | not serious               | very serious <sup>d</sup>   | none                                | 66                                                                                 | 43                                                | -                                 | <b>WMD 6.83 mg/day lower</b><br>(14.47 lower to 0.81 higher) | ⊕○○○<br>VERY LOW | IMPORTANT  |

CI: Confidence interval; OR: Odds ratio

### Explanations

a. Duration of follow-up differs among studies (6 months or 12 months). b. Pool of adverse events differs among studies. c. The optimal information size criterion is not met. d. TSA could not be carried out.



# PRISMA 2009 Checklist

| Section/topic                      | #  | Checklist item                                                                                                                                                                                                                                                                                              | Reported on page # |
|------------------------------------|----|-------------------------------------------------------------------------------------------------------------------------------------------------------------------------------------------------------------------------------------------------------------------------------------------------------------|--------------------|
| <b>TITLE</b>                       |    |                                                                                                                                                                                                                                                                                                             |                    |
| Title                              | 1  | Identify the report as a systematic review, meta-analysis, or both.                                                                                                                                                                                                                                         | 1                  |
| <b>ABSTRACT</b>                    |    |                                                                                                                                                                                                                                                                                                             |                    |
| Structured summary                 | 2  | Provide a structured summary including, as applicable: background; objectives; data sources; study eligibility criteria, participants, and interventions; study appraisal and synthesis methods; results; limitations; conclusions and implications of key findings; systematic review registration number. | 2                  |
| <b>INTRODUCTION</b>                |    |                                                                                                                                                                                                                                                                                                             |                    |
| Rationale                          | 3  | Describe the rationale for the review in the context of what is already known.                                                                                                                                                                                                                              | 3                  |
| Objectives                         | 4  | Provide an explicit statement of questions being addressed with reference to participants, interventions, comparisons, outcomes, and study design (PICOS).                                                                                                                                                  | 3-4                |
| <b>METHODS</b>                     |    |                                                                                                                                                                                                                                                                                                             |                    |
| Protocol and registration          | 5  | Indicate if a review protocol exists, if and where it can be accessed (e.g., Web address), and, if available, provide registration information including registration number.                                                                                                                               | 2, 3               |
| Eligibility criteria               | 6  | Specify study characteristics (e.g., PICOS, length of follow-up) and report characteristics (e.g., years considered, language, publication status) used as criteria for eligibility, giving rationale.                                                                                                      | 4                  |
| Information sources                | 7  | Describe all information sources (e.g., databases with dates of coverage, contact with study authors to identify additional studies) in the search and date last searched.                                                                                                                                  | 3, 4               |
| Search                             | 8  | Present full electronic search strategy for at least one database, including any limits used, such that it could be repeated.                                                                                                                                                                               | Suppl.             |
| Study selection                    | 9  | State the process for selecting studies (i.e., screening, eligibility, included in systematic review, and, if applicable, included in the meta-analysis).                                                                                                                                                   | 4                  |
| Data collection process            | 10 | Describe method of data extraction from reports (e.g., piloted forms, independently, in duplicate) and any processes for obtaining and confirming data from investigators.                                                                                                                                  | 4                  |
| Data items                         | 11 | List and define all variables for which data were sought (e.g., PICOS, funding sources) and any assumptions and simplifications made.                                                                                                                                                                       | 4                  |
| Risk of bias in individual studies | 12 | Describe methods used for assessing risk of bias of individual studies (including specification of whether this was done at the study or outcome level), and how this information is to be used in any data synthesis.                                                                                      | 4, 5               |
| Summary measures                   | 13 | State the principal summary measures (e.g., risk ratio, difference in means).                                                                                                                                                                                                                               | 5                  |
| Synthesis of results               | 14 | Describe the methods of handling data and combining results of studies, if done, including measures of consistency (e.g., $I^2$ ) for each meta-analysis.                                                                                                                                                   | 5-6                |

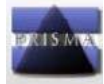

# PRISMA 2009 Checklist

| Section/topic                 | #  | Checklist item                                                                                                                                                                                           | Reported on page #                              |
|-------------------------------|----|----------------------------------------------------------------------------------------------------------------------------------------------------------------------------------------------------------|-------------------------------------------------|
| Risk of bias across studies   | 15 | Specify any assessment of risk of bias that may affect the cumulative evidence (e.g., publication bias, selective reporting within studies).                                                             | 5                                               |
| Additional analyses           | 16 | Describe methods of additional analyses (e.g., sensitivity or subgroup analyses, meta-regression), if done, indicating which were pre-specified.                                                         | 5                                               |
| <b>RESULTS</b>                |    |                                                                                                                                                                                                          |                                                 |
| Study selection               | 17 | Give numbers of studies screened, assessed for eligibility, and included in the review, with reasons for exclusions at each stage, ideally with a flow diagram.                                          | 5, Figure 1                                     |
| Study characteristics         | 18 | For each study, present characteristics for which data were extracted (e.g., study size, PICOS, follow-up period) and provide the citations.                                                             | 5, 6, Table 1                                   |
| Risk of bias within studies   | 19 | Present data on risk of bias of each study and, if available, any outcome level assessment (see item 12).                                                                                                | 6, Suppl. Figure 1                              |
| Results of individual studies | 20 | For all outcomes considered (benefits or harms), present, for each study: (a) simple summary data for each intervention group (b) effect estimates and confidence intervals, ideally with a forest plot. | 6, Figure 2-3, Suppl. Figure 4-5                |
| Synthesis of results          | 21 | Present the main results of the review. If meta-analyses are done, include for each, confidence intervals and measures of consistency                                                                    | 9, Figure 2-3, Suppl. Figure 3, Suppl. Figure 6 |
| Risk of bias across studies   | 22 | Present results of any assessment of risk of bias across studies (see Item 15).                                                                                                                          | Suppl. Figure 2                                 |
| Additional analysis           | 23 | Give results of additional analyses, if done (e.g., sensitivity or subgroup analyses, meta-regression [see Item 16]).                                                                                    | Suppl. Figure 4-5; Suppl. Figure 7              |
| <b>DISCUSSION</b>             |    |                                                                                                                                                                                                          |                                                 |
| Summary of evidence           | 24 | Summarize the main findings including the strength of evidence for each main outcome; consider their relevance to key groups (e.g., healthcare providers, users, and policy makers).                     | Suppl. Table 1                                  |



# PRISMA 2009 Checklist

|                |    |                                                                                                                                                               |      |
|----------------|----|---------------------------------------------------------------------------------------------------------------------------------------------------------------|------|
| Limitations    | 25 | Discuss limitations at study and outcome level (e.g., risk of bias), and at review-level (e.g., incomplete retrieval of identified research, reporting bias). | 2, 9 |
| Conclusions    | 26 | Provide a general interpretation of the results in the context of other evidence, and implications for future research.                                       | 9    |
| <b>FUNDING</b> |    |                                                                                                                                                               |      |
| Funding        | 27 | Describe sources of funding for the systematic review and other support (e.g., supply of data); role of funders for the systematic review.                    | 10   |

From: Moher D, Liberati A, Tetzlaff J, Altman DG, The PRISMA Group (2009). Preferred Reporting Items for Systematic Reviews and Meta-Analyses: The PRISMA Statement. PLoS Med 6(7): e1000097. doi:10.1371/journal.pmed1000097

For more information, visit: [www.prisma-statement.org](http://www.prisma-statement.org).

Page 2 of 2
