# Supplementary material for: Granulocyte and monocyte apheresis as an adjunctive therapy to induce and maintain clinical remission in ulcerative colitis: a systematic review and meta-analysis
Source: PubMed Central journal article supplement — BMJ Open. 2021 May 19;11(5):e042374. doi: 10.1136/bmjopen-2020-042374 (PMC8137160; doi:10.1136/bmjopen-2020-042374), 2021-05-19
Supplement: bmjopen-2020-042374supp001.pdf [file bmjopen-2020-042374supp001.pdf]

## Supplementary material

### Granulocyte and monocyte apheresis as an adjunctive therapy to induce and maintain clinical remission in ulcerative colitis: A systematic review and meta-analysis

Szabolcs Kiss<sup>1,2</sup>, Dávid Németh<sup>2</sup>, Péter Hegyi<sup>2,3</sup>, Mária Földi<sup>1,2</sup>, Zsolt Szakács<sup>2,3</sup>, Bálint Erőss<sup>2,3</sup>, Benedek Tinusz<sup>4</sup>, Péter Jenő Hegyi<sup>2,5</sup>, Patrícia Sarlós<sup>2,5</sup>, Hussain Alizadeh<sup>1,6\*</sup>

<sup>1</sup>Doctoral School of Clinical Medicine, University of Szeged, Szeged, Hungary

<sup>2</sup>Institute for Translational Medicine, Medical School, University of Pécs, Pécs, Hungary

<sup>3</sup>János Szentágothai Research Centre, University of Pécs, Pécs, Hungary

<sup>4</sup>First Department of Medicine, Medical School, University of Pécs, Pécs, Hungary

<sup>5</sup>Division of Gastroenterology, First Department of Medicine, Medical School, University of Pécs, Pécs, Hungary

<sup>6</sup>Division of Haematology, First Department of Medicine, Medical School, University of Pécs, Pécs, Hungary

**\* Correspondence:**

Alizadeh Hussain M.D., Ph.D., Address: First Department of Medicine, University of Pécs Medical School, H-7624 Pécs, Ifjúság útja 13., Hungary; Tel: +(36-30) 643-6099  
E-mail: alizadeh.hussain@pte.hu

Keywords: Inflammatory bowel disease

## Search strategy for MEDLINE database

Date of search: 5<sup>th</sup> March, 2019

Full query: (gma OR apheresis OR adsorption OR "cell separation" OR leukapher\* OR leukopher\* OR leukocytapher\* OR leukocytopher\* OR lymphapher\* OR lymphopher\* OR lymphocytopher\* OR lymphocytapher\*) AND ("inflammatory bowel disease" OR "ulcerative colitis") AND (random\*)

No filters or restrictions were applied.

| Search | Query                                                                                                                                                                                   | Automatic explosion                                                                                                                                                                                                                                                                                                                                                                                                                                                                                                                                                                                                                                                                                                                                                                                                                                                      |
|--------|-----------------------------------------------------------------------------------------------------------------------------------------------------------------------------------------|--------------------------------------------------------------------------------------------------------------------------------------------------------------------------------------------------------------------------------------------------------------------------------------------------------------------------------------------------------------------------------------------------------------------------------------------------------------------------------------------------------------------------------------------------------------------------------------------------------------------------------------------------------------------------------------------------------------------------------------------------------------------------------------------------------------------------------------------------------------------------|
| #1     | gma OR apheresis OR adsorption OR "cell separation" OR leukapher* OR leukopher* OR leukocytapher* OR leukocytopher* OR lymphapher* OR lymphopher* OR lymphocytopher* OR lymphocytapher* | ("gma"[All Fields] OR ("blood component removal"[MeSH Terms] OR ("blood"[All Fields] AND "component"[All Fields] AND "removal"[All Fields]) OR "blood component removal"[All Fields] OR "apheresis"[All Fields]) OR ("adsorption"[MeSH Terms] OR "adsorption"[All Fields] OR "adsorptions"[All Fields] OR "adsorptive"[All Fields] OR "adsorptively"[All Fields] OR "adsorptives"[All Fields] OR "adsorptivities"[All Fields] OR "adsorptivity"[All Fields]) OR "cell separation"[All Fields] OR "leukapher*" [All Fields] OR "leukopher*" [All Fields] OR "leukocytapher*" [All Fields] OR "leukocytopher*" [All Fields] OR "lymphapher*" [All Fields] OR "lymphopher*" [All Fields] OR "lymphocytopher*" [All Fields] OR "lymphocytapher*" [All Fields])                                                                                                               |
| #2     | "inflammatory bowel disease" OR "ulcerative colitis"                                                                                                                                    | "inflammatory bowel disease"[All Fields] OR "ulcerative colitis"[All Fields]                                                                                                                                                                                                                                                                                                                                                                                                                                                                                                                                                                                                                                                                                                                                                                                             |
| #3     | random*                                                                                                                                                                                 | "random*" [All Fields]                                                                                                                                                                                                                                                                                                                                                                                                                                                                                                                                                                                                                                                                                                                                                                                                                                                   |
| #4     | #1 AND #2                                                                                                                                                                               | ("gma"[All Fields] OR ("blood component removal"[MeSH Terms] OR ("blood"[All Fields] AND "component"[All Fields] AND "removal"[All Fields]) OR "blood component removal"[All Fields] OR "apheresis"[All Fields]) OR ("adsorption"[MeSH Terms] OR "adsorption"[All Fields] OR "adsorptions"[All Fields] OR "adsorptive"[All Fields] OR "adsorptively"[All Fields] OR "adsorptives"[All Fields] OR "adsorptivities"[All Fields] OR "adsorptivity"[All Fields]) OR "cell separation"[All Fields] OR "leukapher*" [All Fields] OR "leukopher*" [All Fields] OR "leukocytapher*" [All Fields] OR "leukocytopher*" [All Fields] OR "lymphapher*" [All Fields] OR "lymphopher*" [All Fields] OR "lymphocytopher*" [All Fields] OR "lymphocytapher*" [All Fields]) AND ("inflammatory bowel disease"[All Fields] OR "ulcerative colitis"[All Fields])                            |
| #5     | #3 AND #4                                                                                                                                                                               | ("gma"[All Fields] OR ("blood component removal"[MeSH Terms] OR ("blood"[All Fields] AND "component"[All Fields] AND "removal"[All Fields]) OR "blood component removal"[All Fields] OR "apheresis"[All Fields]) OR ("adsorption"[MeSH Terms] OR "adsorption"[All Fields] OR "adsorptions"[All Fields] OR "adsorptive"[All Fields] OR "adsorptively"[All Fields] OR "adsorptives"[All Fields] OR "adsorptivities"[All Fields] OR "adsorptivity"[All Fields]) OR "cell separation"[All Fields] OR "leukapher*" [All Fields] OR "leukopher*" [All Fields] OR "leukocytapher*" [All Fields] OR "leukocytopher*" [All Fields] OR "lymphapher*" [All Fields] OR "lymphopher*" [All Fields] OR "lymphocytopher*" [All Fields] OR "lymphocytapher*" [All Fields]) AND ("inflammatory bowel disease"[All Fields] OR "ulcerative colitis"[All Fields]) AND "random*" [All Fields] |

## Supplementary Figure 1

|                    | Random sequence generation (selection bias) | Allocation concealment (selection bias) | Blinding of participants and personnel (performance bias) | Blinding of outcome assessment (detection bias) | Incomplete outcome data (attrition bias) | Selective reporting (reporting bias) | Other bias |
|--------------------|---------------------------------------------|-----------------------------------------|-----------------------------------------------------------|-------------------------------------------------|------------------------------------------|--------------------------------------|------------|
| Bresci 2008        | ?                                           | ?                                       | -                                                         | ?                                               | +                                        | +                                    | +          |
| Doménech 2018      | +                                           | +                                       | -                                                         | -                                               | +                                        | +                                    | +          |
| Eberhardson 2016   | ?                                           | ?                                       | ?                                                         | +                                               | +                                        | ?                                    | +          |
| Emmrich 2006       | ?                                           | ?                                       | -                                                         | ?                                               | +                                        | ?                                    | +          |
| Fukunaga 2012      | +                                           | +                                       | +                                                         | ?                                               | +                                        | +                                    | +          |
| Hanai 2004         | ?                                           | ?                                       | -                                                         | +                                               | +                                        | +                                    | +          |
| Hanai 2008         | ?                                           | ?                                       | -                                                         | +                                               | +                                        | +                                    | +          |
| Maiden 2012        | +                                           | ?                                       | -                                                         | -                                               | +                                        | ?                                    | +          |
| Nakamura 2004      | ?                                           | ?                                       | -                                                         | ?                                               | +                                        | +                                    | +          |
| Sands 2008 A study | +                                           | +                                       | +                                                         | +                                               | +                                        | +                                    | -          |
| Sands 2008 B study | +                                           | +                                       | +                                                         | +                                               | +                                        | +                                    | -          |
| Sawada 2005        | ?                                           | +                                       | +                                                         | +                                               | +                                        | +                                    | +          |

## Supplementary Figure 2

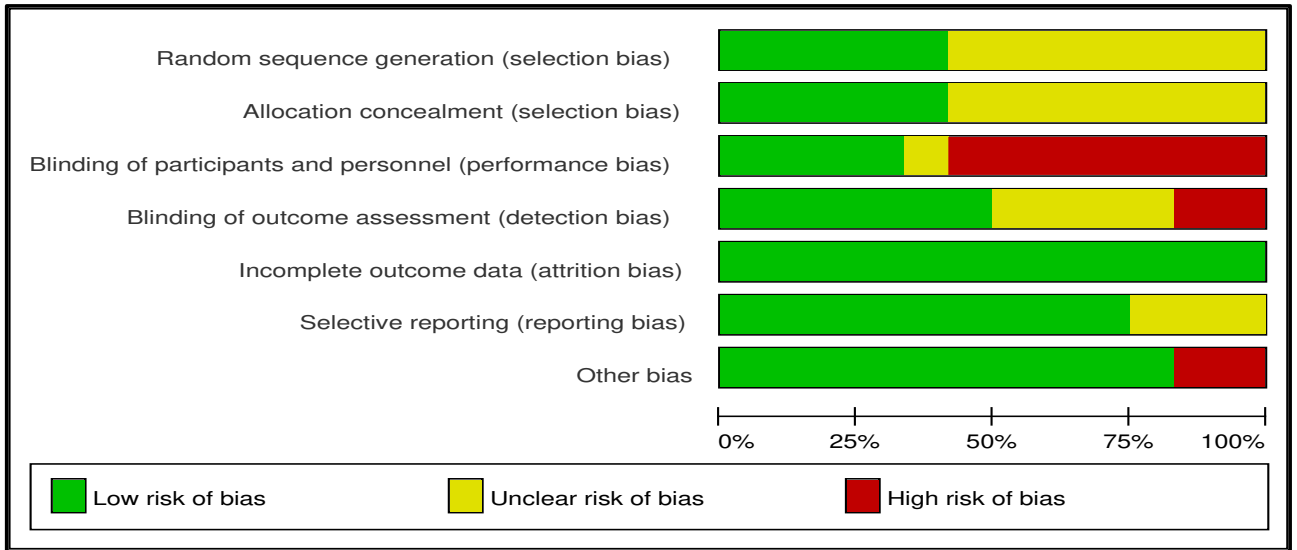

**Detailed risk of bias assessment**

| <b>Bresci et al. 2008</b>                                 | <b>Authors judgement</b> | <b>Support for judgement</b>                                                                                                           |
|-----------------------------------------------------------|--------------------------|----------------------------------------------------------------------------------------------------------------------------------------|
| Random sequence generation (selection bias)               | Unclear risk             | Stated as randomized study, but method was not specified in the manuscript                                                             |
| Allocation concealment (selection bias)                   | Unclear risk             | Not described in the manuscript.                                                                                                       |
| Blinding of participants and personnel (performance bias) | High risk                | Not described in the manuscript, but probably not done, because the trial compared an interventional procedure to drug treatment only. |
| Blinding of outcome assessment (detection bias)           | Unclear risk             | Not described in the manuscript.                                                                                                       |
| Incomplete outcome data (attrition bias)                  | Low risk                 | Number of patients at baseline and at the end of the follow-up are the same.                                                           |
| Selective reporting (reporting bias)                      | Low risk                 | Both significant and non-significant data have been reported. Adverse events were adequately reported.                                 |
| Other bias                                                | Low risk                 | The study appears to be free of other sources of bias.                                                                                 |

| <b>Doménech et al. 2018</b>                               | <b>Authors judgement</b> | <b>Support for judgement</b>                                                                                                  |
|-----------------------------------------------------------|--------------------------|-------------------------------------------------------------------------------------------------------------------------------|
| Random sequence generation (selection bias)               | Low risk                 | Quote: "...randomization codes were centrally generated using a computer procedure..."<br><br>Blocked randomization was used. |
| Allocation concealment (selection bias)                   | Low risk                 | Quote: "...randomization codes were centrally generated using a computer procedure..."                                        |
| Blinding of participants and personnel (performance bias) | High risk.               | Open-label.                                                                                                                   |
| Blinding of outcome assessment (detection bias)           | High risk                | Quote: "...the endoscopist was not necessarily blinded..."                                                                    |
| Incomplete outcome data (attrition bias)                  | Low risk                 | Intention-to-treat method was used. 123/125 patients completed the study.                                                     |
| Selective reporting (reporting bias)                      | Low risk                 | Both significant and non-significant results have been reported. Adequate                                                     |

|            |          |                                                        |
|------------|----------|--------------------------------------------------------|
|            |          | description of adverse events.                         |
| Other bias | Low risk | The study appears to be free of other sources of bias. |

| <b>Eberhardson et al. 2017</b>                            | Authors judgement | Support for judgement                                                                                                                                                                                                                                                                                                 |
|-----------------------------------------------------------|-------------------|-----------------------------------------------------------------------------------------------------------------------------------------------------------------------------------------------------------------------------------------------------------------------------------------------------------------------|
| Random sequence generation (selection bias)               | Unclear risk      | Blocked randomization (3:2), but method is fully specified.                                                                                                                                                                                                                                                           |
| Allocation concealment (selection bias)                   | Unclear risk      | Not described in the manuscript.                                                                                                                                                                                                                                                                                      |
| Blinding of participants and personnel (performance bias) | Unclear risk      | Double-blind, but insufficient data to permit judgement (form of placebo treatment was not described).                                                                                                                                                                                                                |
| Blinding of outcome assessment (detection bias)           | Low risk          | Quote: "The FACS analysis was blinded to the clinical participants and the FACS analyst was also blinded before unblinding day 12."                                                                                                                                                                                   |
| Incomplete outcome data (attrition bias)                  | Low risk          | 1/9 patient from the placebo group was excluded from the study just after the randomization because of SADE (failure to return blood from the column). 2/14 (14%) were excluded from active study group because of adverse event and worsening of the disease, but analysis was conducted on full analyses set basis. |
| Selective reporting (reporting bias)                      | Unclear risk      | Report of adverse events seems to be inadequate.                                                                                                                                                                                                                                                                      |
| Other bias                                                | Low risk          | The study appears to be free of other sources of bias.                                                                                                                                                                                                                                                                |

| <b>Hanai et al. 2004</b>                                  | Authors judgement | Support for judgement                                                                                |
|-----------------------------------------------------------|-------------------|------------------------------------------------------------------------------------------------------|
| Random sequence generation (selection bias)               | Unclear risk      | Randomized study, but method was not specified in the manuscript.                                    |
| Allocation concealment (selection bias)                   | Unclear risk      | Not described in the manuscript.                                                                     |
| Blinding of participants and personnel (performance bias) | High risk         | Not described in the manuscript, but other similar article from the authors was stated as unblinded. |
| Blinding of outcome assessment (detection bias)           | Low risk          | Quote: "Each patient was assessed blindly..."                                                        |

|                                          |          |                                                                              |
|------------------------------------------|----------|------------------------------------------------------------------------------|
| Incomplete outcome data (attrition bias) | Low risk | Number of patients at baseline and at the end of the follow-up are the same. |
| Selective reporting (reporting bias)     | Low risk | Both significant and non-significant results have been reported.             |
| Other bias                               | Low risk | The study appears to be free of other sources of bias.                       |

| <b>Hanai et al. 2008</b>                                  | Authors judgement | Support for judgement                                                       |
|-----------------------------------------------------------|-------------------|-----------------------------------------------------------------------------|
| Random sequence generation (selection bias)               | Unclear risk      | Randomized study, but method is not described in the manuscript.            |
| Allocation concealment (selection bias)                   | Unclear risk      | Not described in the manuscript.                                            |
| Blinding of participants and personnel (performance bias) | High risk         | Stated as unblinded.                                                        |
| Blinding of outcome assessment (detection bias)           | Low risk          | Quote: "Each patient was assessed blindly..."                               |
| Incomplete outcome data (attrition bias)                  | Low risk          | Number of patients at baseline and at the end of the follow-up are the same |
| Selective reporting (reporting bias)                      | Low risk          | Both significant and non-significant results have been reported             |
| Other bias                                                | Low risk          | The study appears to be free of other sources of bias.                      |

| <b>Nakamura et al. 2004</b>                               | Authors judgement | Support for judgement                                                                                                                  |
|-----------------------------------------------------------|-------------------|----------------------------------------------------------------------------------------------------------------------------------------|
| Random sequence generation (selection bias)               | Unclear risk      | Randomized, but the method was not specified in the manuscript                                                                         |
| Allocation concealment (selection bias)                   | Unclear risk      | Not described in the manuscript.                                                                                                       |
| Blinding of participants and personnel (performance bias) | High risk         | Not described in the manuscript, but probably not done, because the trial compared an interventional procedure to drug treatment only. |
| Blinding of outcome assessment (detection bias)           | Unclear risk      | No information                                                                                                                         |
| Incomplete outcome data (attrition bias)                  | Low risk          | 60/66 completed the study; 1 took non-permitted drugs, 1 relapsed just after the randomization, further 4 withdrew the consent.        |

|                                      |          |                                                                 |
|--------------------------------------|----------|-----------------------------------------------------------------|
| Selective reporting (reporting bias) | Low risk | Both significant and non-significant results have been reported |
| Other bias                           | Low risk | The study appears to be free of other sources of bias.          |

| <b>Sands et al. 2008 A study</b>                          | <b>Authors judgement</b> | <b>Support for judgement</b>                                                                                                                                                                       |
|-----------------------------------------------------------|--------------------------|----------------------------------------------------------------------------------------------------------------------------------------------------------------------------------------------------|
| Random sequence generation (selection bias)               | Low risk                 | Quote: "...using sealed envelopes with sequential numbers issued in blocks of 3..." and                                                                                                            |
| Allocation concealment (selection bias)                   | Low risk                 | Quote: "...using sealed envelopes with sequential numbers issued in blocks of 3..." and                                                                                                            |
| Blinding of participants and personnel (performance bias) | Low risk                 | Quote: "a polyvinylchloride bypass tube was inserted between the Adacolumn and the Adacircuit to permit bypass of the column among patients undergoing sham procedures."                           |
| Blinding of outcome assessment (detection bias)           | Low risk                 | The gastroenterology team was blinded to the treatment assignment.                                                                                                                                 |
| Incomplete outcome data (attrition bias)                  | Low risk                 | Intention-to-treat analysis; however, 66% of patients completed the study (6 patients left the study because of disease flare; 5 from apheresis group, 1 from sham group).                         |
| Selective reporting (reporting bias)                      | Low risk                 | Both significant and non-significant results have been reported                                                                                                                                    |
| Other bias                                                | High risk                | Quote: "Subjects who withdrew before the week 12 visit were treated as treatment failure for primary end point (clinical remission)."<br>Comment: these imputation of ITT analysis may cause bias. |

| <b>Sands et al. 2008 B study</b>            | <b>Authors judgement</b> | <b>Support for judgement</b>                                                 |
|---------------------------------------------|--------------------------|------------------------------------------------------------------------------|
| Random sequence generation (selection bias) | Low risk                 | Quote: "Randomization was performed according to a computer-generated scheme |



|                                                           |           |                                                                                                                                                                                                    |
|-----------------------------------------------------------|-----------|----------------------------------------------------------------------------------------------------------------------------------------------------------------------------------------------------|
|                                                           |           | that used an integrated voice response system."                                                                                                                                                    |
| Allocation concealment (selection bias)                   | Low risk  | Quote: "Randomization was performed according to a computer-generated scheme that used an integrated voice response system."                                                                       |
| Blinding of participants and personnel (performance bias) | Low risk  | Quote: "a polyvinylchloride bypass tube was inserted between the Adacolumn and the Adacircuit to permit bypass of the column among patients undergoing sham procedures."                           |
| Blinding of outcome assessment (detection bias)           | Low risk  | The gastroenterology team was blinded to the treatment assignment.                                                                                                                                 |
| Incomplete outcome data (attrition bias)                  | Low risk  | Intention-to-treat analysis; however, 66% of patients completed the study (6 patients left the study because of disease flare; 5 from apheresis group, 1 from sham group).                         |
| Selective reporting (reporting bias)                      | Low risk  | Both significant and non-significant results have been reported                                                                                                                                    |
| Other bias                                                | High risk | Quote: "Subjects who withdrew before the week 12 visit were treated as treatment failure for primary end point (clinical remission)."<br>Comment: these imputation of ITT analysis may cause bias. |

| <b>Sawada et al. 2005</b>                                 | <b>Authors judgement</b> | <b>Support for judgement</b>                                                                                                                                                          |
|-----------------------------------------------------------|--------------------------|---------------------------------------------------------------------------------------------------------------------------------------------------------------------------------------|
| Random sequence generation (selection bias)               | Unclear risk             | minimization by an independent controller.                                                                                                                                            |
| Allocation concealment (selection bias)                   | Unclear risk             | Quote: "The assignment of the enrolled patients to the active group or the sham group was performed by a controller who was independent of the other staff, patients, and relatives." |
| Blinding of participants and personnel (performance bias) | Low risk                 | Quote: "Both columns were covered with an opaque material so that they could                                                                                                          |

|                                                 |          |                                                                                                                                                       |
|-------------------------------------------------|----------|-------------------------------------------------------------------------------------------------------------------------------------------------------|
|                                                 |          | not be distinguished by the patients."                                                                                                                |
| Blinding of outcome assessment (detection bias) | Low risk | Quote: "To ensure proper blinding within the clinical evaluation, the medical staffs of each institution were separated into two independent groups." |
| Incomplete outcome data (attrition bias)        | Low risk | All of the enrolled eligible patients were evaluated.                                                                                                 |
| Selective reporting (reporting bias)            | Low risk | All outcomes of interest were reported.                                                                                                               |
| Other bias                                      | Low risk | The study appears to be free of other sources of bias. Comment: these imputation of ITT analysis may cause bias.                                      |

| <b>Emmrich et al. 2006</b>                                | <b>Authors judgement</b> | <b>Support for judgement</b>                                                                                                           |
|-----------------------------------------------------------|--------------------------|----------------------------------------------------------------------------------------------------------------------------------------|
| Random sequence generation (selection bias)               | Unclear risk             | Randomized, but method is not specified in the manuscript.                                                                             |
| Allocation concealment (selection bias)                   | Unclear risk             | Not described in the manuscript.                                                                                                       |
| Blinding of participants and personnel (performance bias) | High risk                | Not described in the manuscript, but probably not done, because the trial compared an interventional procedure to drug treatment only. |
| Blinding of outcome assessment (detection bias)           | Unclear risk             | Not described in the manuscript.                                                                                                       |
| Incomplete outcome data (attrition bias)                  | Low risk                 | Only 1/9 patient from active group discontinued the study.                                                                             |
| Selective reporting (reporting bias)                      | Unclear risk             | Report of adverse events seems to be inadequate.                                                                                       |
| Other bias                                                | Low risk                 | The study appears to be free of other sources of bias.                                                                                 |

| <b>Fukunaga et al. 2012</b>                               | <b>Authors judgement</b> | <b>Support for judgement</b>                                                                |
|-----------------------------------------------------------|--------------------------|---------------------------------------------------------------------------------------------|
| Random sequence generation (selection bias)               | Low risk                 | Blocked randomization according to a computer-generated scheme.                             |
| Allocation concealment (selection bias)                   | Low risk                 | Patients were randomized in a 1:1:1 ratio by a statistician at an independent organization. |
| Blinding of participants and personnel (performance bias) | Low risk                 | Quote: "Both patients and the physician were blinded by a curtain."                         |

|                                                 |              |                                                                                                                                                                                                                                        |
|-------------------------------------------------|--------------|----------------------------------------------------------------------------------------------------------------------------------------------------------------------------------------------------------------------------------------|
| Blinding of outcome assessment (detection bias) | Unclear risk | Not described in the manuscript.                                                                                                                                                                                                       |
| Incomplete outcome data (attrition bias)        | Low risk     | 21/22 completed the study.                                                                                                                                                                                                             |
| Selective reporting (reporting bias)            | Low risk     | Both significant and non-significant results have been reported.                                                                                                                                                                       |
| Other bias                                      | Unclear risk | Concomitant therapeutic regimen was not described clearly, and the authors stated: "a significant fraction of patients in each arm were on concomitant PSL or AZA and this enabled us to assess the contribution of these medications" |

| <b>Maiden et al. 2008</b>                                 | <b>Authors judgement</b> | <b>Support for judgement</b>                                                                              |
|-----------------------------------------------------------|--------------------------|-----------------------------------------------------------------------------------------------------------|
| Random sequence generation (selection bias)               | Low risk                 | Quote: "Randomization was conducted using a linear random number generator of 0 to 1."                    |
| Allocation concealment (selection bias)                   | Unclear risk             | Not described in the manuscript.                                                                          |
| Blinding of participants and personnel (performance bias) | High risk                | Open label                                                                                                |
| Blinding of outcome assessment (detection bias)           | High risk                | Open label                                                                                                |
| Incomplete outcome data (attrition bias)                  | Low risk                 | Number of patients at baseline and at the end of the follow-up are the same.                              |
| Selective reporting (reporting bias)                      | Unclear risk             | Report of adverse events seems to be inadequate. Number of events in the control group was not described. |
| Other bias                                                | Low risk                 | The study appears to be free of other sources of bias.                                                    |

## Supplementary Figure 3

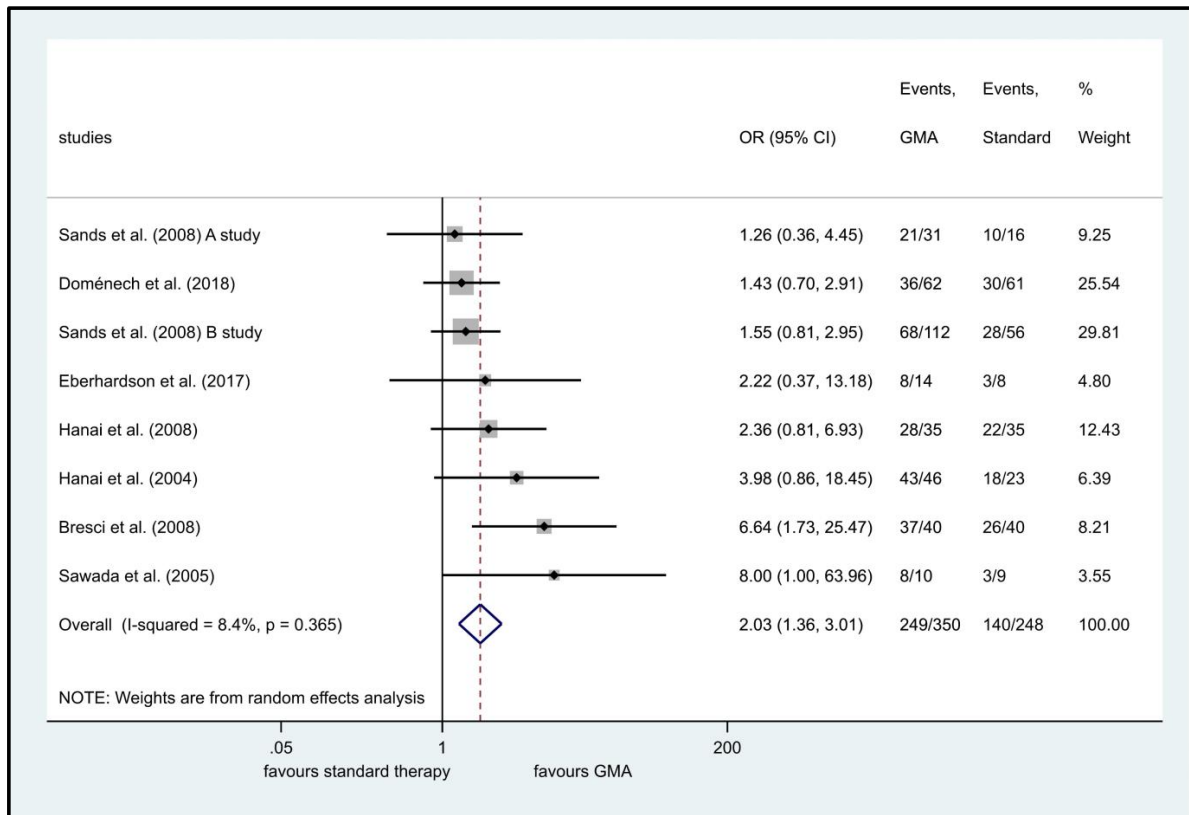

## Supplementary Figure 4

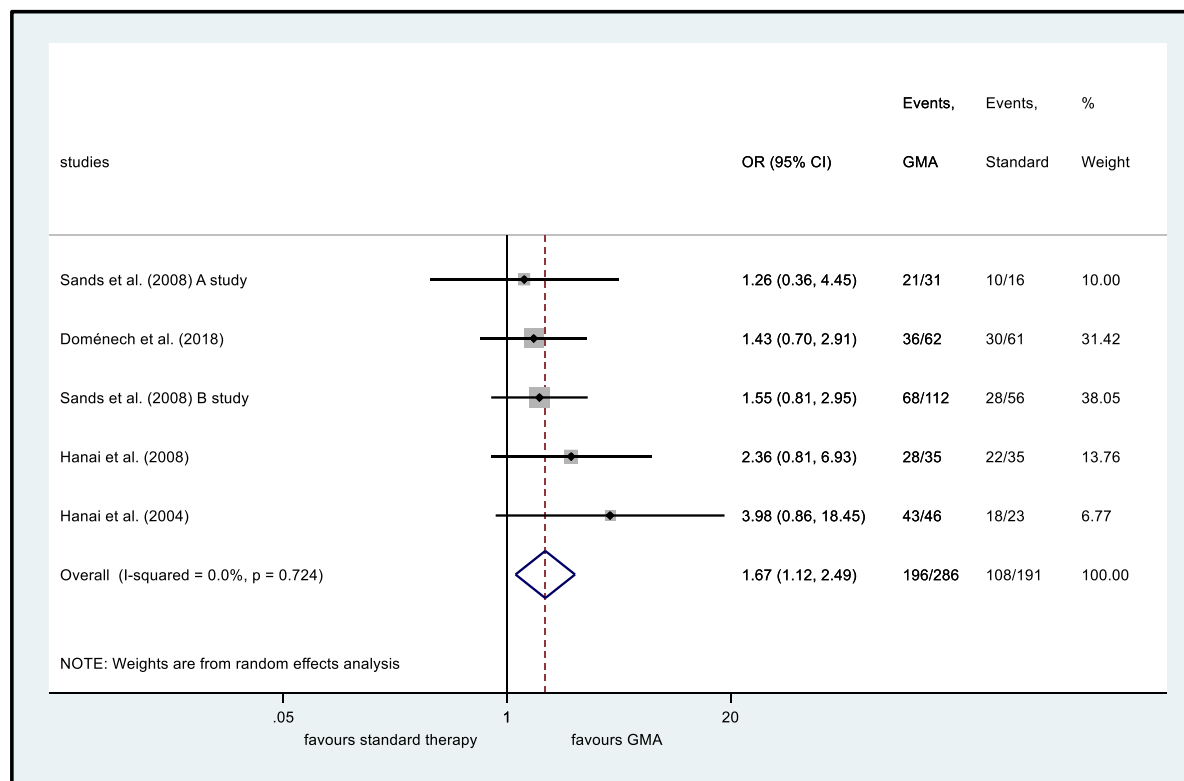

# Supplementary Figure 5

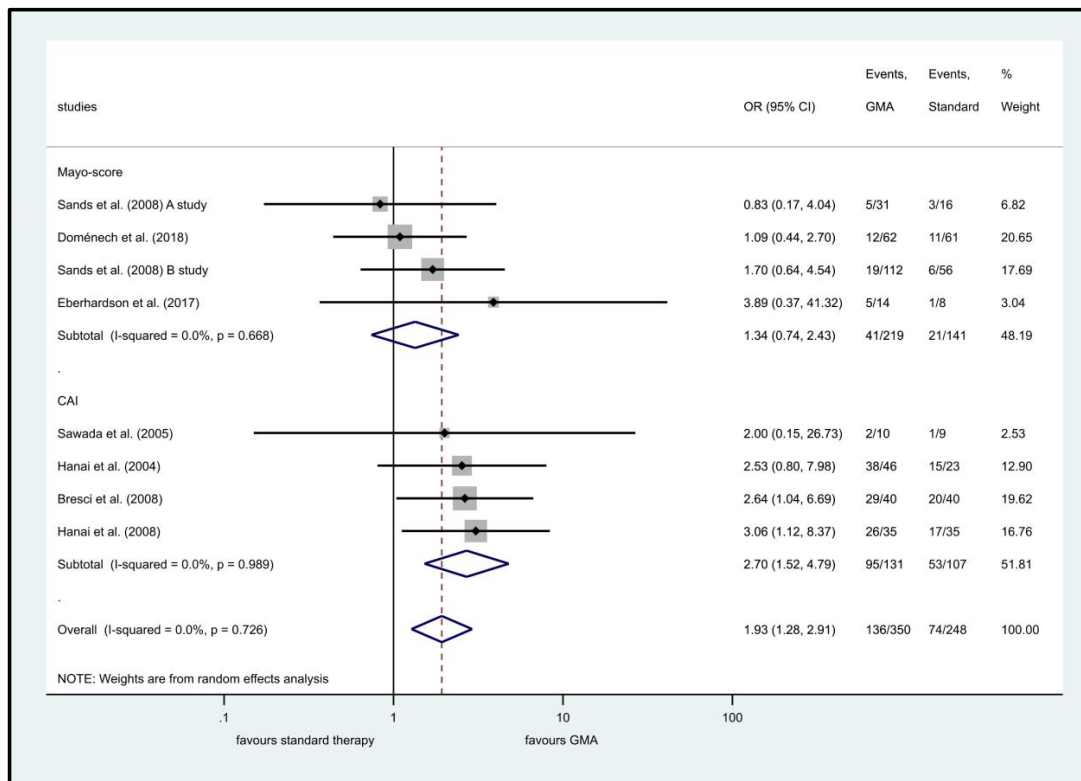

## Supplementary Figure 6

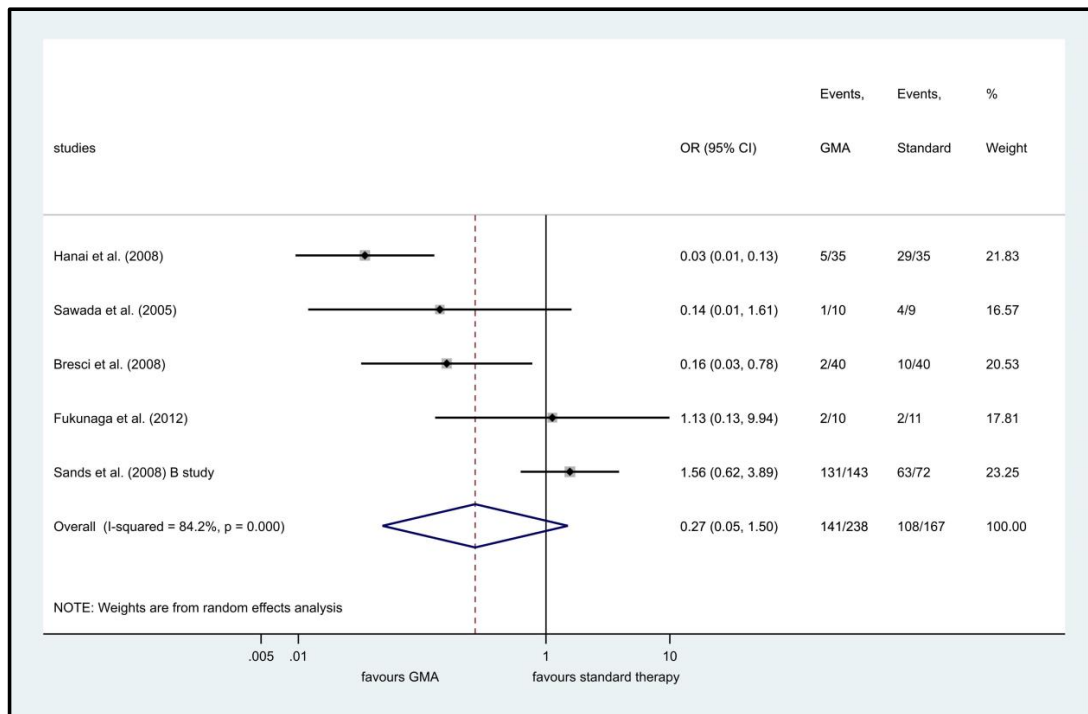

# Supplementary Figure 7

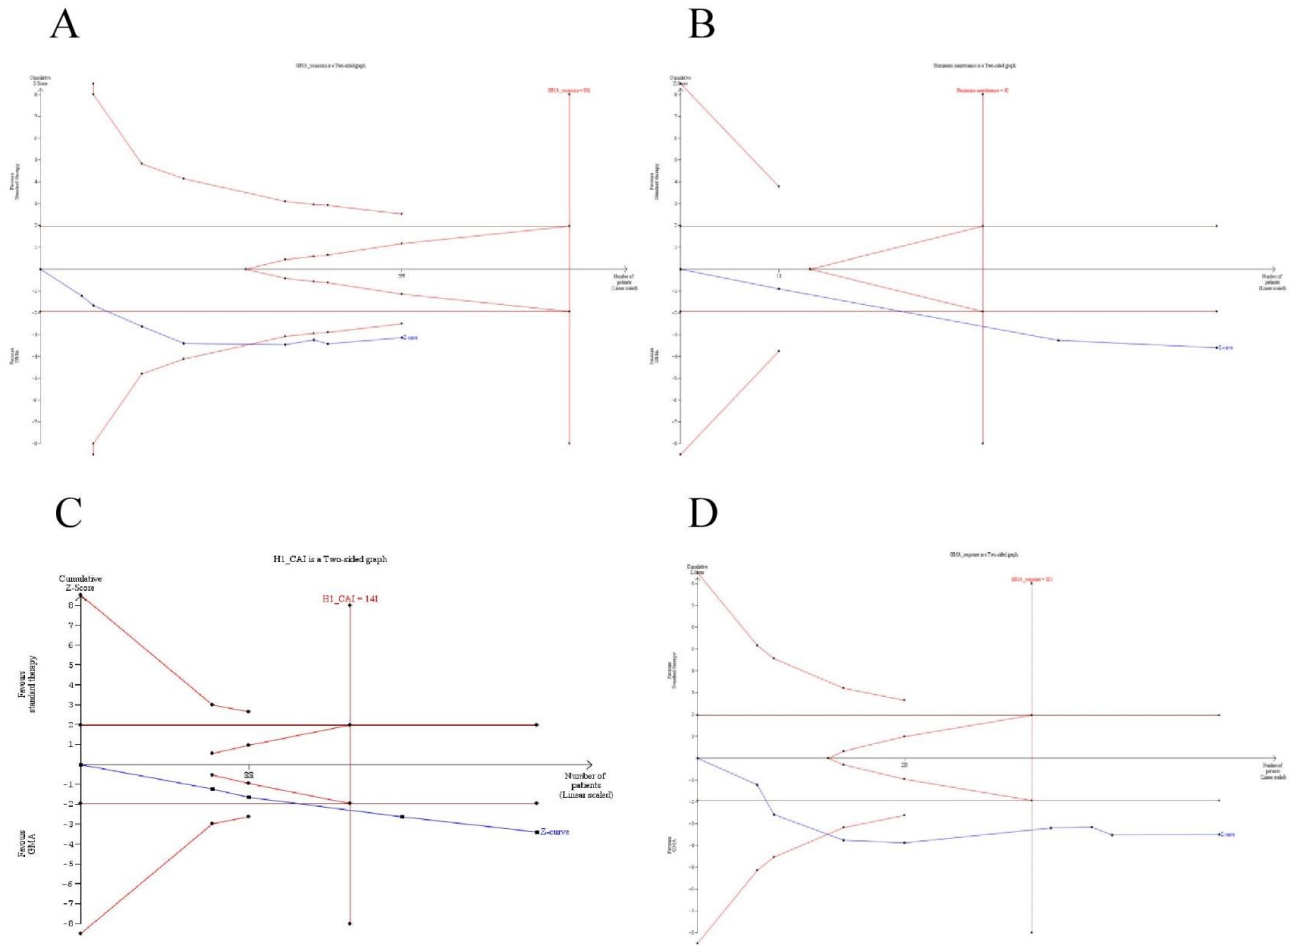



## Supplementary Table 1

| Study                | Reported adverse events                                                                                                                                                                                                                                           |
|----------------------|-------------------------------------------------------------------------------------------------------------------------------------------------------------------------------------------------------------------------------------------------------------------|
| Hanai et al. 2004    | flushing, nausea, mild fever                                                                                                                                                                                                                                      |
| Sawada et al. 2005   | fever, skin rash, back pain                                                                                                                                                                                                                                       |
| Bresci et al. 2008   | headache, gastrointestinal intolerance, facies lunaris, vascular hypertension, glucose intolerance                                                                                                                                                                |
| Fukunaga et al. 2012 | nausea, skin itchiness                                                                                                                                                                                                                                            |
| Sands et al. 2008    | headache, disease flare-up, decreased diastolic blood pressure, nasopharyngitis, hypotension, nausea, fatigue, post procedure hematoma, abdominal pain, dizziness, vomiting, vessel puncture site bruise, diarrhea, upper respiratory tract infection, flatulence |

## Supplementary Table 2

| Certainty assessment                                                  |                   |              |               |                           |                             |                                     | № of patients                                                                      |                                                   | Effect                            |                                                              | Certainty        | Importance |
|-----------------------------------------------------------------------|-------------------|--------------|---------------|---------------------------|-----------------------------|-------------------------------------|------------------------------------------------------------------------------------|---------------------------------------------------|-----------------------------------|--------------------------------------------------------------|------------------|------------|
| № of studies                                                          | Study design      | Risk of bias | Inconsistency | Indirectness              | Imprecision                 | Other considerations                | standard therapy for clinical remission induction and GMA as an adjunctive therapy | standard therapy for clinical remission induction | Relative (95% CI)                 | Absolute (95% CI)                                            |                  |            |
| <b>Clinical remission rate (assessed with: CAI or Mayo-score)</b>     |                   |              |               |                           |                             |                                     |                                                                                    |                                                   |                                   |                                                              |                  |            |
| 8                                                                     | randomized trials | very serious | not serious   | not serious               | serious                     | none                                | 136/350 (38.9%)                                                                    | 74/249 (29.7%)                                    | <b>OR 1.94</b><br>(1.28 to 2.92)  | <b>153 more per 1 000</b><br>(from 54 more to 255 more)      | ⊕○○○<br>VERY LOW | CRITICAL   |
| <b>Clinical response and clinical improvement (CAI or Mayo-score)</b> |                   |              |               |                           |                             |                                     |                                                                                    |                                                   |                                   |                                                              |                  |            |
| 8                                                                     | randomized trials | very serious | not serious   | not serious               | not serious                 | none                                | 249/350 (71.1%)                                                                    | 140/249 (56.2%)                                   | <b>OR 2.05</b><br>(1.37 to 3.06)  | <b>162 more per 1 000</b><br>(from 75 more to 235 more)      | ⊕⊕○○<br>LOW      | CRITICAL   |
| <b>Clinical remission maintenance rate (assessed with: CAI)</b>       |                   |              |               |                           |                             |                                     |                                                                                    |                                                   |                                   |                                                              |                  |            |
| 3                                                                     | randomized trials | serious      | not serious   | serious <sup>a</sup>      | not serious                 | none                                | 39/36 (108.3%)                                                                     | 17/35 (48.6%)                                     | <b>OR 8.34</b><br>(2.64 to 26.32) | <b>402 more per 1 000</b><br>(from 228 more to 476 more)     | ⊕⊕○○<br>LOW      | CRITICAL   |
| <b>Adverse events</b>                                                 |                   |              |               |                           |                             |                                     |                                                                                    |                                                   |                                   |                                                              |                  |            |
| 5                                                                     | randomized trials | very serious | not serious   | very serious <sup>b</sup> | very serious <sup>c,d</sup> | publication bias strongly suspected | 141/238 (59.2%)                                                                    | 108/167 (64.7%)                                   | <b>OR 0.27</b><br>(0.05 to 1.50)  | <b>316 fewer per 1 000</b><br>(from 563 fewer to 86 more)    | ⊕○○○<br>VERY LOW | IMPORTANT  |
| <b>Steroid-sparing effect</b>                                         |                   |              |               |                           |                             |                                     |                                                                                    |                                                   |                                   |                                                              |                  |            |
| 3                                                                     | randomized trials | serious      | not serious   | not serious               | very serious <sup>d</sup>   | none                                | 66                                                                                 | 43                                                | -                                 | <b>WMD 6.83 mg/day lower</b><br>(14.47 lower to 0.81 higher) | ⊕○○○<br>VERY LOW | IMPORTANT  |

CI: Confidence interval; OR: Odds ratio

## Explanations

a. Duration of follow-up differs among studies (6 months or 12 months). b. Pool of adverse events differs among studies. c. The optimal information size criterion is not met. d. TSA could not be carried out.
